1 **Solid-state esophageal pressure sensor for the estimation of pleural**  
2 **pressure: a bench and first-in-human validation study**

3

4 Julien P. van Oosten<sup>1</sup>, Nico Goedendorp<sup>1</sup>, Amne Mousa<sup>2,3</sup>, Rutger Flink<sup>4</sup>, Rik Schaart<sup>4</sup>,  
5 Merel Flinsenbergh<sup>1</sup>, Peter Somhorst<sup>1</sup>, Diederik A.M.P.J. Gommers<sup>1</sup>, Leo Heunks<sup>5</sup>,  
6 Annemijn H. Jonkman<sup>1</sup>

7

8 **Author affiliations:**

9

1) Intensive Care, Erasmus Medical Center, Rotterdam, The Netherlands

10

2) Intensive Care, Amsterdam UMC location Vrije Universiteit Amsterdam, The  
11 Netherlands

12

3) Amsterdam Cardiovascular Sciences, Amsterdam, the Netherlands

13

4) Pulmotech B.V., Leek, The Netherlands

14

5) Intensive Care, Radboud University Medical Center, Nijmegen, The Netherlands

15

16 **Correspondence to:** Dr. Julien van Oosten, e-mail address: [j.vanoosten@erasmusmc.nl](mailto:j.vanoosten@erasmusmc.nl);  
17 work address: Dr. Molewaterplein 40, 3015 GD Rotterdam, Intensive Care Volwassenen

18

19 **Running title:** Solid state esophageal catheter validation

20

21 **Word count:** 3564

22

23 **Keywords:** Solid-state sensor, esophageal catheter, respiratory monitoring, pleural  
24 pressure, mechanical ventilation

25 ABSTRACT

26 **Word count:** 294

27 **Background:** Advanced respiratory monitoring through the measurement of esophageal  
28 pressure (Pes) as a surrogate of pleural pressure helps guiding mechanical ventilation in ICU  
29 patients. Pes measurement with an esophageal balloon catheter, the current clinical  
30 reference standard, needs complex calibrations and a multitude of factors influence its  
31 reliability. Solid-state pressure sensors might be able to overcome these limitations.

32

33 **Objectives:** To evaluate the accuracy of a new solid-state Pes transducer (Pes<sub>solid</sub>). We  
34 hypothesized that measurements are non-inferior to those obtained with a properly  
35 calibrated balloon catheter (Pes<sub>bal</sub>).

36

37 **Methods:** Absolute and relative solid-state sensor Pes measurements were compared to a  
38 reference pressure in a 5-day bench setup, and to simultaneously placed balloon catheters  
39 in 15 spontaneously breathing healthy volunteers and in 16 mechanically ventilated ICU  
40 patients. Bland-Altman analysis was performed with nonparametric bootstrapping to  
41 estimate bias and upper and lower limits of agreement (LoA).

42

43 **Results:** *Bench study:* Solid-state pressure transducers had a positive bias ( $P_{\text{solid}} - P_{\text{ref}}$ ) of  
44 around 1 cmH<sub>2</sub>O for the absolute minimal and maximum pressures, and no bias for pressure  
45 swings. *Healthy volunteers:* the solid-state transducer revealed a bias (Pes<sub>solid</sub>-Pes<sub>bal</sub>) [upper  
46 LoA; lower LoA] of 1.58 [8.19; -5.03], -2.37 [3.96; -8.69] and 3.94 [11.09; -3.20] cmH<sub>2</sub>O for  
47 end-expiratory, end-inspiratory and  $\Delta$ Pes values, respectively. *ICU patients:* the solid-state  
48 transducer showed a bias (Pes<sub>solid</sub>-Pes<sub>bal</sub>) [upper LoA; lower LoA] during controlled / assisted

49 ventilation of: -0.15 [1.39; -1.70] / -0.20 [5.02; -5.41], 0.32 [3.35; -2.72] / -0.54 [4.60; -5.68]  
50 and 0.47 [3.79; -2.85] / 0.35 [3.88; -3.18] cmH<sub>2</sub>O for end-expiratory, end-inspiratory and  
51  $\Delta$ Pes values, respectively. LoA were <2cmH<sub>2</sub>O for static measurements on controlled  
52 ventilation.

53

54 **Conclusions:** the novel solid-state pressure transducer showed good accuracy on the bench,  
55 in healthy volunteers and in ventilated ICU-patients. This could contribute to the  
56 implementation of Pes as advanced respiratory monitoring technique.

57

58 **Trial registration:** Clinicaltrials.gov identifier: NCT05817968 (patient study). Registered on  
59 18 April 2023.

60 INTRODUCTION

61           Advanced respiratory monitoring through the measurement of esophageal pressure  
62 (Pes) as a surrogate for pleural pressure helps understanding partitioned respiratory  
63 mechanics and breathing effort in mechanically ventilated patients, and could guide the  
64 individualization of ventilator settings.[1] Despite the recognized benefits, widespread  
65 implementation of esophageal manometry is still in its infancy.[1–4] It requires (technical)  
66 expertise and the validation and calibration of balloon catheters is often challenging. For  
67 instance, optimal filling volumes vary according to the balloon type, patient factors and  
68 ventilator settings, and both excessive and insufficient balloon filling volumes dampen Pes  
69 amplitudes.[1,5] In addition, the balloon may empty over time, resulting in an  
70 underestimation of pressures. Signal dampening could also occur if compliant tubing is used  
71 to connect the catheter to the extracorporeal pressure sensor. Therefore, for correct  
72 interpretation of respiratory physiology and optimal patient/ventilator management,  
73 adequate balloon position and filling volume should be regularly confirmed with an  
74 occlusion test and adjusted accordingly.[1]

75           Pes catheters using a solid-state pressure transducer might be able to overcome  
76 some of the above limitations. These sensors measure Pes directly inside the esophagus,  
77 allowing a faster frequency response while not being subjected to signal dampening.  
78 Previous older studies have used such transducers, but showed unacceptable signal  
79 drifting.[6,7] These studies, however, used pressure transducers that were not correctly  
80 (temperature) calibrated. Here, we evaluate the accuracy of a new solid-state Pes catheter  
81 with a transducer that allows for both temperature and ambient pressure calibration. We  
82 hypothesized that measurements are non-inferior as compared to a correctly calibrated

83 balloon catheter. We tested this hypothesis in a bench setup, in healthy volunteers, and in  
84 mechanically ventilated patients during controlled and assisted ventilation.

85

## 86 METHODS

87 For additional details, see Additional file 1.

88

### 89 **Study design and subjects**

90 This study consisted of: 1) a bench study (September 2023) at the manufacturer  
91 location (Pulmotech B.V., Leek, the Netherlands), 2) a prospective study in spontaneously  
92 breathing healthy volunteers (August–October 2021) at the intensive care unit (ICU) of the  
93 Amsterdam University Medical Center, Amsterdam, the Netherlands (ethics approval  
94 number METC 2020.470), and 3) a prospective study in mechanically ventilated ICU patients  
95 (October 2023 to March 2024) at the ICU of the Erasmus Medical Center, Rotterdam, The  
96 Netherlands (ethics approval number MEC-2023-0119; ClinicalTrials.gov: NCT05817968).  
97 Extensive technical development tests were performed prior to the healthy volunteer study;  
98 these data are not part of this manuscript. Written informed consent was obtained from  
99 healthy subjects and patients according to local regulations.

100

#### 101 *Healthy volunteers*

102 We recruited healthy, non-obese adults without history of cardiac and/or pulmonary  
103 disease and contraindications for nasogastric catheter placement (e.g., esophageal varices,  
104 recent (<2 weeks) nasal bleeding, use of anticoagulants).

105

#### 106 *Patients*

107 Elective adult cardiothoracic surgery patients requiring postoperative invasive  
108 controlled mechanical ventilation in the ICU were enrolled pre-surgery. Eligibility was  
109 reassessed at ICU arrival. Exclusion criteria were: (1) upper airway/esophageal/mouth or  
110 face pathology (i.e. recent surgery, esophageal varices, diaphragmatic hernia), (2) nasal  
111 bleeding within the last 2 weeks, (3) presence of pneumothorax, (4) inadequate coagulation,  
112 (5) pregnancy.

113

#### 114 **Data collection**

115 We collected sex, age, height, body mass index (BMI), and for the ICU population  
116 also the relevant medical history (cardiac and pulmonary diseases), type of surgery  
117 performed, vital signs and ventilator settings throughout study procedures. Device-related  
118 adverse events were noted.

119

#### 120 **Esophageal manometry**

121 We tested the intelligent Esophageal Pressure Catheter (iEPC) (PulmoTech B.V.), a  
122 CE-marked 12 French catheter with a length of 125cm that combines nasogastric feeding  
123 with Pes measurements via a solid-state pressure sensor (Additional file 2). The catheter  
124 was connected to an acquisition system (iEPMS, PulmoTech B.V. connected to Polybench,  
125 Applied Biosignals GmbH, Germany) for data sampling at 200Hz.

126 Measurements were compared with a standard balloon catheter, either the Cooper  
127 catheter (Cooper Surgical, USA: 5 French, length 85cm, balloon length 9.5cm – used in  
128 healthy volunteers and patients) or the NutriVent™ catheter (Sidam, Italy: 14 French  
129 catheter, length 108cm, balloon length 10cm – used in patients). The balloon catheter, an  
130 airway pressure (Paw, healthy subjects + patients) and flow sensor (healthy subjects) were

131 connected to an acquisition system (MP160, BIOPAC Systems Inc., USA) for simultaneous  
132 recording of waveforms sampled at 200Hz. Waveforms were synchronized with the solid-  
133 state sensor tracings offline.

134

## 135 **Procedures**

### 136 *Bench*

137 Catheters were exposed to physiological conditions (100% relative humidity and  
138 37°C) for 5 days (Additional file 3). Pressure swings of 12 cmH<sub>2</sub>O above 10 cmH<sub>2</sub>O baseline  
139 at a rate of 12/minute were applied using the AVEA (Viasys Healthcare, USA) in conjunction  
140 with a humidifier (F&P MR850, New Zealand). Temperature and relative humidity were  
141 controlled to maintain 37±2°C and >90%, respectively. Reference pressure ( $P_{ref}$ ) was  
142 measured through a non-compliant tube connected to the setup. Data was recorded at  
143 30Hz for the solid-state pressures ( $P_{solid}$ ), and at 200Hz for  $P_{ref}$  (iEPMS, PulmoTech B.V.).

144

### 145 *Healthy volunteers*

#### 146 Catheter placement/calibration

147 Prior to insertion, the solid-state sensor was calibrated according to the  
148 manufacturer's instructions (see Additional file 1). Both catheters were inserted aimed at  
149 measuring  $P_{es}$  in the mid-esophageal range; location of the sensor corresponded to  
150 approximately halfway the balloon. Esophageal placement was confirmed by cardiac  
151 artifacts/esophageal spasms on the pressure waveforms. Balloon filling volume was checked  
152 with the Baydur maneuver (end-expiratory occlusion test) and adjusted when needed (see  
153 Additional file 1). The  $\Delta P_{es_{bal}}/\Delta P_{aw}$  ratio was targeted at 0.9-1.1 for higher accuracy. If this  
154 range was not reached after five maneuvers, a range of 0.8-1.2 was accepted.

155 Measurements

156 Recordings were obtained with subjects in sitting, semi-recumbent, supine and  
157 prone position. Balloon catheter accuracy was verified in between position changes. In each  
158 body position, 2 minutes of Pes during unloaded tidal breathing was acquired. During sitting  
159 and semi-recumbent position, subjects were additionally shortly exposed to three levels of  
160 inspiratory effort to obtain a variable within-subject range of effort (thus Pes values), using  
161 a threshold loading device (Power Breathe, POWERbreathe Ltd, UK), see Additional file 1.

162

163 *Patients*

164 The study protocol was initiated directly after surgery upon arrival on the ICU.  
165 Ventilator settings were according to clinical protocols.

166

167 Catheter placement/calibration

168 Catheter positioning and calibration were similar as to healthy volunteers, while  
169 patients were still deeply sedated. Position was verified with thoracic X-ray when made  
170 within standard of care and/or using video laryngoscopy. The NutriVent catheter was  
171 initially used as comparator; however, in the first four patients, interference between both  
172 catheters was observed (see Results). From the 5<sup>th</sup> patient, the Cooper catheter was used  
173 instead.

174

175 Measurements

176 During controlled ventilation, 10 minutes of tidal breathing were recorded, and three  
177 end-inspiratory and end-expiratory holds were performed (at 0, 5 and 10 minutes) for static  
178 measurements. Another 10-minute recording was performed during partially assisted



179 ventilation when spontaneous breathing resumed as per clinical care. Correct balloon filling  
180 volume was verified at the start of each recording. Catheters were removed upon study  
181 completion.

182

### 183 **Offline analysis**

184 For the bench study, the minimum, maximum and delta pressures were calculated  
185 using custom software (Polybench, Applied BioSignals, Germany). At each measurement  
186 time point, a median for each parameter was calculated over 60 preceding artificial breaths  
187 for further analyses.

188 For the healthy volunteers and patient studies, signal processing and analyses were  
189 performed in MATLAB (Mathworks, USA). Periods or individual breaths with substantial  
190 artifacts (e.g., esophageal spasms, coughing) were removed. Signals were processed using a  
191 2<sup>nd</sup>-order 5 Hz low-pass Butterworth filter followed by a 0.1 second unweighted moving  
192 average filter. Static measurements for end-expiratory and end-inspiratory holds (in  
193 patients) and the Baydur maneuver ( $\Delta P_{es_{bal}}/\Delta P_{aw}$  and  $\Delta P_{es_{solid}}/\Delta P_{aw}$ ) were manually  
194 selected from the tracings. Whereas the  $\Delta P_{es_{bal}}/\Delta P_{aw}$  was used to verify balloon filling  
195 volume throughout the study, for the solid-state pressure transducer the Baydur test served  
196 as offline measure for sensor stability (as this catheter only requires zeroing before  
197 insertion). A breath detection algorithm was used and absolute values for end-inspiratory  
198  $P_{es}$ , end-expiratory  $P_{es}$  and the resulting inspiratory amplitude ( $\Delta P_{es}$ ) were computed  
199 breath-by-breath for both signals (in cmH<sub>2</sub>O).

200

201 *Endpoints*

202 For the bench study,  $P_{\text{solid}}$  was compared to  $P_{\text{ref}}$ . For healthy subjects and patients,  
203 the primary endpoint was the difference in absolute  $P_{\text{es}}$  values between the solid-state  
204 sensor and balloon catheter ( $P_{\text{es}_{\text{solid}}} - P_{\text{es}_{\text{bal}}}$ ), measured at end-expiration and peak  
205 inspiration, and the difference in relative  $P_{\text{es}}$  values (i.e., inspiratory amplitude) between  
206 both catheters ( $\Delta P_{\text{es}_{\text{solid}}} - \Delta P_{\text{es}_{\text{bal}}}$ ). Endpoints were separated for the different ventilation  
207 modes/populations. Secondary endpoints were the stability of the solid-state catheter as  
208 from repeated Baydur values, and device-related adverse events.

209

### 210 **Sample size**

211 Sixteen catheters were tested on the bench; a convenience sample based on  
212 standard deviations (SD) obtained in the manufacturer's previous technical tests. These  
213 tests were also used to substantiate sample sizes for the in-human studies, resulting in 7  
214 subjects required for Bland-Altman analyses for each study, assuming a type-I error of 0.05  
215 and type-II error of 0.20, and the following variables: expected mean (SD) of difference: 0.79  
216 (0.53)  $\text{cmH}_2\text{O}$ ; maximum allowed difference between methods: 3.5  $\text{cmH}_2\text{O}$ , based on  
217 pressure accuracy tests and sensor drift tests (Pulmotech B.V.). We enrolled a larger sample  
218 (15 healthy subjects, 16 patients) to allow for more variability, to increase user-experience  
219 and to account for potential clinical/technical challenges.

220

### 221 **Statistical analysis**

222 Statistical analyses were performed in R (RStudio, version 2024.02.2, Posit Software,  
223 PBC). For the bench, mean difference (i.e.,  $P_{\text{solid}} - P_{\text{ref}}$ ), and upper and lower limits of  
224 agreement (LoA) were calculated for each measurement time point. For the healthy  
225 volunteer and patient studies, baseline demographics and/or ventilator settings are

226 presented as median (interquartile range, IQR) or numbers (%). Bland-Altman analysis with  
227 bootstrapping to account for variable number of breaths across subjects was performed to  
228 compare Pes values between catheters (see Additional file 1). For the healthy volunteers  
229 where variability in inspiratory effort was introduced with loaded breathing, agreement  
230 between Pes values for the solid-state vs. balloon was also evaluated with simple linear  
231 regression.

232

## 233 RESULTS

### 234 **Bench study**

235 The 16 solid-state sensors demonstrated a small positive bias ( $P_{\text{solid}} - P_{\text{ref}}$ ) that  
236 increased from 0 to approximately 1.5 cmH<sub>2</sub>O during the first 10 hours for the absolute  
237 minimal and maximum pressures, and then remained stable at around 1 cmH<sub>2</sub>O until 120  
238 hours (Figure 1AB). There was a negligible bias for pressure swings (0.13 cmH<sub>2</sub>O) throughout  
239 the full study (Figure 1C).

240

### 241 **Healthy volunteers**

242 Fifteen healthy subjects (male/female 3/12; age 35.5±13.5 years) completed the  
243 study without adverse events. Two subjects were excluded from the full analysis, because of  
244 balloon catheter dislocation early in the study and inability to obtain reliable recordings  
245 after this was noticed (n=1), or balloon Baydur ( $\Delta P_{\text{es}_{\text{bal}}}/\Delta P_{\text{aw}}$ ) exceeding the 0.8-1.2 range  
246 throughout the study (n=1). For other subjects (n=5), short sections with low signal quality  
247 were removed (i.e., many esophageal spasms and/or cardiac artefacts, or  $\Delta P_{\text{es}_{\text{bal}}}/\Delta P_{\text{aw}}$  not  
248 within 0.8-1.2 range for a specific body position).

249

## 250 *Comparisons*

251 Figure 2 shows examples of  $Pes_{bal}$  and  $Pes_{solid}$  tracings. A total of 563 breaths of  
252 thirteen subjects were included in analyses when accepting tracings with  $\Delta Pes_{bal}/\Delta Paw$   
253 within the 0.9-1.1 range. Bland-Altman analyses (Figure 3) revealed a bias (i.e.,  $Pes_{solid} -$   
254  $Pes_{bal}$ ) [upper LoA; lower LoA] of 1.58 [8.19; -5.03], -2.37 [3.96; -8.69] and 3.94 [11.09; -3.20]  
255  $cmH_2O$  for end-expiratory, end-inspiratory and  $\Delta Pes$  values, respectively.  $Pes_{bal}$  and  $Pes_{solid}$   
256 values showed moderate to good correlations (Additional files 4-6), with an average  $R^2$  of  
257 0.70, 0.82 and 0.84 for end-expiratory, end-inspiratory and  $\Delta Pes$  values, respectively.

258 The average  $\Delta Pes_{bal}/\Delta Paw$  was  $0.87 \pm 0.26$  (min-max: 0.39-1.12; n=97 maneuvers),  
259 indicating that the balloon required frequent recalibrations after e.g. body position changes  
260 before adequate comparisons with  $Pes_{solid}$  could be made. For the solid-state catheter,  
261 Baydur maneuvers were analyzed offline to determine sensor stability. Of the 98 maneuvers  
262 analysed,  $\Delta Pes_{solid}/\Delta Paw$  ratio was  $1.01 \pm 0.14$  [min-max: 0.74-1.54]; 10 measurements (of  
263 which 4 from one subject) exceeded the 0.8-1.2 range.

264 We performed two sensitivity analysis: 1) when accepting tracings with  $\Delta Pes_{bal}/\Delta Paw$   
265 within the 0.8-1.2 range, 877 breaths were included, resulting in comparable bias and LoA  
266 (Additional File 7); 2) when selecting only tracings with both  $\Delta Pes_{solid}/\Delta Paw$  and  
267  $\Delta Pes_{bal}/\Delta Paw$  ratios between 0.9-1.1 and excluding one subject where cardiac artifacts  
268 amplitudes exceeded 5  $cmH_2O$  in both signals, 357 breaths from 11 subjects were used,  
269 resulting in a lower bias [upper LoA; lower LoA]: 0.68 [7.80; -6.44], -2.08 [3.21; -7.37] and  
270 2.77 [9.42; -3.89]  $cmH_2O$  for end-expiratory, end-inspiratory and  $\Delta Pes$  values, respectively.

271

## 272 **Patients**

273           27 patients consented prior to their surgery, and 16 patients (see Table 1 for  
274 characteristics) were eventually enrolled upon ICU arrival. Reasons for withdrawal were a  
275 last-minute canceled/rescheduled surgery (n=10) and hemodynamic instability (n=1). One  
276 patient was excluded from the full analysis, as the solid-state sensor demonstrated non-  
277 physiological signals (i.e., Pes swings exceeding Paw) and the Nutrivent catheter was  
278 unreliable due to balloon emptying despite recalibration attempts (Additional file 8). For  
279 controlled ventilation, one additional patient was excluded due to balloon (Cooper) catheter  
280 emptying (but included for assisted ventilation after adequate recalibration). For assisted  
281 ventilation, three additional patients were excluded (but included in controlled ventilation  
282 analysis) due to: technical issues (n=1), very low breathing efforts (n=1), many artifacts  
283 hampering breath detection (n=1). This resulted in a total analysis set of 2200 breaths from  
284 14 patients during controlled ventilation and 889 breaths from 12 patients during assisted  
285 ventilation; all Pes<sub>bal</sub> tracings were adequately calibrated with a Baydur maneuver between  
286 0.9-1.1. No adverse events were reported.

287

### 288 *Signal interference*

289           Signal interference between the solid-state and Nutrivent catheter is explained in  
290 Additional file 9, likely the result of having two rather thick catheters (with large balloon of  
291 Nutrivent catheter) in place and rendering parts of the data unusable for further analysis.  
292 After using the Cooper catheter (from the 5<sup>th</sup> patient), such interference was not observed.

293

### 294 *Comparisons*

295           Figure 4 shows Pes<sub>bal</sub> and Pes<sub>solid</sub> tracings during controlled and assisted ventilation.  
296 During controlled ventilation, Bland-Altman analyses (Figure 5A-C) revealed a low bias (i.e.,

297  $P_{es_{solid}} - P_{es_{bal}}$ ) [upper LoA; lower LoA] of -0.15 [1.39; -1.70], 0.32 [3.35; -2.72] and 0.47  
298 [3.79; -2.85] cmH<sub>2</sub>O for end-expiratory, end-inspiratory and  $\Delta P_{es}$  values, respectively.  
299 Patient 16 demonstrated inspiratory pressure amplifications in  $P_{es_{solid}}$  that we could not  
300 attribute to cardiac artifacts solely (Additional file 10). Removing this patient improved  
301 comparisons: bias [upper LoA; lower LoA] of -0.08 [1.43; -1.58], 0.07 [2.62; -2.49] and 0.15  
302 [2.63; -2.34] cmH<sub>2</sub>O for end-expiratory, end-inspiratory and  $\Delta P_{es}$  values, respectively.

303 Pressures obtained during static conditions are presented in Table 2; LoA were  
304 smaller (all <2 cmH<sub>2</sub>O) as compared to breath-by-breath analysis.

305 During assisted ventilation, bias remained low, but LoAs were wider, yet smaller than  
306 in healthy volunteers (Figure 6): -0.20 [5.02; -5.41], -0.54 [4.60; -5.68] and 0.35 [3.88; -3.18]  
307 cmH<sub>2</sub>O for end-expiratory, end-inspiratory and  $\Delta P_{es}$  values, respectively.

308 A total of 24 Baydur maneuvers from the solid-state catheter were analyzed to  
309 determine sensor stability (for n=12 patients in controlled ventilation (2 missing as  
310 acquisition started after balloon calibration) and for n=12 patients in assisted mode). The  
311 mean  $\Delta P_{es_{solid}}/\Delta P_{aw}$  ratio was  $1.05 \pm 0.18$  [min-max: 0.72-1.48].

312

## 313 DISCUSSION

314 We tested a new  $P_{es}$  catheter with solid-state sensor on the bench, in healthy  
315 volunteers and in ventilated patients. Findings can be summarized as: 1) the solid-state  
316 sensor demonstrated excellent agreement with a reference pressure during a 5-day bench  
317 test, without signal drift; 2) moderate to good agreements with  $P_{es_{bal}}$  during tidal breathing  
318 was found in healthy volunteers when  $P_{es_{bal}}$  was adequately calibrated; 3) these  
319 agreements improved in ventilated patients during tidal breathing (controlled and assisted

320 ventilation) and further in static conditions (breath holds); 4) the sensor remained stable  
321 throughout study recordings; 5) the solid-state Pes catheter often measured higher  $\Delta P_{es}$   
322 values, especially in healthy volunteers during high efforts.

323

#### 324 *Validity of reference pressure*

325 For our in-human comparisons, balloon Pes catheters served as “reference standard”  
326 as the true pleural pressure is not available in humans. A concern with this approach in our  
327 and previous studies[6-9] is that each balloon has an optimal filling volume, depending on  
328 its perimeter/length, and elasticity and length of connecting tubing. These characteristics,  
329 but also the balloon’s position in the esophagus and ex-vivo pressure sensor affect absolute  
330 pressure values and the balloon’s capacity to respond to Pes swings (i.e., frequency  
331 response)[10]. Furthermore, the balloon may empty over time and recommended filling  
332 volumes by manufacturers are often not optimal clinically; changes in intrathoracic pressure  
333 or chest wall compliance (e.g. change in PEEP, body position, pleural pressure  
334 inhomogeneities) require recalibration[1,3,10,11]. Indeed, uncalibrated and calibrated  
335 balloon pressures (i.e., corrected for esophageal wall and balloon elasticity) could differ at  
336 end-expiration by 5.1 cmH<sub>2</sub>O (range: 0.8 to 35.1 cmH<sub>2</sub>O) despite obtaining a Baydur range of  
337 0.8-1.2.[10] This makes the position of balloon catheters as reference standard somewhat  
338 questionable. We aimed to target higher balloon catheter accuracy for primary comparisons  
339 ( $\Delta P_{es_{bal}}/\Delta P_{aw}$  within 0.9-1.1 range) to improve comparisons, but this was sometimes  
340 challenging in healthy volunteers. A Baydur range of 0.8-1.2 is considered acceptable in  
341 literature[1] but also implies an accepted deviation of 20% from the true  $\Delta P_{es}$  value, which  
342 may impact clinical decision-making when applying Pes-based ventilation strategies.  
343 Considering the solid-state sensor stability, represented by the excellent offline obtained

344  $\Delta P_{\text{es}_{\text{solid}}}/\Delta P_{\text{aw}}$  ( $1.01 \pm 0.14$  in healthy volunteers,  $1.05 \pm 0.18$  in patients) and bench results, it  
345 can also be argued that the solid-state sensor better represented the actual ( $\Delta$ ) Pes.  
346 Studies comparing different Pes sensor types (i.e., solid-state, balloons [11], liquid-filled  
347 catheters) are therefore challenging to interpret without the clinical availability of a true  
348 reference standard.

349

### 350 *Related works*

351 Over 20 years ago, solid-state Pes catheters were compared with a balloon catheter  
352 in healthy volunteers[6,8] demonstrating reliable relative/ $\Delta$  Pes values. However,  
353 uncontrollable offset shifts (10 cmH<sub>2</sub>O for transpulmonary pressure[6]) and a high bias (>  
354 cmH<sub>2</sub>O[8]) were observed, making absolute values unreliable. Authors hypothesized that  
355 Van der Waal forces contributed to falsely high pressures (e.g., mucus sticking to sensor  
356 membrane, or contact with the esophageal wall)[6] and negative signal drifts[8]. More  
357 recent work in 2017[7] and 2021[9] comparing micro-transducers with balloon catheters  
358 report a smaller bias: end-expiratory Pes of -3.6 cmH<sub>2</sub>O[7] (vs. 1.6 cmH<sub>2</sub>O in our study) and  
359  $\Delta$  Pes of 3.8 cmH<sub>2</sub>O[9] (vs. 3.9 cmH<sub>2</sub>O in our study), respectively.

360 The smaller[6, 8] or comparable[7, 9] biases in our healthy volunteers can be  
361 explained as follows. First, our solid-state catheter includes a small balloon above the sensor  
362 serving as a stabilizer to avoid sensor sticking to the esophageal wall; this likely also kept  
363 mucus off the sensor membrane, avoiding signal drifts. Second, the sensor is both  
364 temperature and humidity calibrated. Yet, in some subjects/patients large differences with  
365  $P_{\text{es}_{\text{bal}}}$  were found, which may be explained by the sensor's fast frequency response: since  
366 pressures are measured directly inside the esophagus signal dampening is avoided, but  
367 artifacts can be easily amplified. Cardiac artifacts in  $P_{\text{es}_{\text{solid}}}$  were sometimes high and body



368 position dependent (e.g., more marked in supine position, see Additional file 11, in line  
369 with[8]), and more negative Pes values were observed with larger inspiratory efforts (Figure  
370 2). This warrants careful identification and interpretation of artifacts, improved signal  
371 filtering at the bedside, and/or optimizing the sensor positioning. The smaller biases and  
372 LoA in ICU patients as compared to healthy volunteers could be explained by the stable  
373 ventilator settings and the low variability in breathing efforts during assisted mode. In  
374 addition, body position alterations were not part of the patient study.

375

### 376 *Strengths and limitations*

377 This is the first study validating a novel solid-state Pes catheter, combining bench  
378 work with measurement in healthy volunteers and ICU patients during different ventilation  
379 modes. The use of the solid-state Pes catheter was considered easy: it requires only one  
380 calibration prior to insertion and pressures are measured directly in the esophagus – hence,  
381 some secondary limitations of balloon catheters (e.g., need for precise filling volume, risks  
382 of balloon emptying over time) are not applicable. In contrast, with the sensor’s fast  
383 response time, there is a possibility of pressure amplifications related to e.g., cardiac  
384 artifacts as discussed above. Our study also has some limitations. First, we used two  
385 different balloon catheters in the patient study, which was initially designed with the  
386 Nutrivent catheter as comparator, but significant interference was observed. Second,  
387 several short sections were excluded from the analysis due to artifacts in both signals  
388 and/or unreliable  $Pes_{bal}$  tracings. Nevertheless, when selecting stable tracings where the  
389 balloon was properly calibrated, good agreement between  $Pes_{bal}$  and  $Pes_{solid}$  was found.  
390 Since our sample size was larger than necessary, excluding some tracings likely did not  
391 affect power of our analyses. Third, in healthy volunteers we measured positive and high

392 end-expiratory Pes values, likely the result of inspiratory effort maneuvers and/or cardiac  
393 artifacts. In addition, two patients demonstrated unphysiologically high Pes<sub>solid</sub> values (see  
394 Results) despite proper calibration, reposition attempts and verification of esophageal  
395 positioning. Last, we did not perform multiple-day testing of the solid-state catheter in the  
396 ICU, but extensive bench tests demonstrated only minimal signal drift over 5 days.

397

### 398 *Clinical relevance*

399 Pes monitoring allows individualization of ventilator settings via a more thorough  
400 understanding of the mechanical properties of the respiratory system. Over the last years,  
401 use of the balloon catheters has improved with the availability of dedicated monitors or  
402 ventilator connections. Yet, measurements remain technically challenging and widespread  
403 routine implementation is lacking. The solid-state catheter requires only one calibration  
404 prior to insertion, contributing to its ease of use. This makes the technique interesting for  
405 future implementation, also in the light of the recent regulatory challenges such as the  
406 medical device regulation in the European Union, which has put extensive pressure on the  
407 production of medical devices, resulting in limited availability and even withdrawal of  
408 certain balloon catheters from the market. Future work should focus on the longer-term use  
409 of the technique, e.g., in multiple-day measurements within a Pes-guided ventilation  
410 strategy, and optimizing filtering of (cardiac) artifacts and (automated) signal quality checks.

411 In conclusion, this is the first study validating a novel solid-state Pes catheter in vitro,  
412 in healthy volunteers and in postoperative mechanically ventilated ICU-patients, with  
413 promising results. This could contribute to the implementation of Pes as advanced  
414 respiratory monitoring technique.

415 LIST OF ABBREVIATIONS

|     |                    |                                                                 |
|-----|--------------------|-----------------------------------------------------------------|
| 416 | BMI                | Body Mass Index                                                 |
| 417 | ICU                | Intensive Care Unit                                             |
| 418 | iEPC               | Intelligent Esophageal Pressure Catheter                        |
| 419 | iEPMS              | Intelligent Esophageal Pressure Monitoring System               |
| 420 | LoA                | Limit of Agreement                                              |
| 421 | Paw                | Airway pressure                                                 |
| 422 | Pes                | Esophageal pressure                                             |
| 423 | Pes <sub>bal</sub> | Esophageal pressure measured by balloon catheter                |
| 424 | P <sub>ref</sub>   | Reference pressure                                              |
| 425 | P <sub>solid</sub> | Esophageal pressure measured by the solid-state pressure sensor |

426 DECLARATIONS

427 **Ethics approval and consent to participate**

428 This study was approved by the local medical ethics committee of the Vrije Universiteit medical  
429 center (METc 2020.470) and Erasmus Medical Center (MEC-2023-0119). All healthy subjects and  
430 patients provided written informed consent prior to participation.

431

432 **Consent for publication**

433 Not applicable

434

435 **Availability of data and materials**

436 The datasets used and/or analyzed during the current study are available from the corresponding  
437 author upon reasonable request.

438

439 **Competing interests**

440 RF and RS are employed by Pulmotech B.V. AJ and LH received research funding (paid to the  
441 institution) of Pulmotech B.V. for the conduct of the study.

442

443 **Funding**

444 The study was partially funded by a grant from Pulmotech B.V., Leek, The Netherlands.

445

446 **Authors contributions**

447 Concept: AHJ, RF, LH; Design: LH, AHJ; Data acquisition bench study: RF, RS; Data acquisition healthy  
448 volunteers: AM, LH, AHJ; Data acquisition patients: JPvO, NG, RF, RS, AHJ; Data analysis: JPvO, NG,  
449 AM, RF, MF, LH, AHJ; Data interpretation: all authors; Manuscript drafting: JPvO, NG, AHJ;  
450 Supervision: LH, AHJ; Manuscript revising for intellectual content and final approval: all authors.

451

452 **Acknowledgements**

453 We thank all healthy volunteers and patients that were willing to contribute to the study.

454 REFERENCES

- 455 1. Jonkman AH, Telias I, Spinelli E, *et al.* **The oesophageal balloon for respiratory monitoring in**  
456 **ventilated patients: updated clinical review and practical aspects.** *Eur Respir Rev* 2023; 32:  
457 220186
- 458 2. Talmor D, Sarge T, Malhotra A, *et al.* **Mechanical ventilation guided by esophageal pressure**  
459 **in acute lung injury.** *N Engl J Med.* 2008;359(20):2095-2104.
- 460 3. Akoumianaki E, Maggiore SM, Valenza F, *et al.* **The Application of Esophageal Pressure**  
461 **Measurement in Patients with Respiratory Failure.** *Am J Respir Crit Care Med.*  
462 2014;189(5):520-531.
- 463 4. Brochard L. **Measurement of esophageal pressure at bedside: pros and cons.** *Curr Opin Crit*  
464 *Care.* 2014;20(1):39-46.
- 465 5. Mojoli F, Iotti GA, Torriglia F, *et al.* **In vivo calibration of esophageal pressure in the**  
466 **mechanically ventilated patient makes measurements reliable.** *Crit Care.* 2016:1-9.
- 467 6. Peters RJA, Meijer H, Kingma R, *et al.* **Evaluation of catheter-mounted transducers for intra-**  
468 **oesophageal pressure recording in respiratory function tests.** *Med Biol Eng Comput.*  
469 1998;36(5):562-7.
- 470 7. Augusto R, Albuquerque A, Jaeger T, *et al.* **Stability and Agreement of a Microtransducer**  
471 **and an Air-Filled Balloon Esophageal Catheter in the Monitoring of Esophageal Pressure.**  
472 *Respir Care.* 2017;62(2):215-221.
- 473 8. Stell IM, Tompkins S, Lovell AT, *et al.* **An in vivo comparison of a catheter mounted pressure**  
474 **transducer system with conventional balloon catheters.** *Eur Respir J* 1999; 13: 1158-1163.
- 475 9. MacAskill W, Hoffman B, Johnson MA, *et al.* **Pressure measurement characteristics of a**  
476 **micro-transducer and balloon catheters.** *Physiol Rep.* 2021;9:14831
- 477 10. Cammarota G, Lauro G, Santangelo E, *et al.* **Mechanical Ventilation Guided by Uncalibrated**  
478 **Esophageal Pressure May Be Potentially Harmful.** *Anesthesiology* 2020; 133:145–53
- 479 11. Mojoli F, Chiumello D, Pozzi M, Algieri I, *et al.* **Esophageal pressure measurements under**  
480 **different conditions of intrathoracic pressure. An in vitro study of second generation**  
481 **balloon catheters.** *Minerva Anesthesiol* 2015;81: 855-64

482  
483  
484  
485  
486

487 TABLES

**Table 1** Main characteristics of the study population

| Characteristic                        | Total (N = 16)                           |                                        |
|---------------------------------------|------------------------------------------|----------------------------------------|
| Age, years; median (IQR)              | 65 (58 - 69)                             |                                        |
| Male, sex; n (%)                      | 15 (94)                                  |                                        |
| BMI kg/m <sup>2</sup> ; median (IQR)  | 26.7 (25.0 - 29.7)                       |                                        |
| IBW, kg; median (IQR)                 | 76.9 (68.1 - 79.2)                       |                                        |
| Medical history (n)                   |                                          |                                        |
| Asthma                                | 1                                        |                                        |
| Non-obstructive emphysema             | 1                                        |                                        |
| Coronary artery disease               | 6                                        |                                        |
| Renal Failure                         | 2                                        |                                        |
| Type of surgery performed (n)         |                                          |                                        |
| CABG                                  | 5                                        |                                        |
| CABG + AVR                            | 2                                        |                                        |
| ROSS procedure                        | 2                                        |                                        |
| MVP-MIC                               | 3                                        |                                        |
| AVR                                   | 4                                        |                                        |
|                                       | Controlled ventilation<br>(median (IQR)) | Assisted ventilation<br>(median (IQR)) |
| Respiratory parameters                |                                          |                                        |
| PEEP set (cmH <sub>2</sub> O)         | 7 (7 - 8)                                | 7 (6 - 8)                              |
| PEEP total (cmH <sub>2</sub> O)       | 8.5 (7.7 - 9.1)                          | N/A                                    |
| PC/PS above PEEP (cmH <sub>2</sub> O) | 11 (10 - 13.3)                           | 7 (5 - 8)                              |
| Pplat (cmH <sub>2</sub> O)            | 17 (16.2 - 19.7)                         | N/A                                    |
| Driving Pressure (cmH <sub>2</sub> O) | 9.5 (7.7-10.7)                           | N/A                                    |
| Pocc (cmH <sub>2</sub> O)             | N/A                                      | 12.7 (8.4 - 17.3)                      |
| RR (/min)                             | 16 (16 - 18)                             | 13 (9 - 15)                            |
| Tidal Volume (mL)                     | 484 (448 - 568)                          | 689 (459 - 856)                        |
| Minute Volume (L/min)                 | 7.9 (7.0 - 8.7)                          | 6 (5.6 - 7.3)                          |
| FiO <sub>2</sub>                      | 30 (30 - 41)                             | 35 (30 - 41)                           |
| SpO <sub>2</sub>                      | 98 (97 - 98)                             | 98 (97 - 99)                           |
| EtCO <sub>2</sub>                     | 5.4 (4.6 - 5.9)                          | 6.8 (5.8 - 7.3)                        |
| Hemodynamic parameters                |                                          |                                        |
| Heart rate (/min)                     | 75 (68 - 81)                             | 82 (79 - 90)                           |
| BP systolic (mmHg)                    | 103 (94 - 109)                           | 138 (122 - 154)                        |
| BP diastolic (mmHg)                   | 56 (53 - 59)                             | 65 (61 - 68)                           |
| MAP (mmHg)                            | 70 (66 - 74)                             | 85 (80 - 95)                           |

*Abbreviations: AVR aortic valve replacement, BMI body mass index, BP Blood pressure, IBW ideal body weight, CABG coronary artery bypass graft, EtCO<sub>2</sub> End-tidal CO<sub>2</sub>, FiO<sub>2</sub> fraction of inspired oxygen, IQR interquartile Range, MAP Mean Arterial Pressure, MVP mitral valve repair, MIC minimal invasive surgery, PEEP positive end-expiratory pressure, PC pressure control, PS Pressure Support, Pplat plateau pressure, Pocc occlusion pressure, RR Respiratory Rate, ROSS procedure aortic valve replacement with own pulmonary valve and pulmonary allograft, SpO<sub>2</sub> oxygen saturation*

**Table 2** Static comparisons for Pes<sub>solid</sub> – Pes<sub>bal</sub> (controlled ventilation)<sup>1</sup>

|                                       | Expiratory hold | Inspiratory hold | ΔPes  |
|---------------------------------------|-----------------|------------------|-------|
| Mean difference (cmH <sub>2</sub> O)  | -0.21           | -0.36            | -0.15 |
| SD of difference (cmH <sub>2</sub> O) | 0.90            | 0.77             | 0.76  |
| Upper LoA (cmH <sub>2</sub> O)        | 1.56            | 1.16             | 1.33  |
| Lower LoA (cmH <sub>2</sub> O)        | -1.98           | -1.87            | -1.63 |

<sup>1</sup>Patient 16 was removed from this analysis due to unphysiological inspiratory and delta Pes values.

488 FIGURE LEGENDS

489 **Figure 1.** Bench results over a 120-hour measurement period, for the minimum pressures (A),  
490 maximum pressures (B) and delta pressures (C). Black line represents the mean difference (bias, i.e.  
491 solid-state catheter pressure ( $P_{solid}$ ) minus reference pressure ( $P_{ref}$ )), dashed gray lines are the  
492 upper and lower limits of agreement.

493

494 **Figure 2.** Examples of tracings obtained in two different healthy volunteers, during unloaded tidal  
495 breathing in supine (A) and sitting (B) position.

496

497 **Figure 3.** Bland-Altman results for healthy volunteers. Each color represents a different subject.

498

499 **Figure 4.** Examples of tracings obtained in four different patients during controlled ventilation (A, B)  
500 and assisted ventilation (C, D).

501

502 **Figure 5.** Bland-Altman results for patients on controlled ventilation. Each color represents a  
503 different patient.

504

505 **Figure 6.** Bland-Altman results for patients on assisted ventilation. Each color represents a different  
506 patient; subject's color coding is similar for Figure 5.

A. Minimum pressures

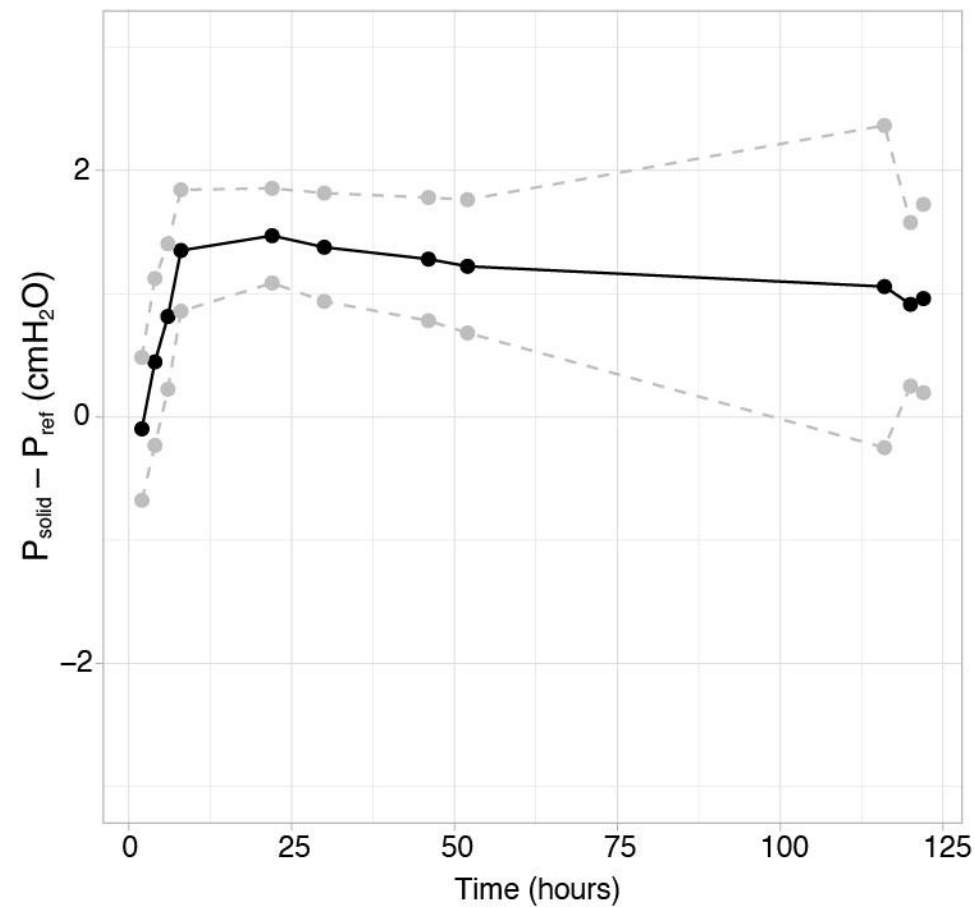

B. Maximum pressures

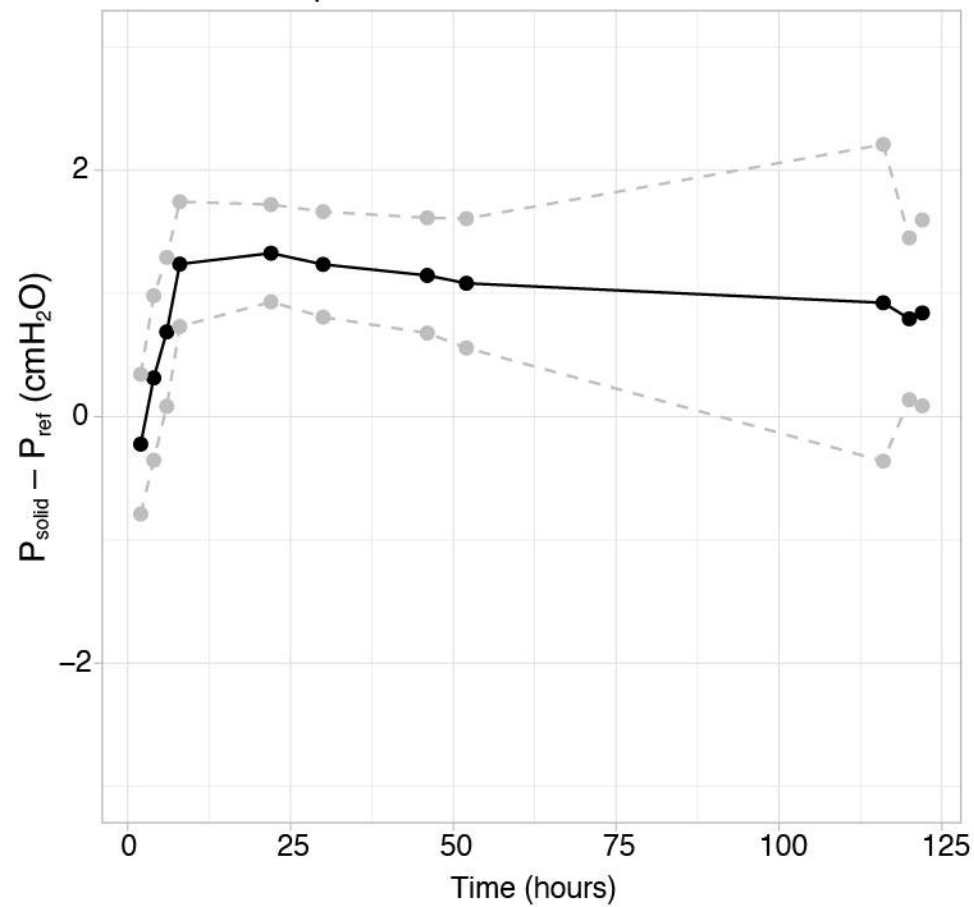

C. Delta pressures

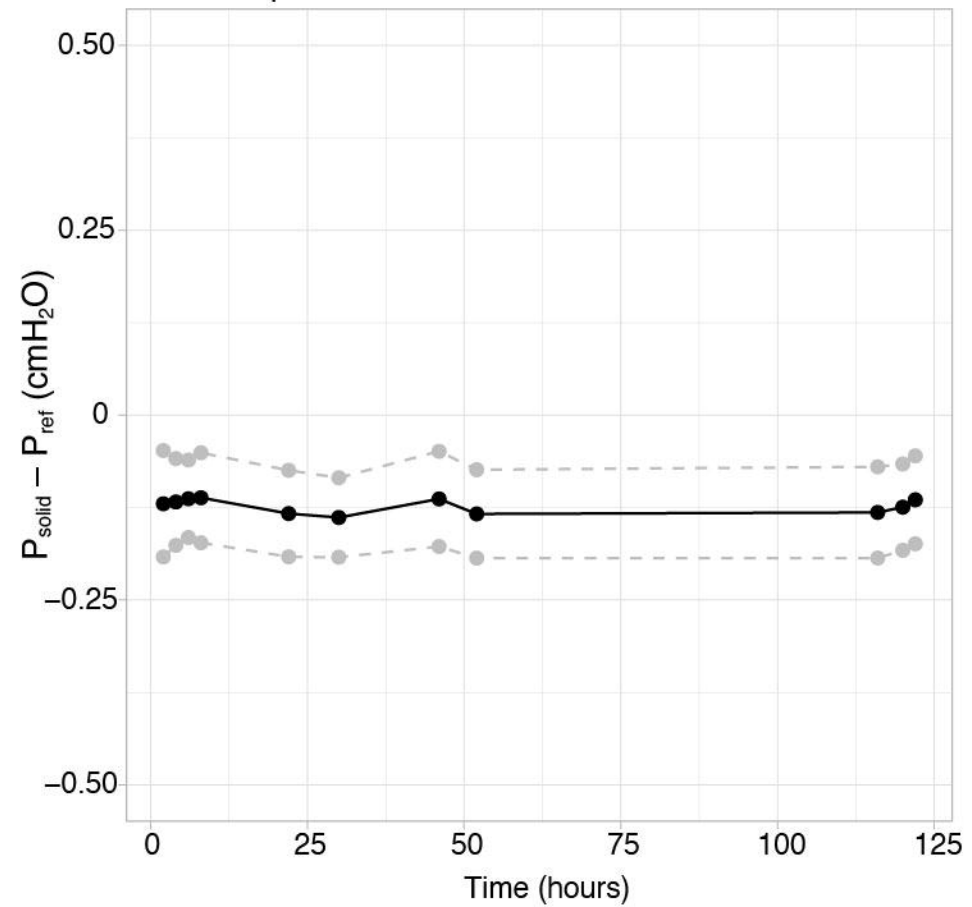



### A. Example 1: healthy volunteer, tidal breathing in supine position

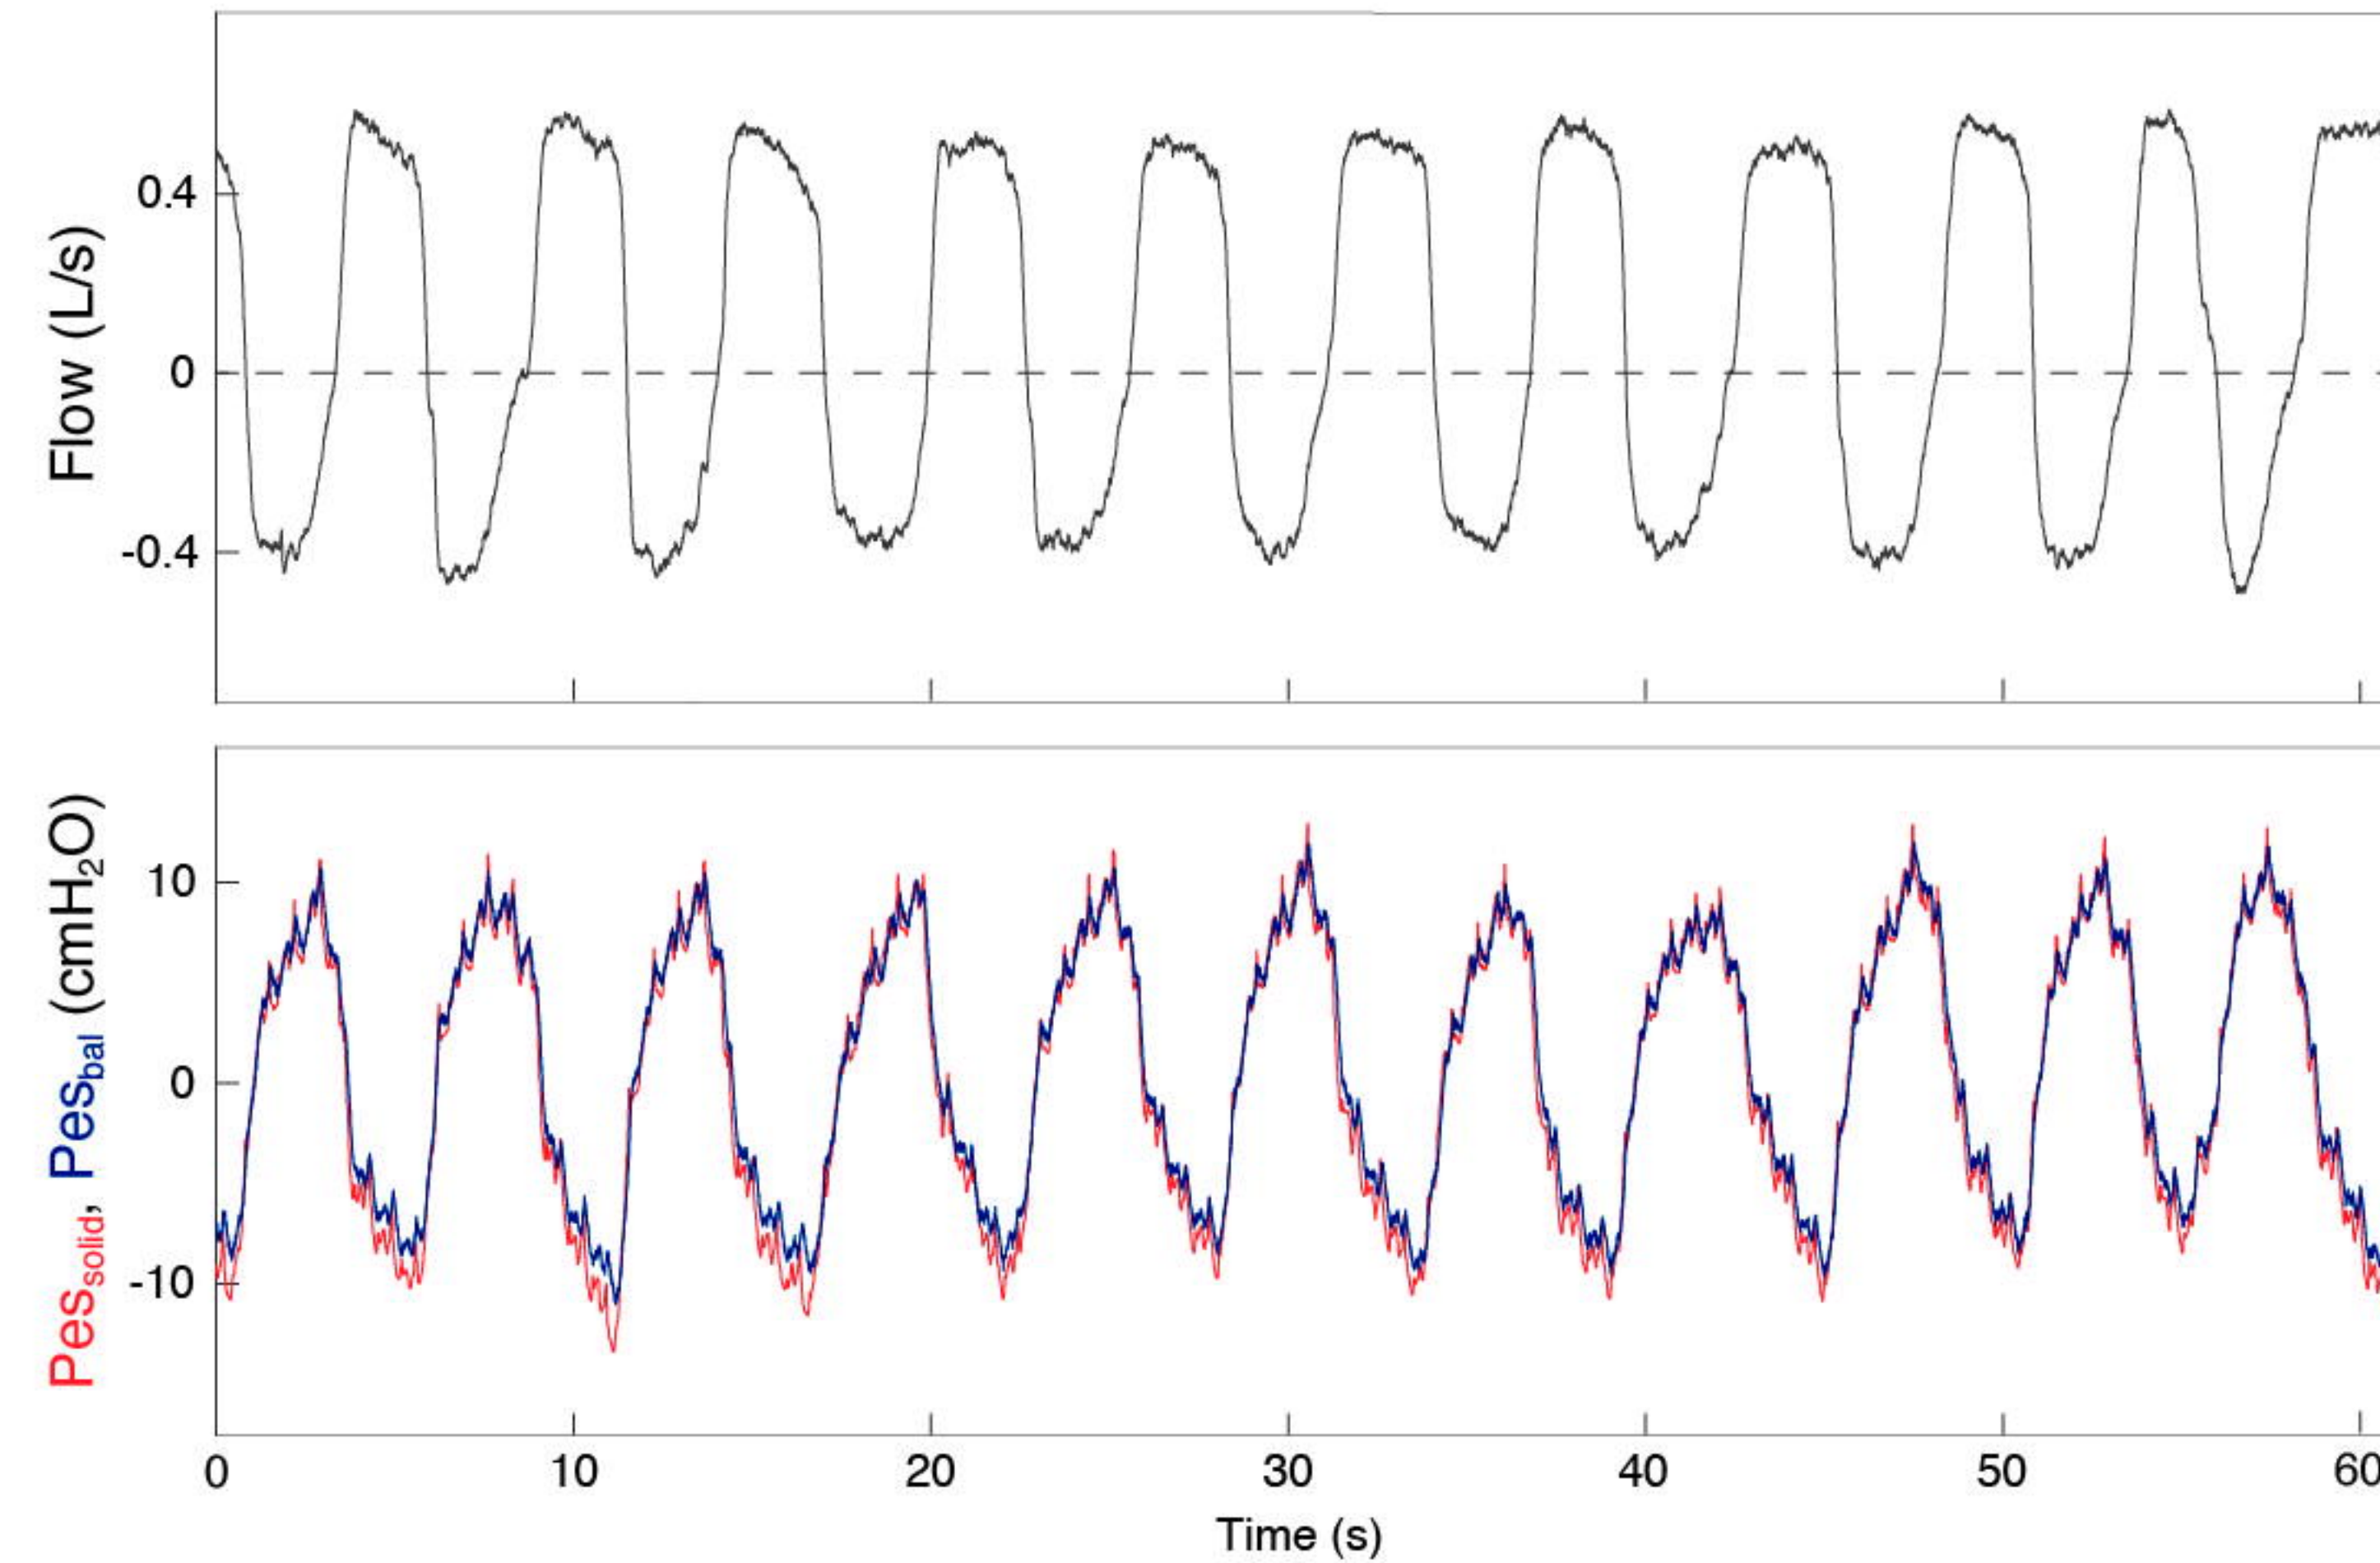

### B. Example 2: healthy volunteer, tidal breathing in sitting position

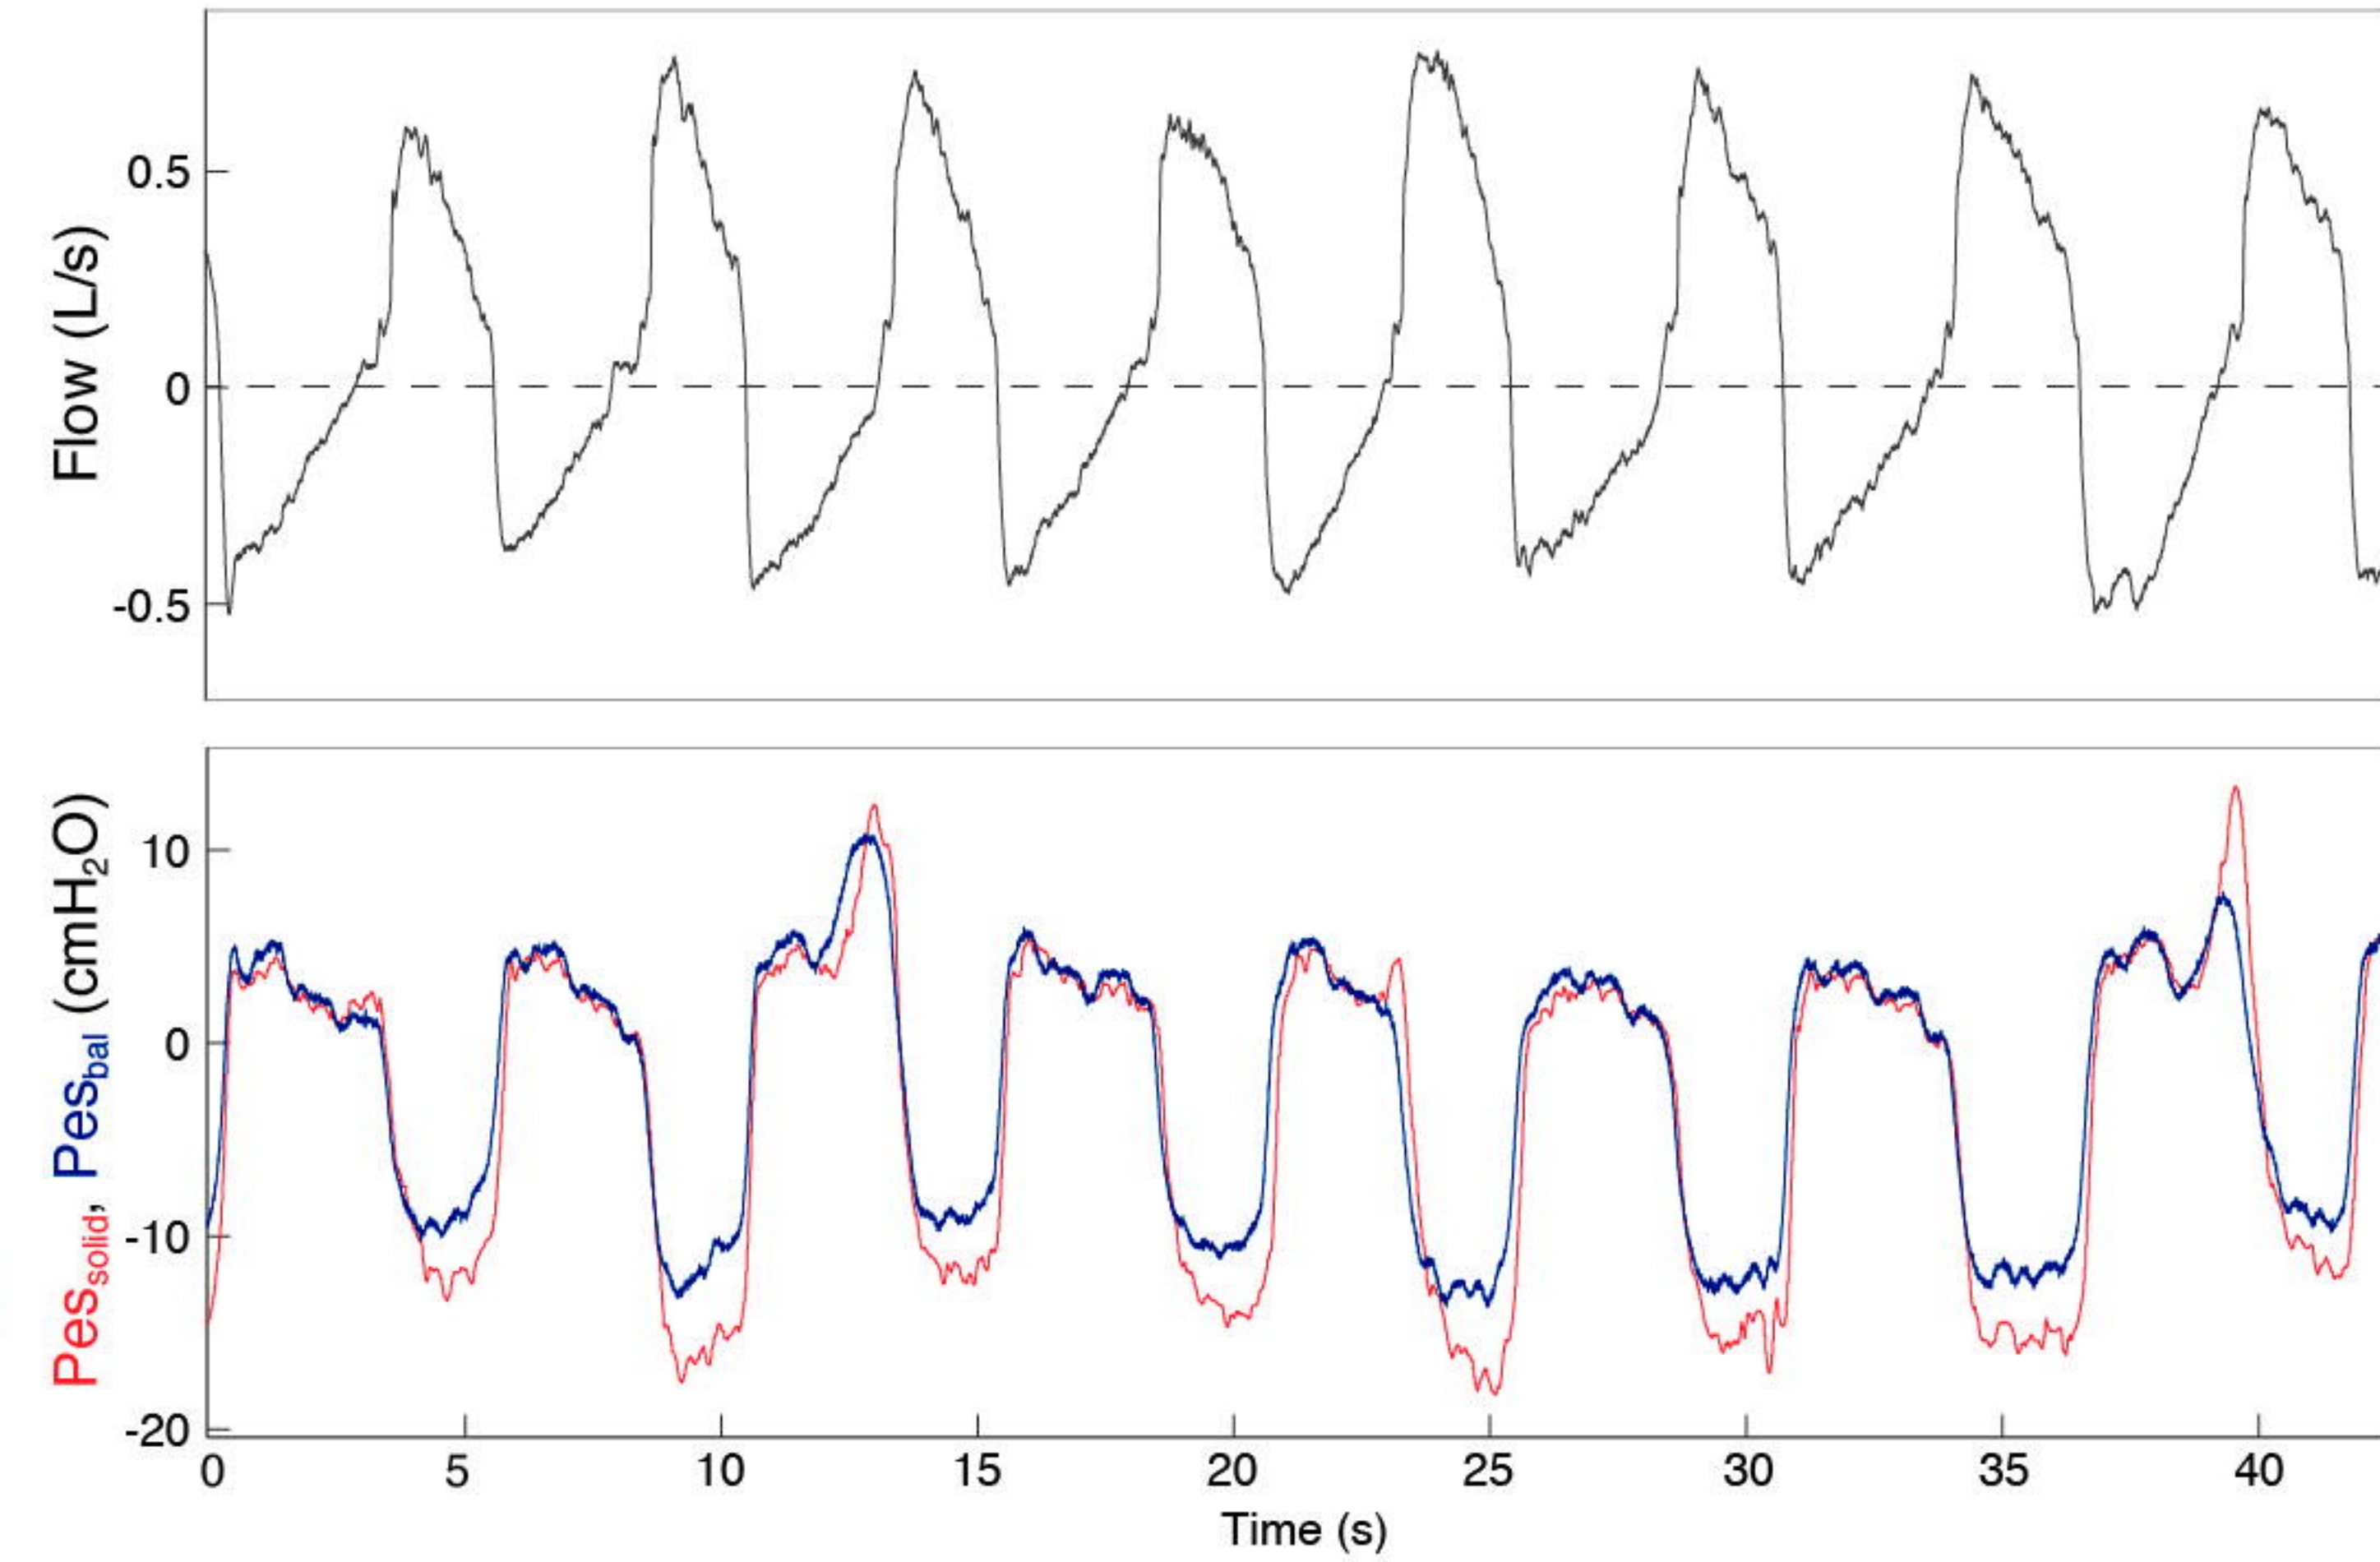

### A. End-expiratory Pes

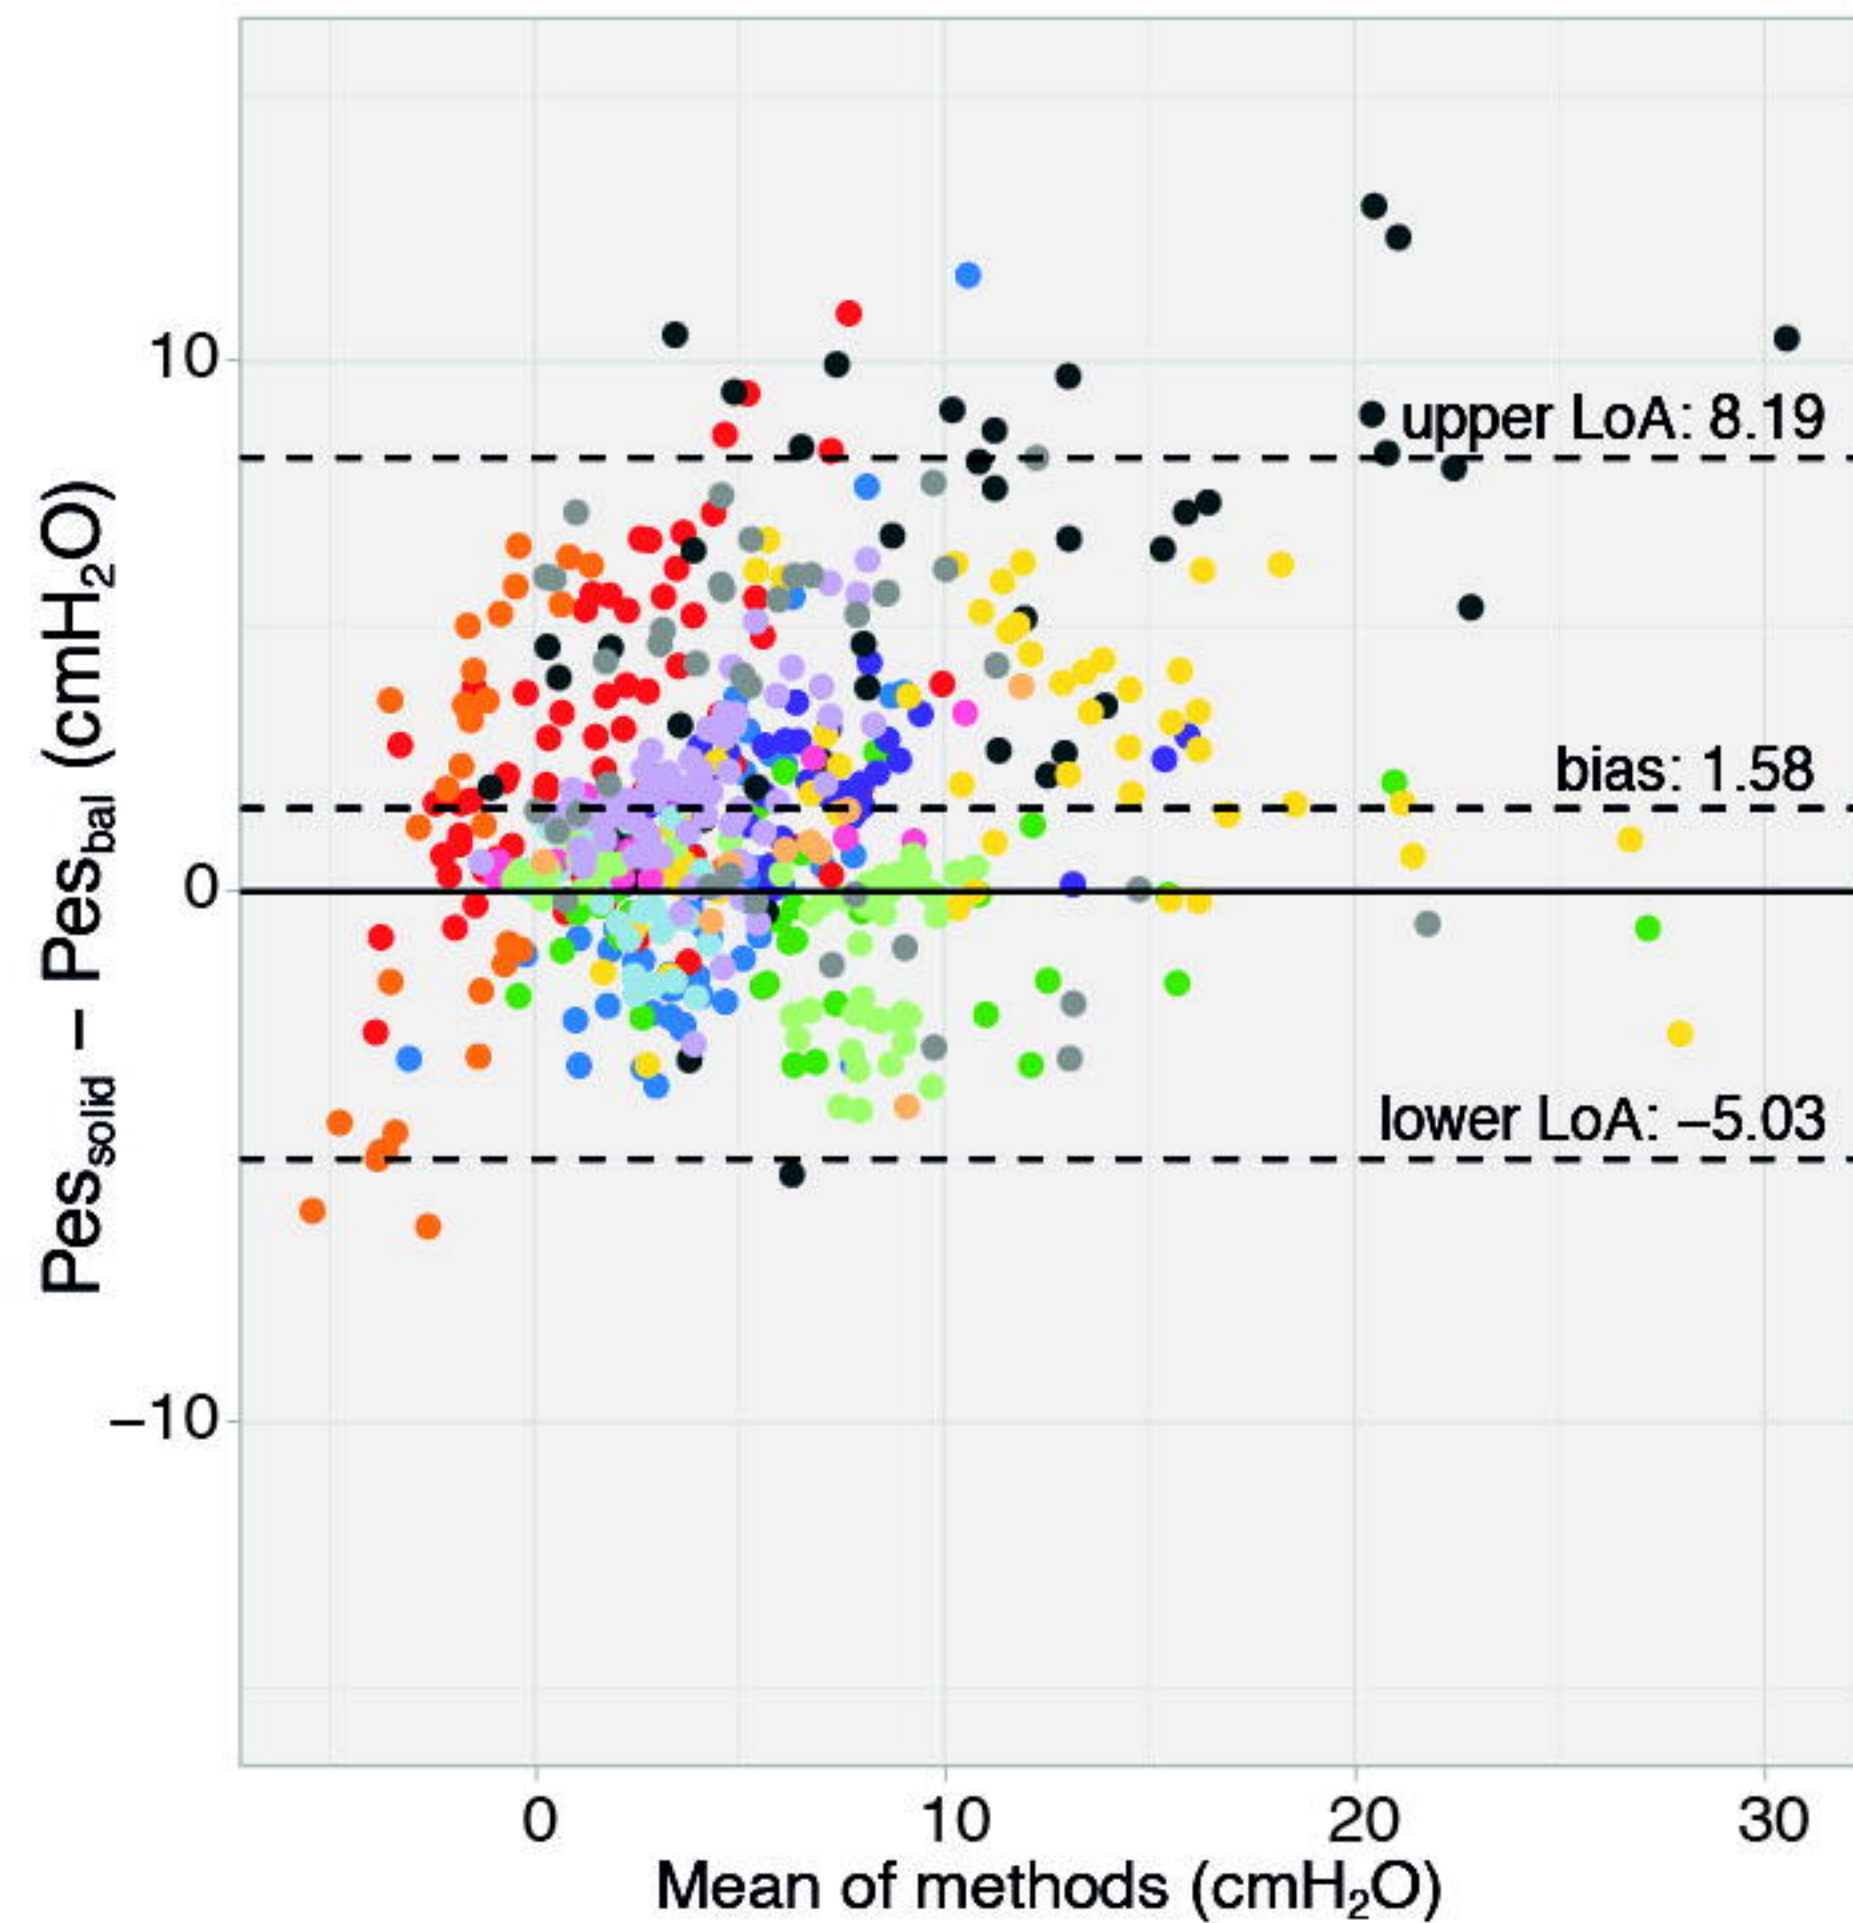

### B. End-inspiratory Pes

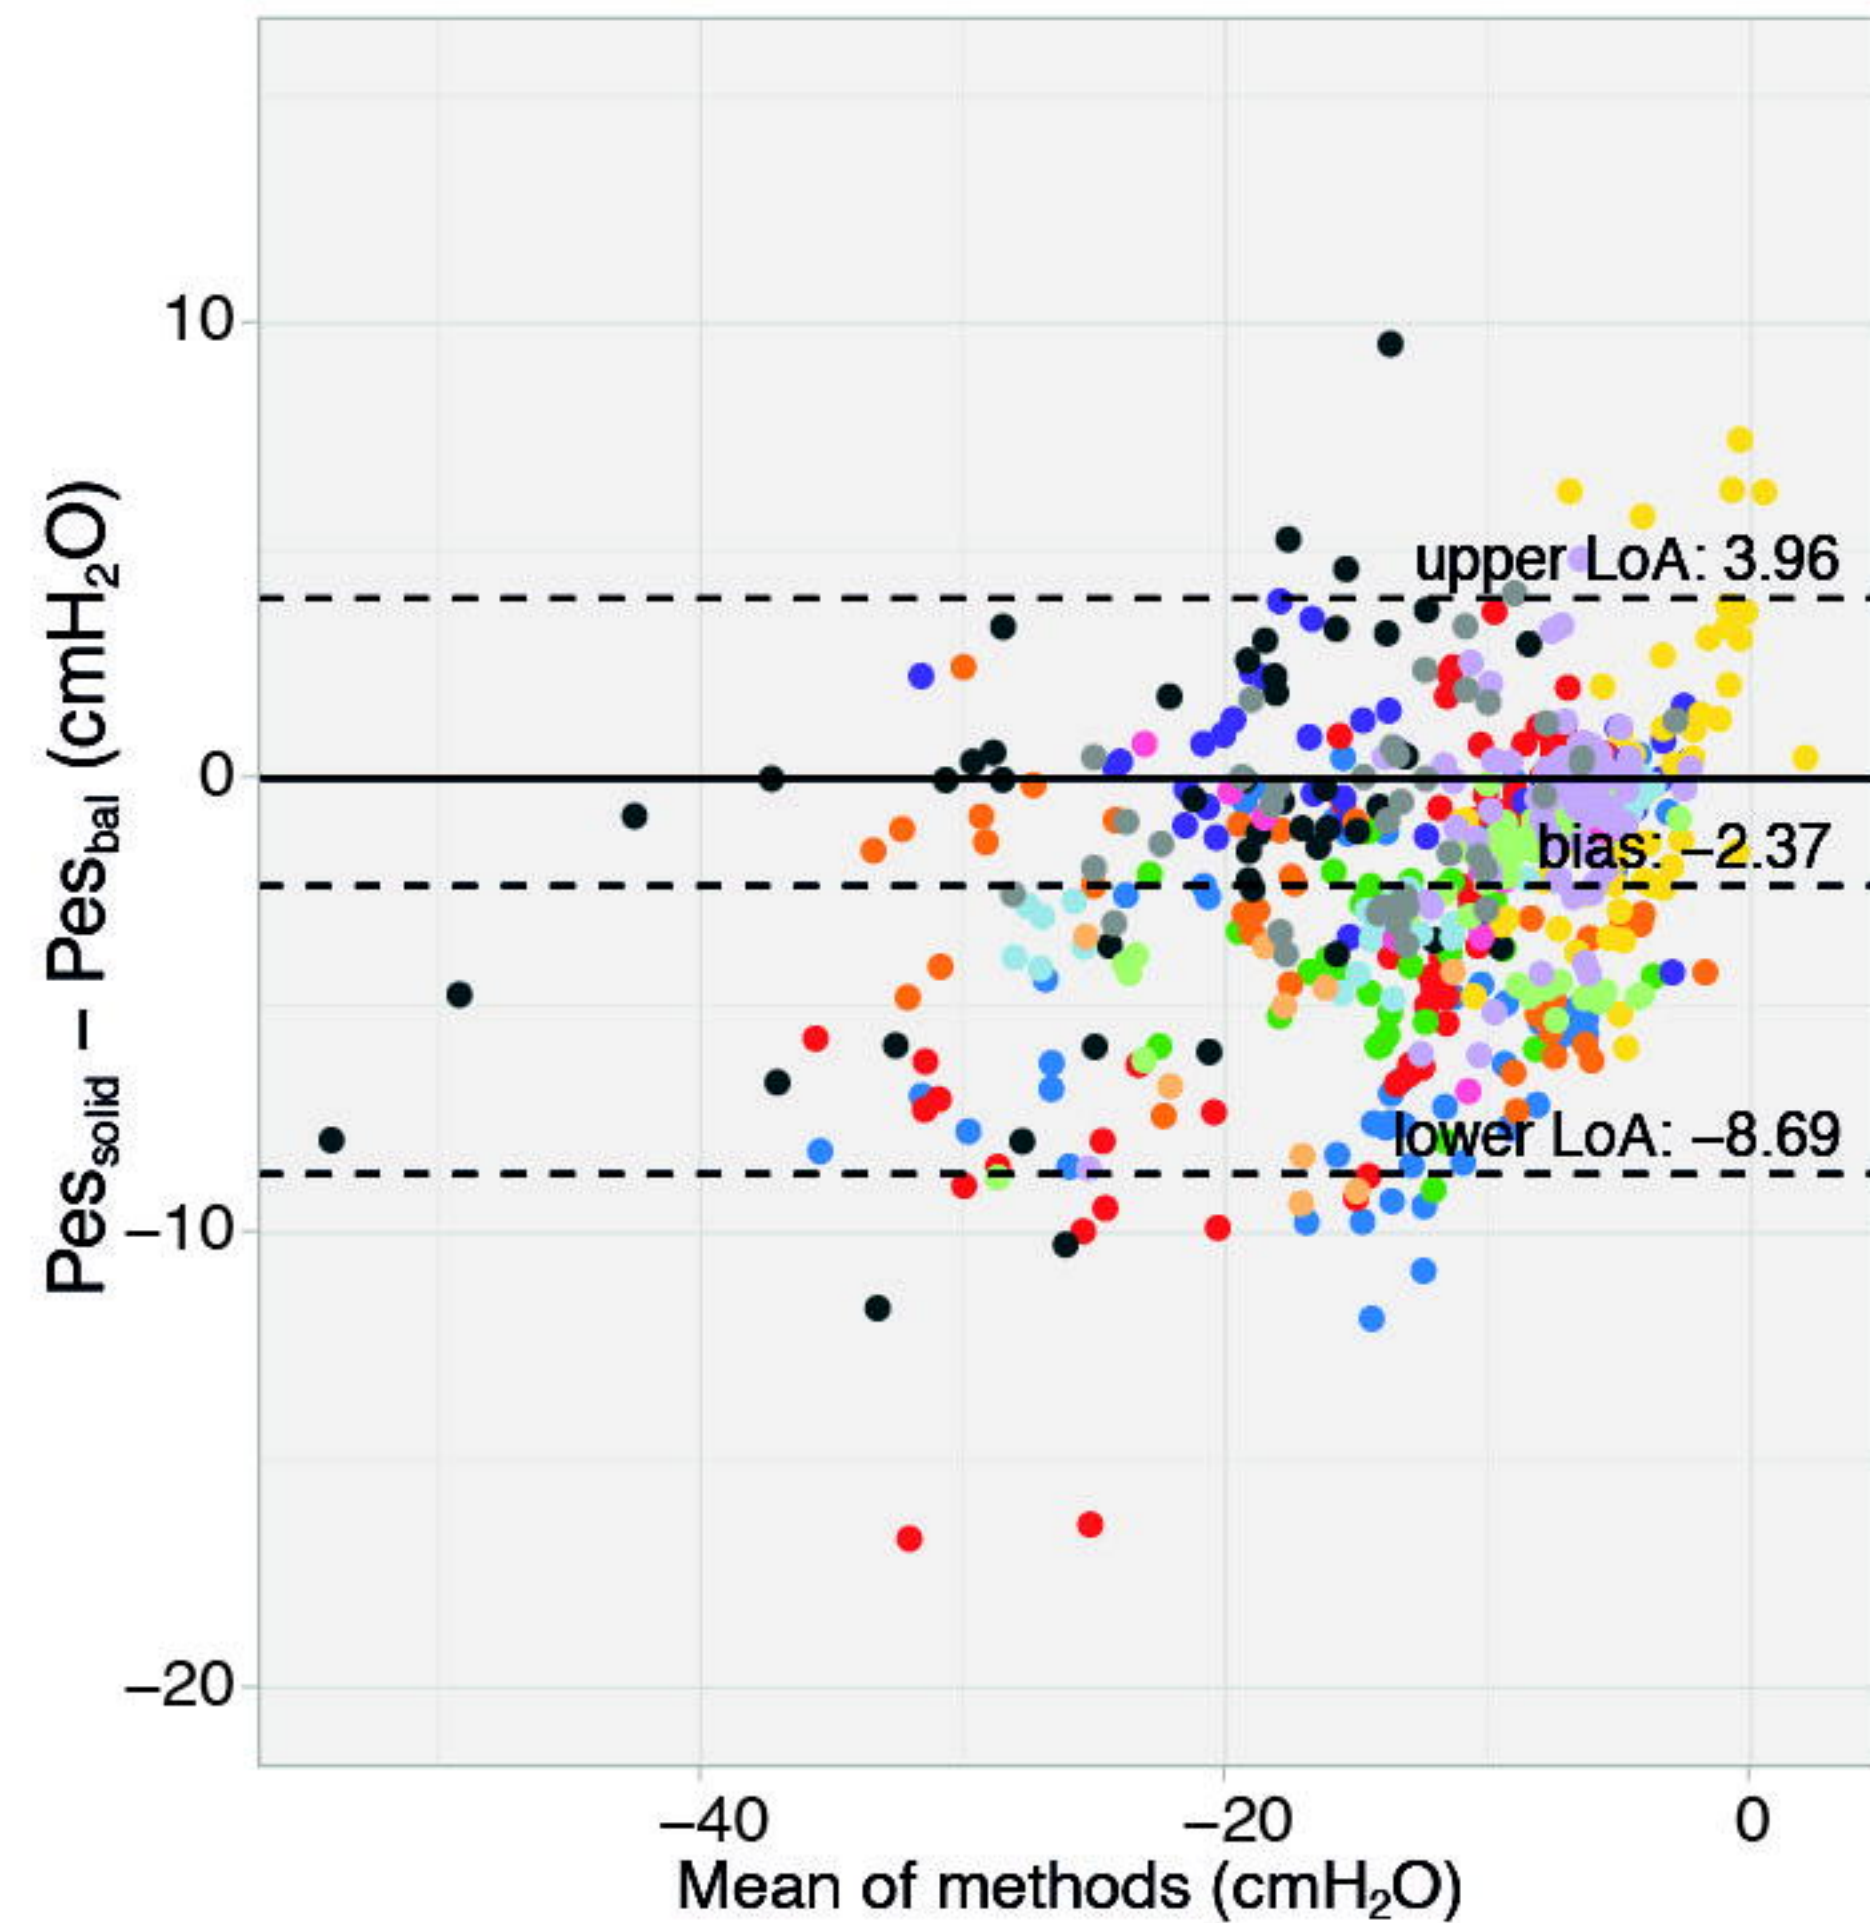

### C. $\Delta$ Pes

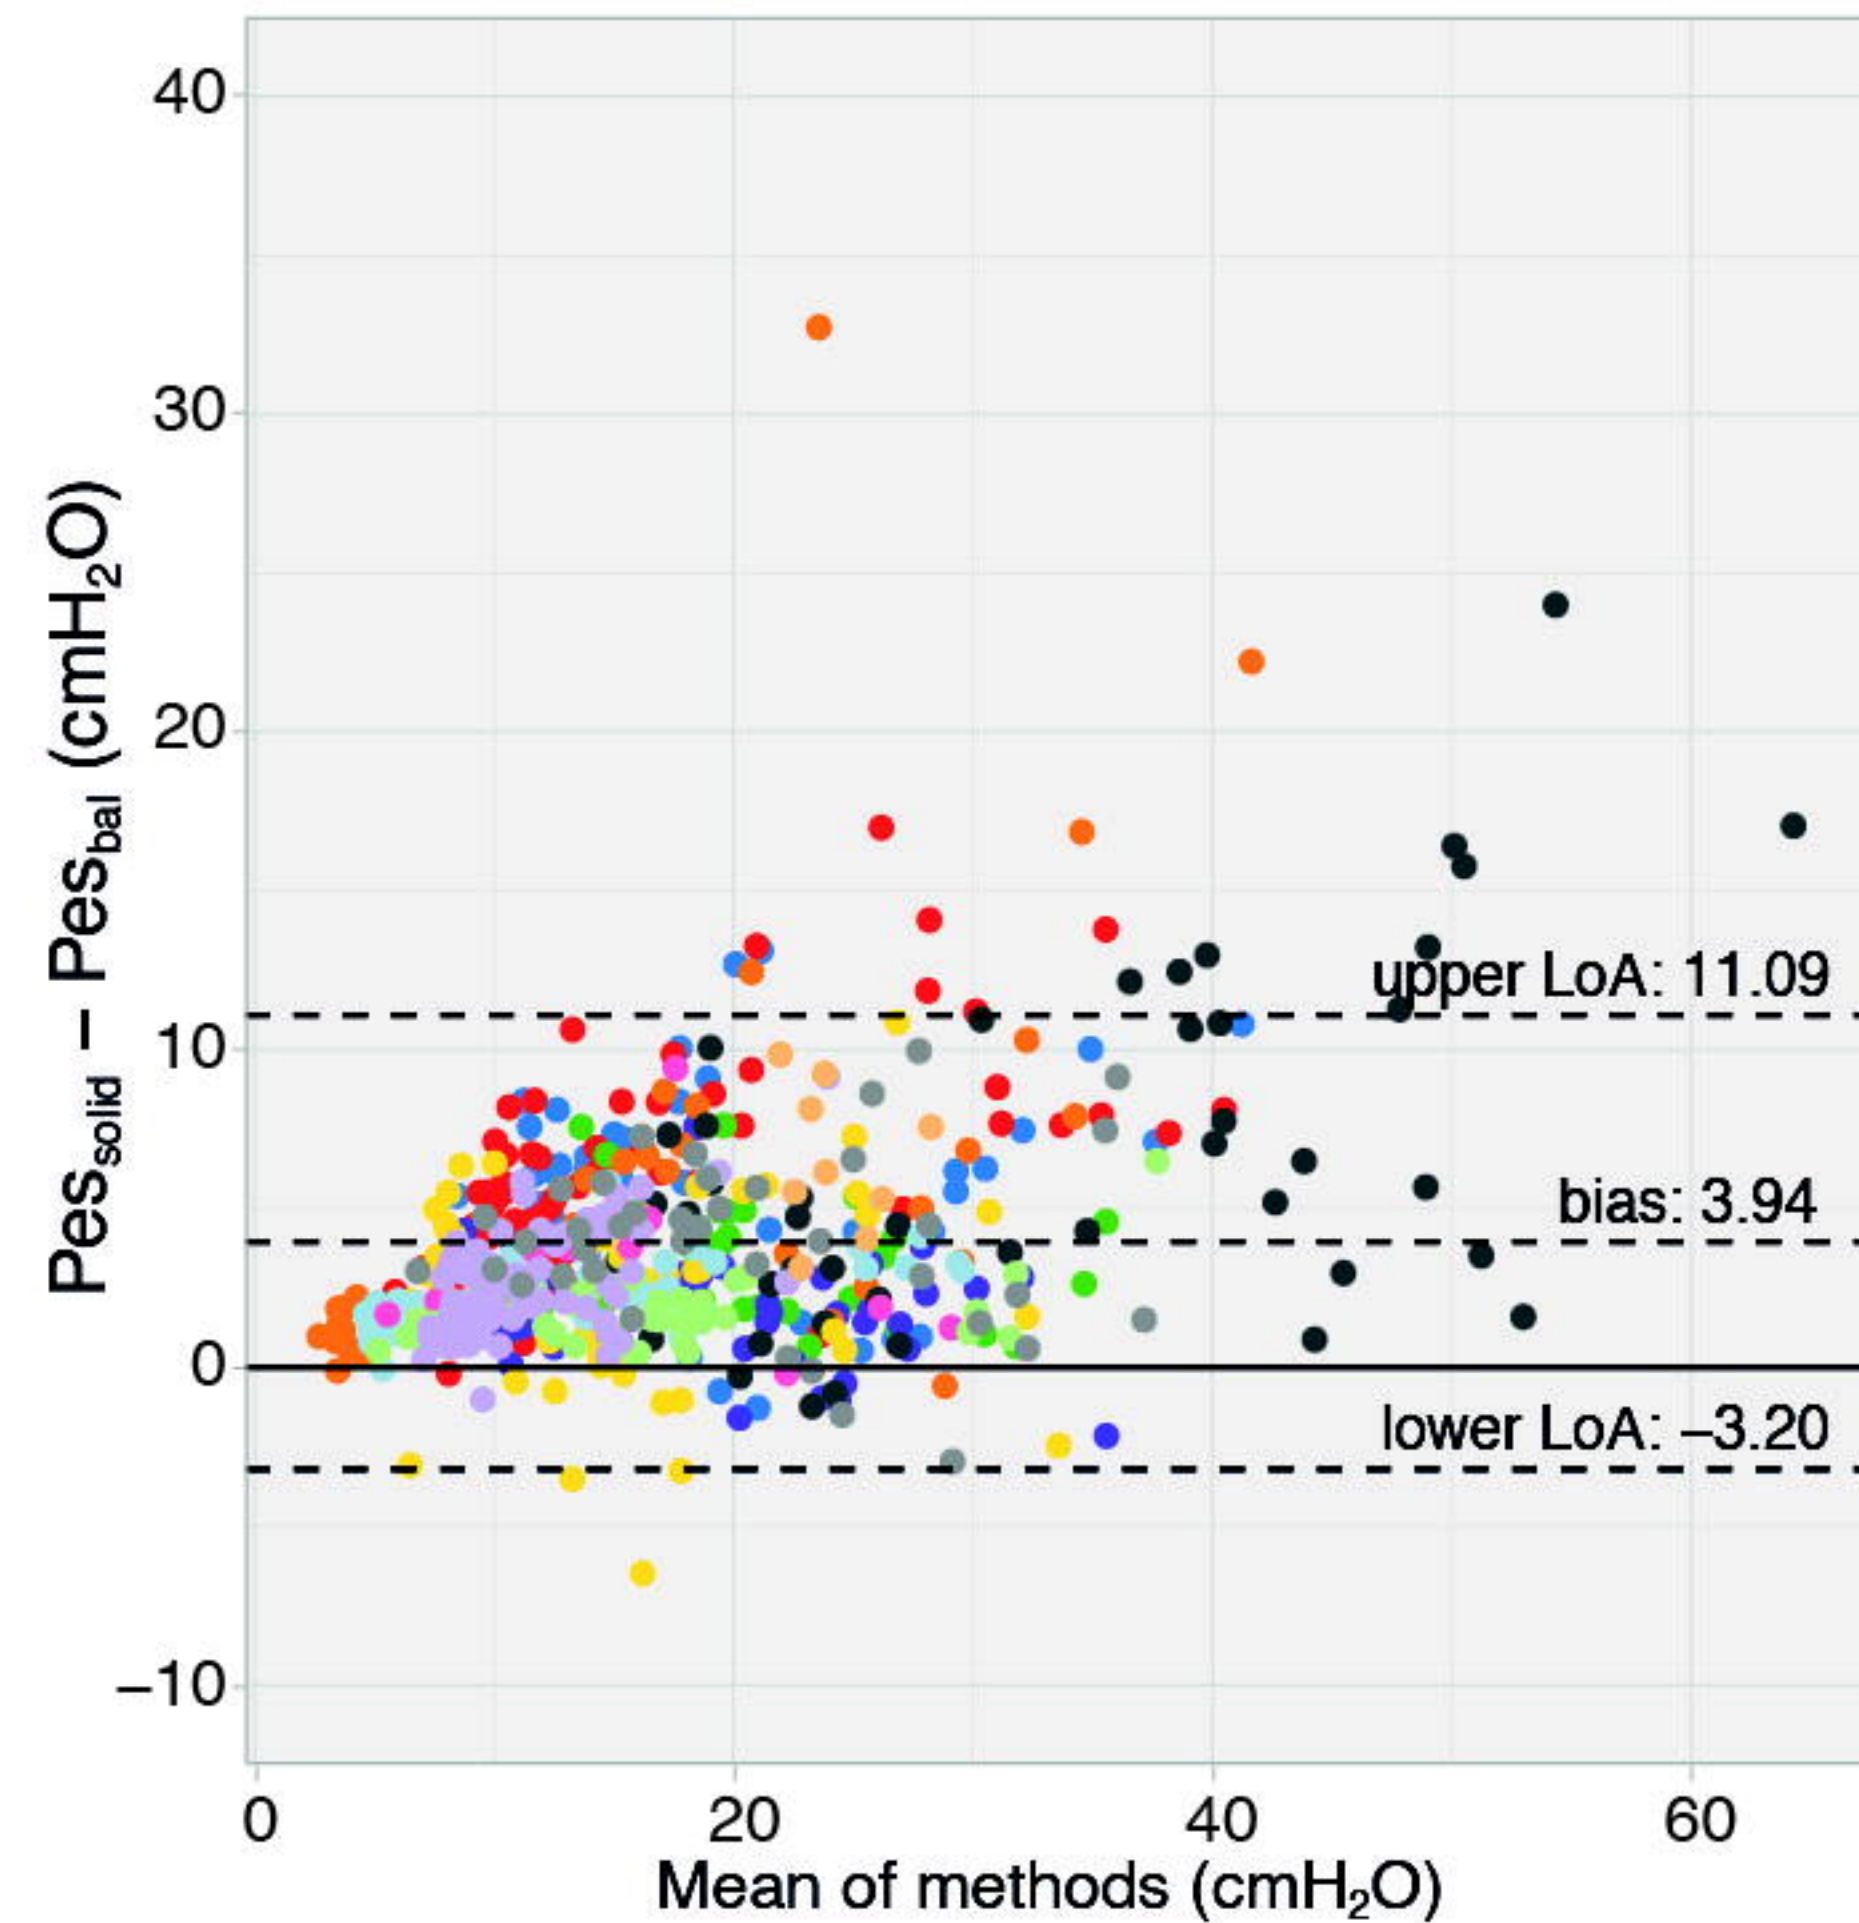

**A. Example 1: patient, controlled ventilation**

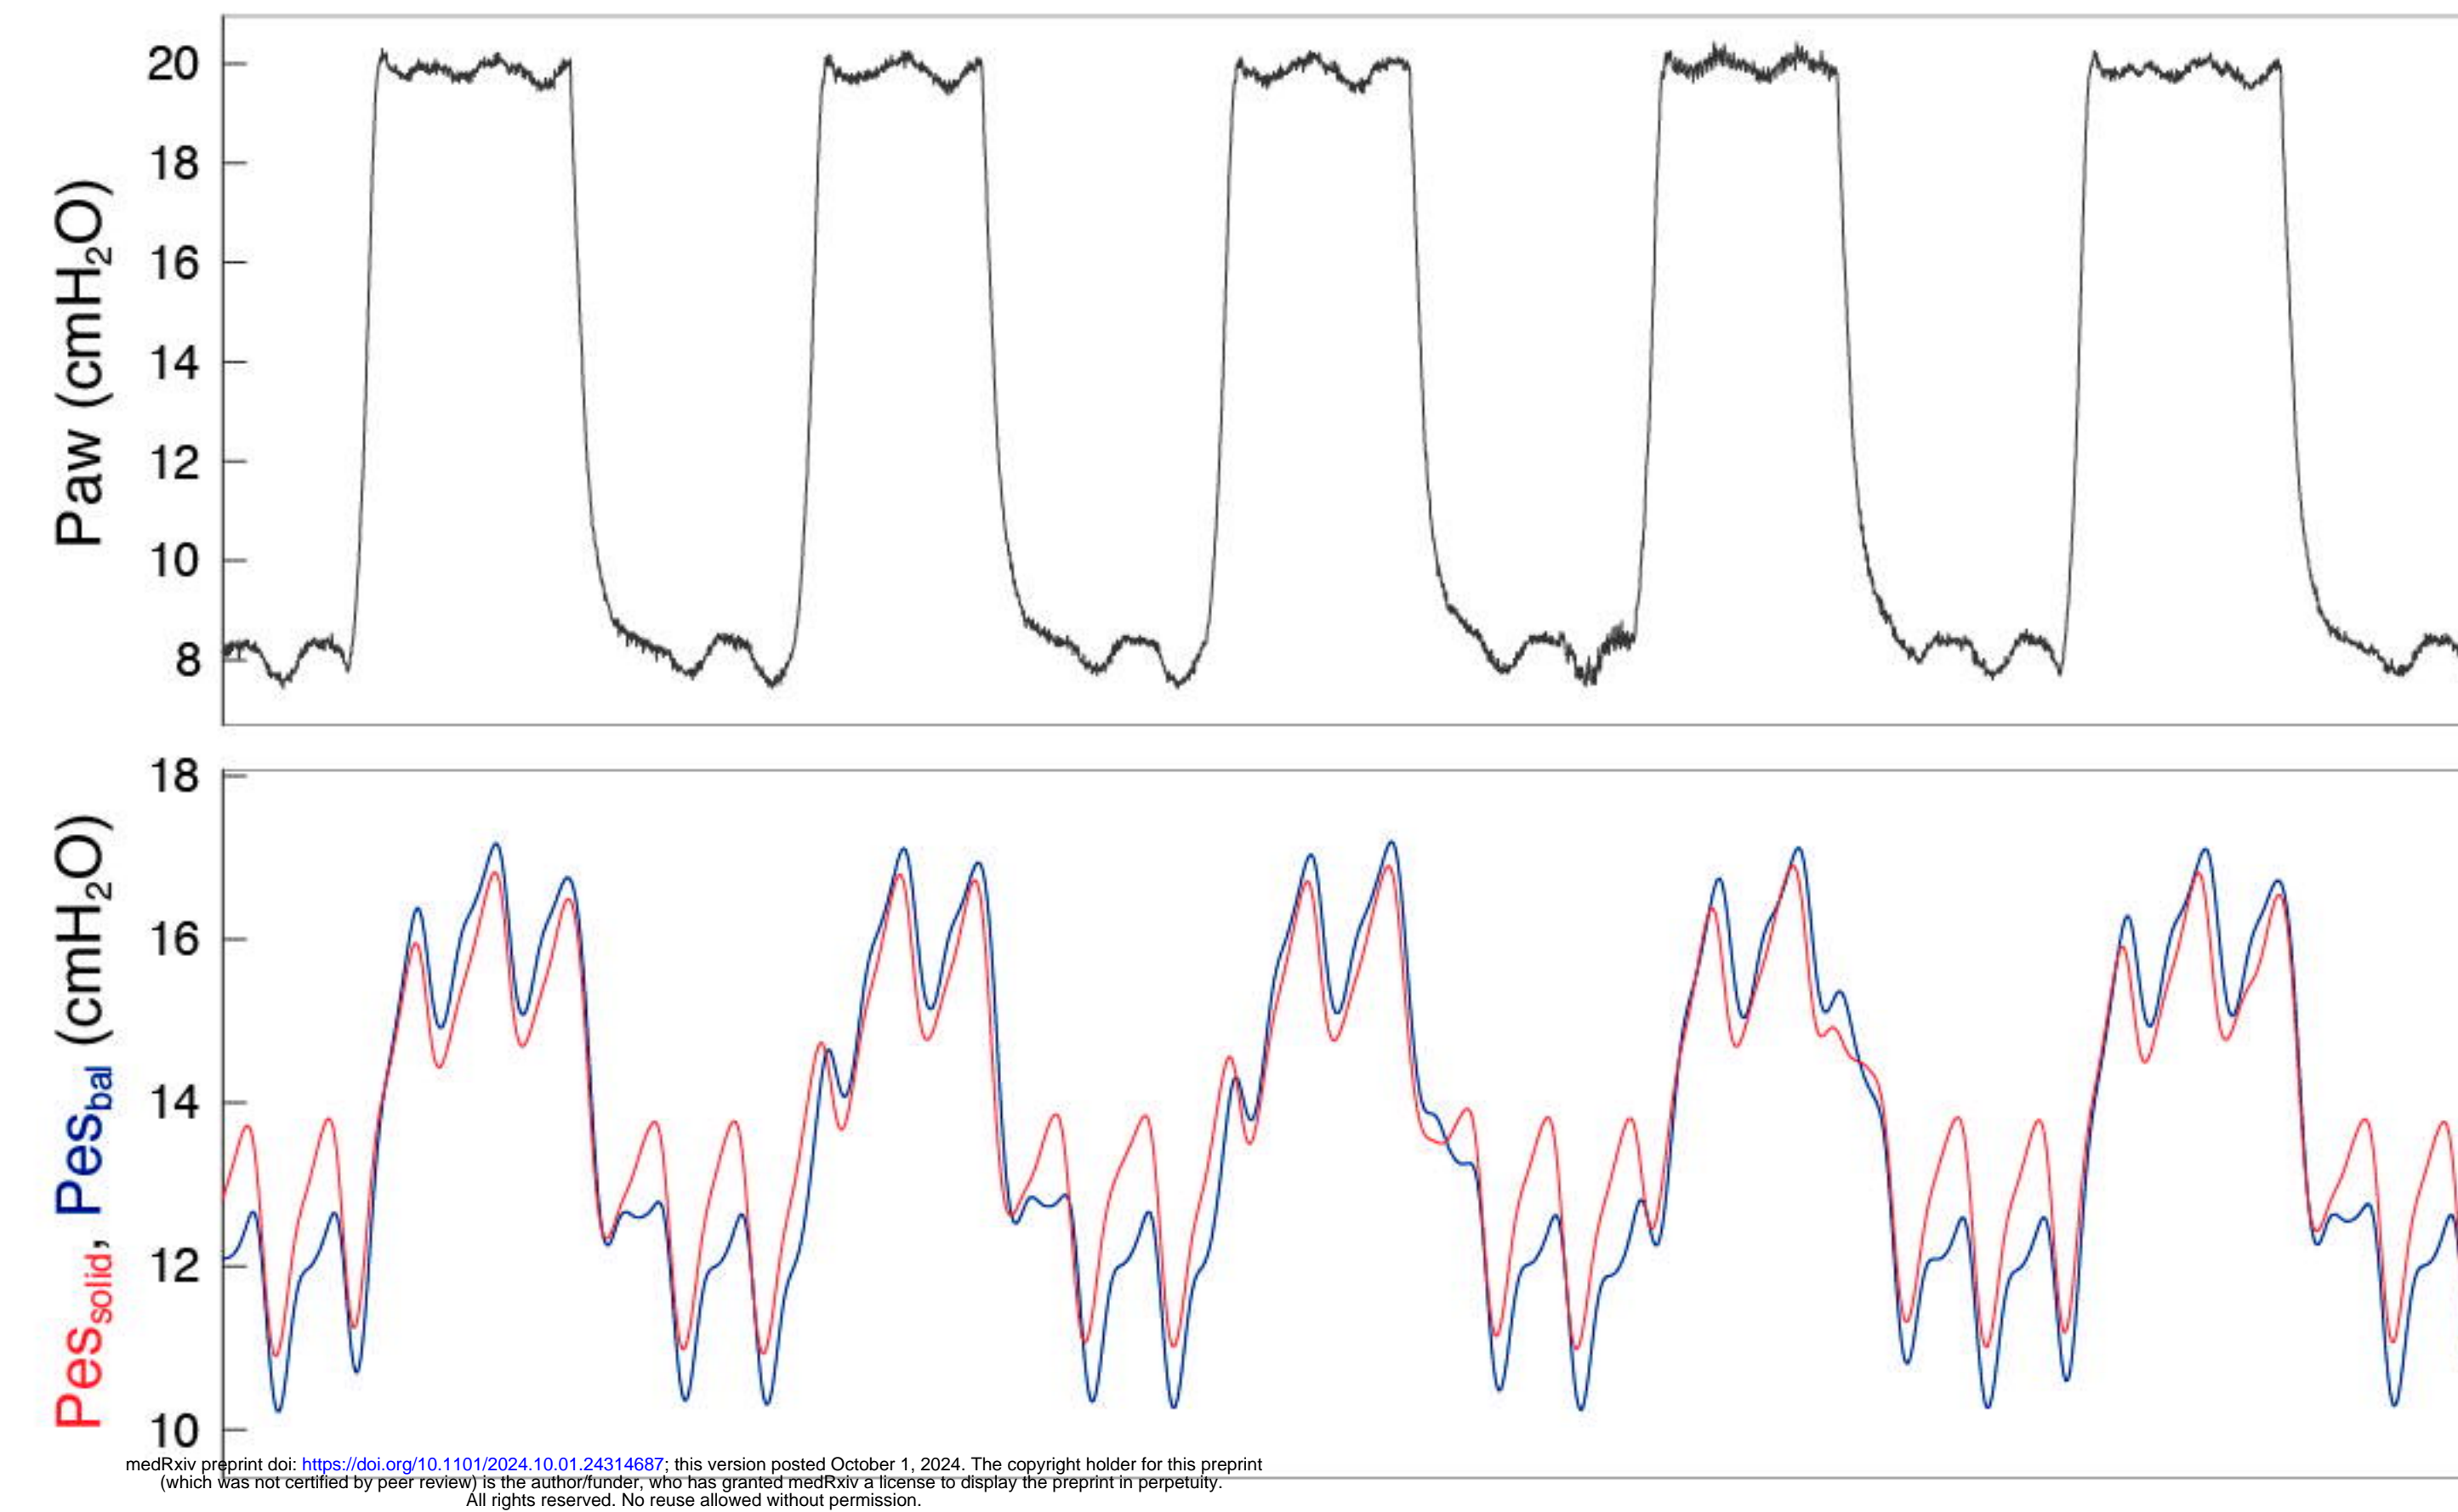

**B. Example 2: patient, controlled ventilation**

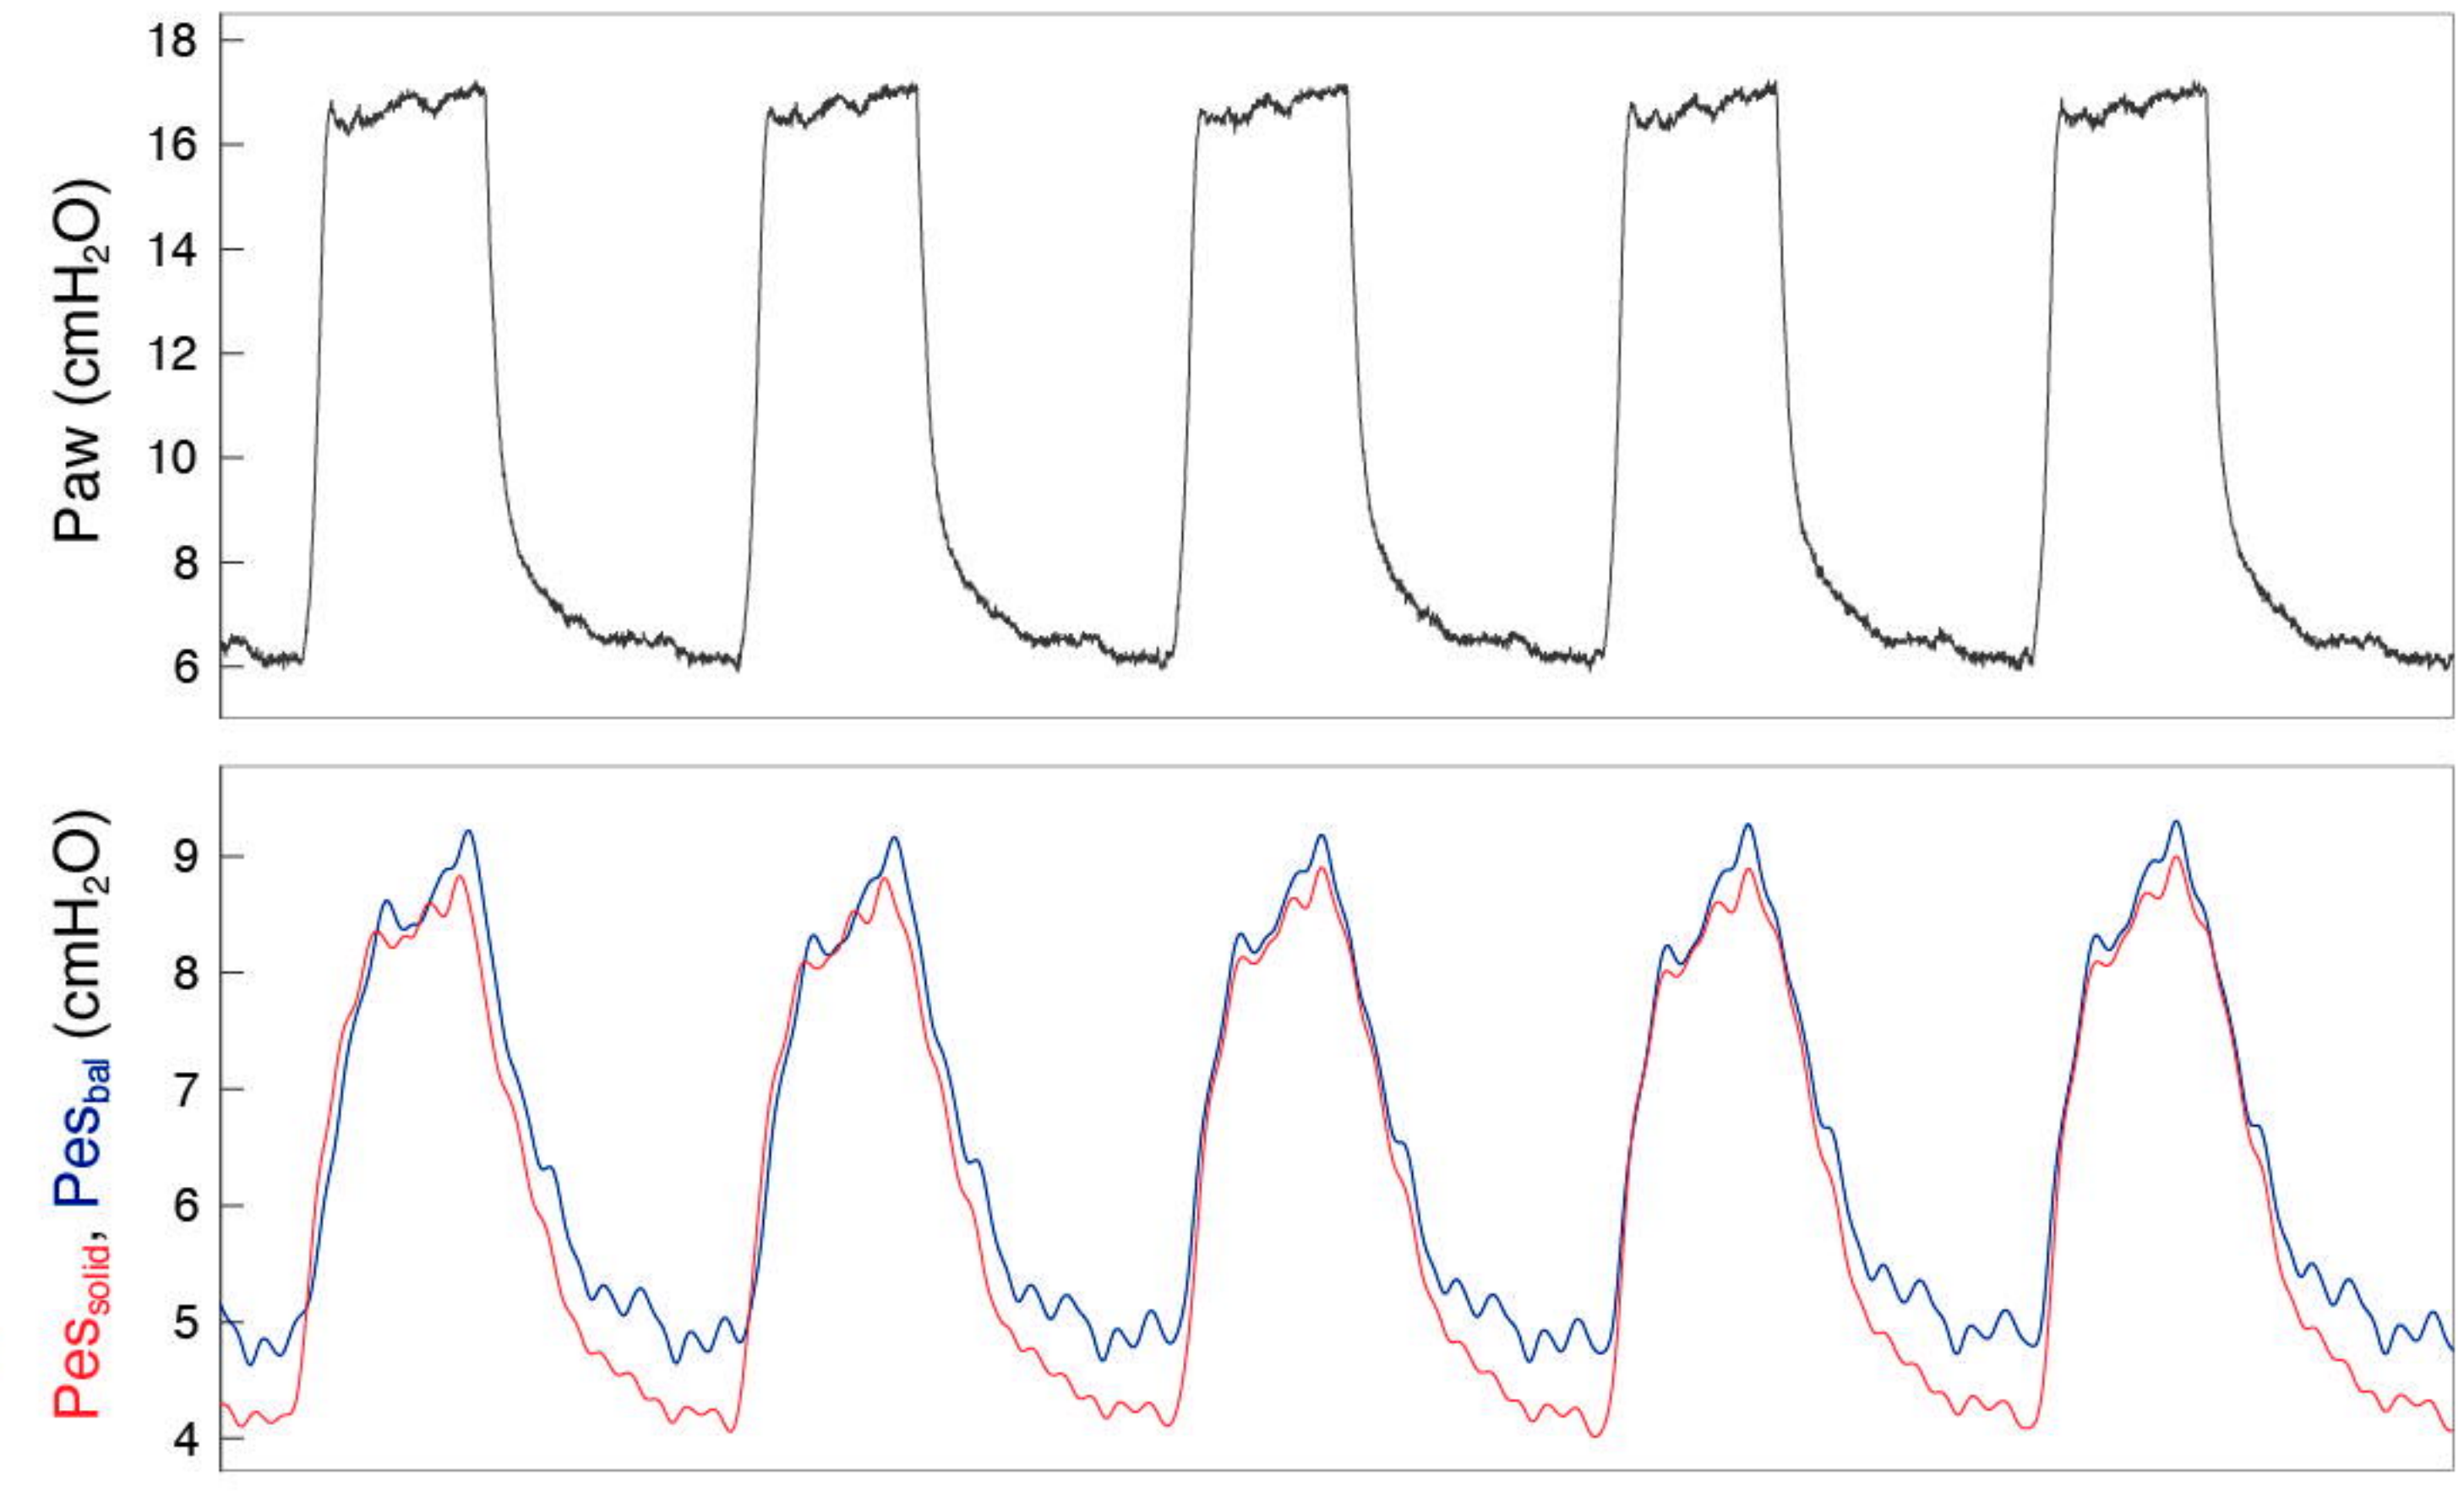

**C. Example 3: patient, assisted ventilation**

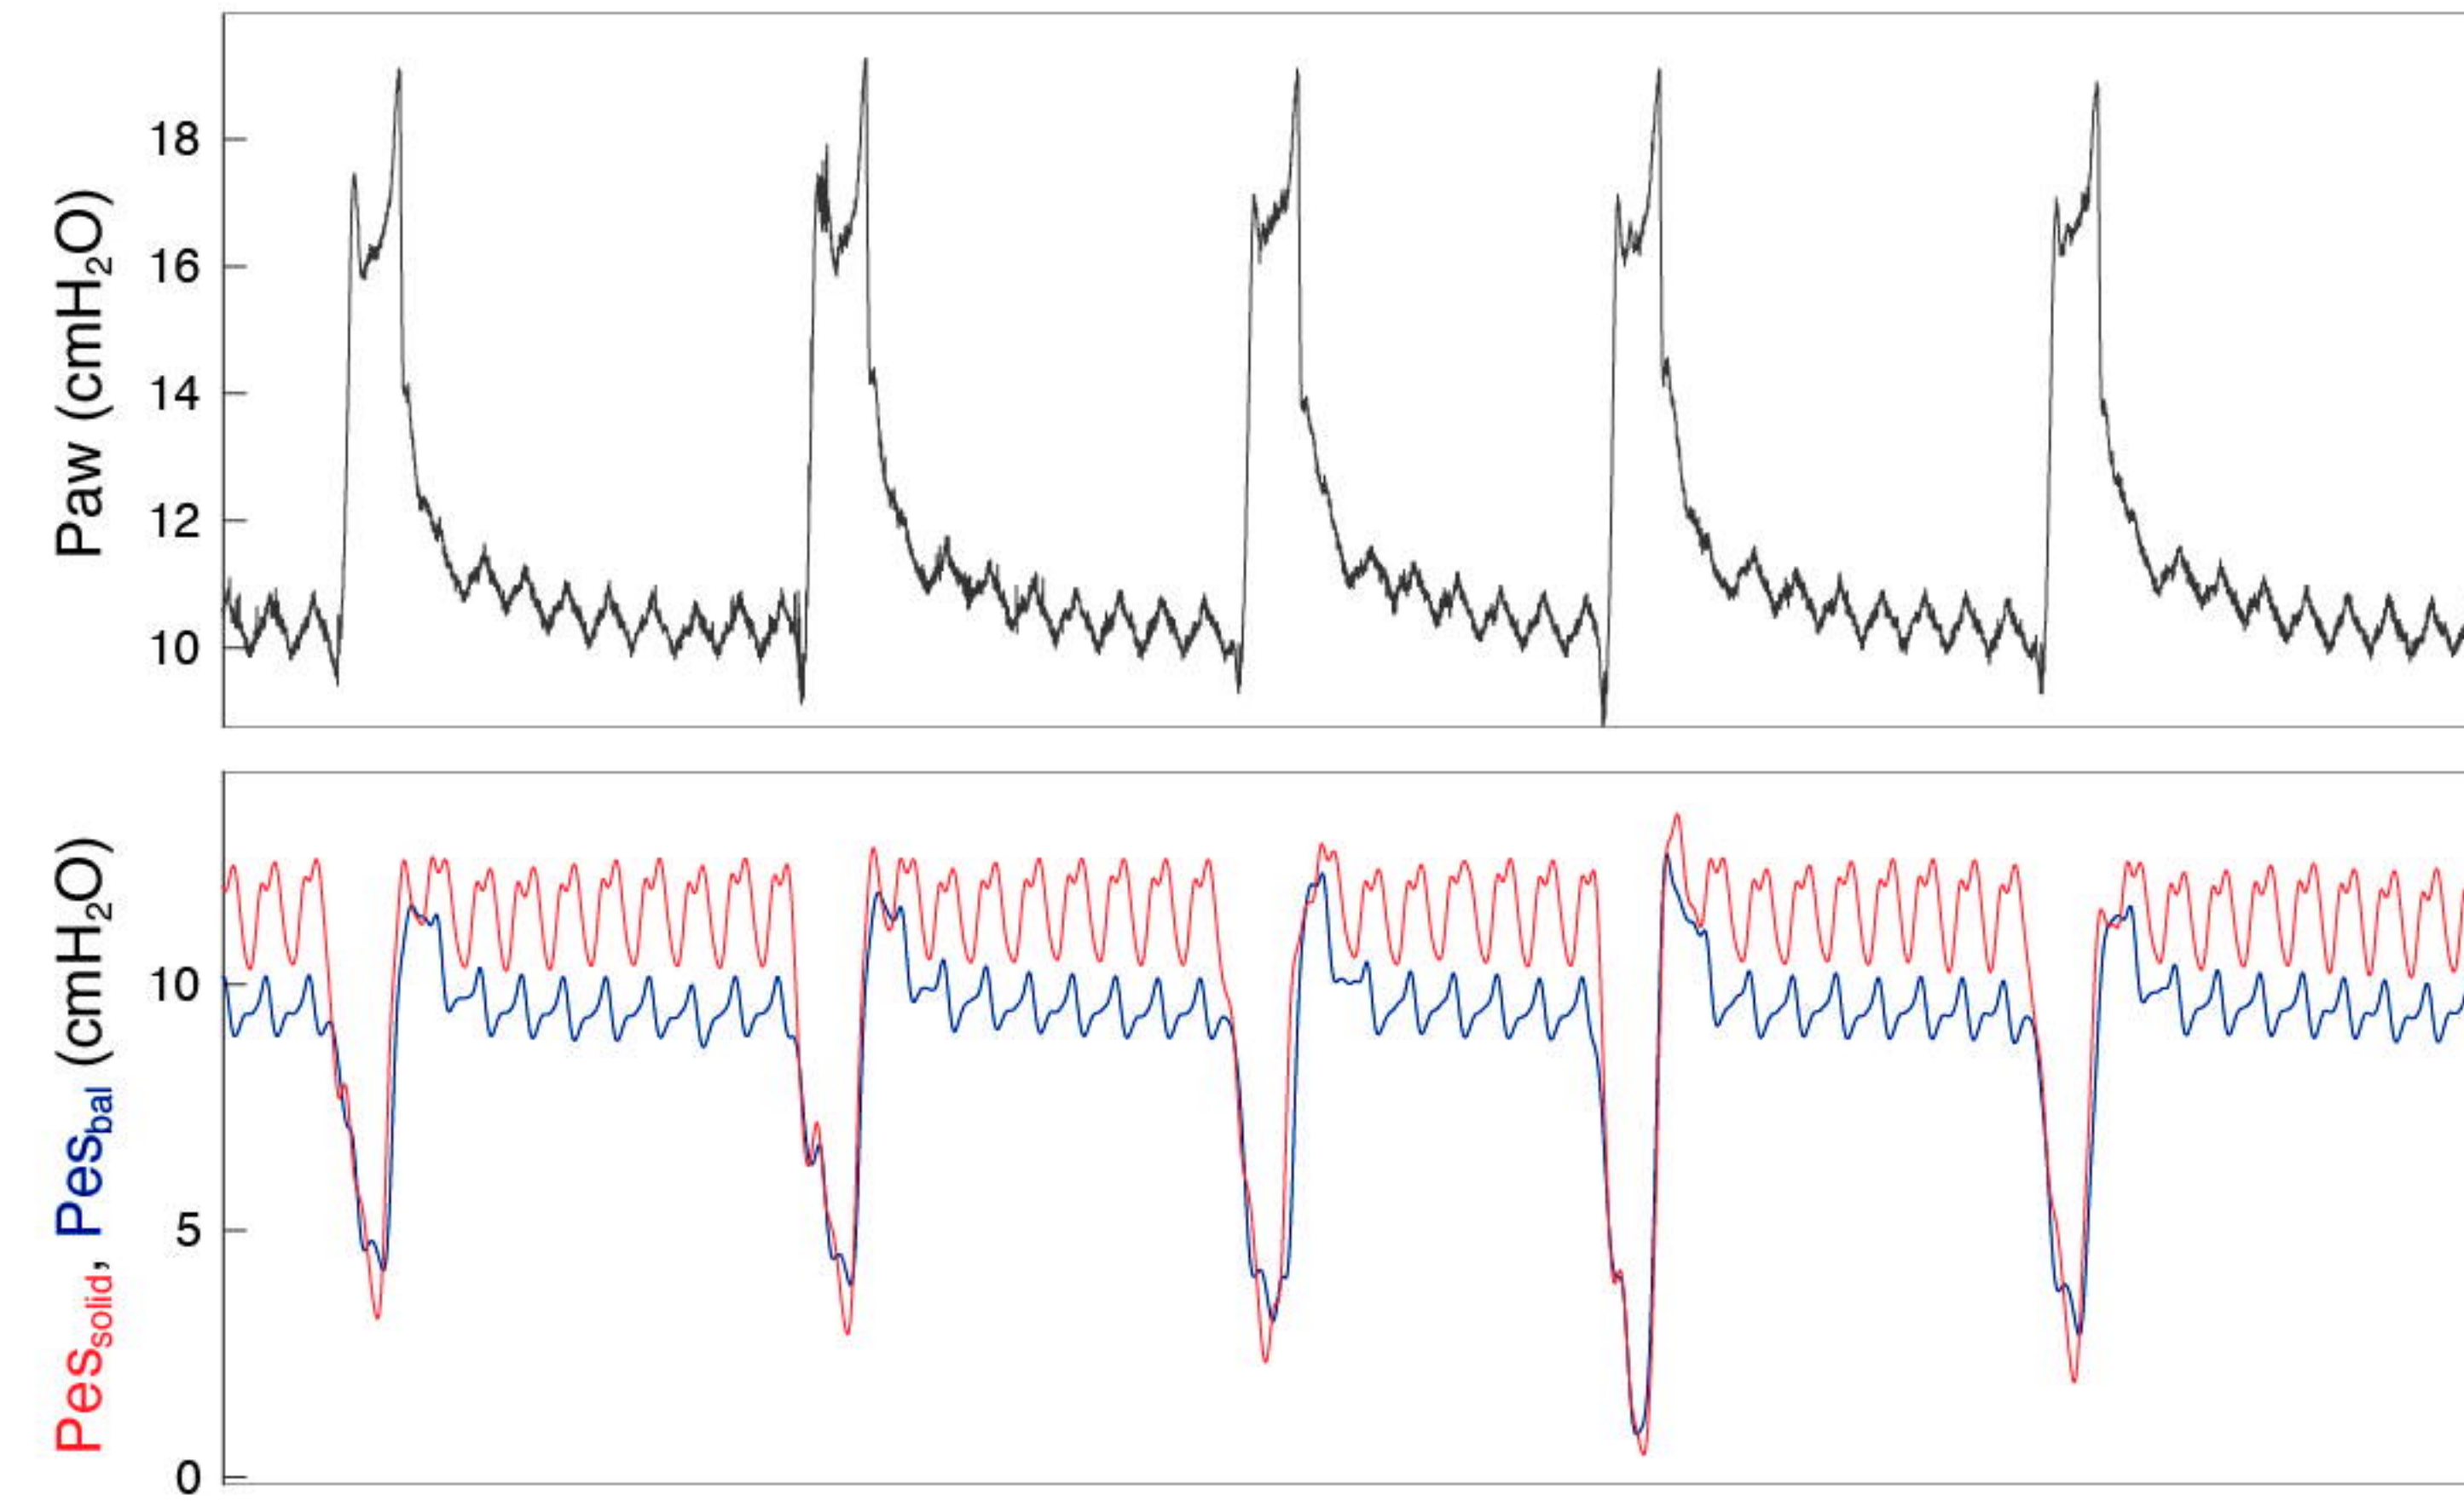

**D. Example 4: patient, assisted ventilation**

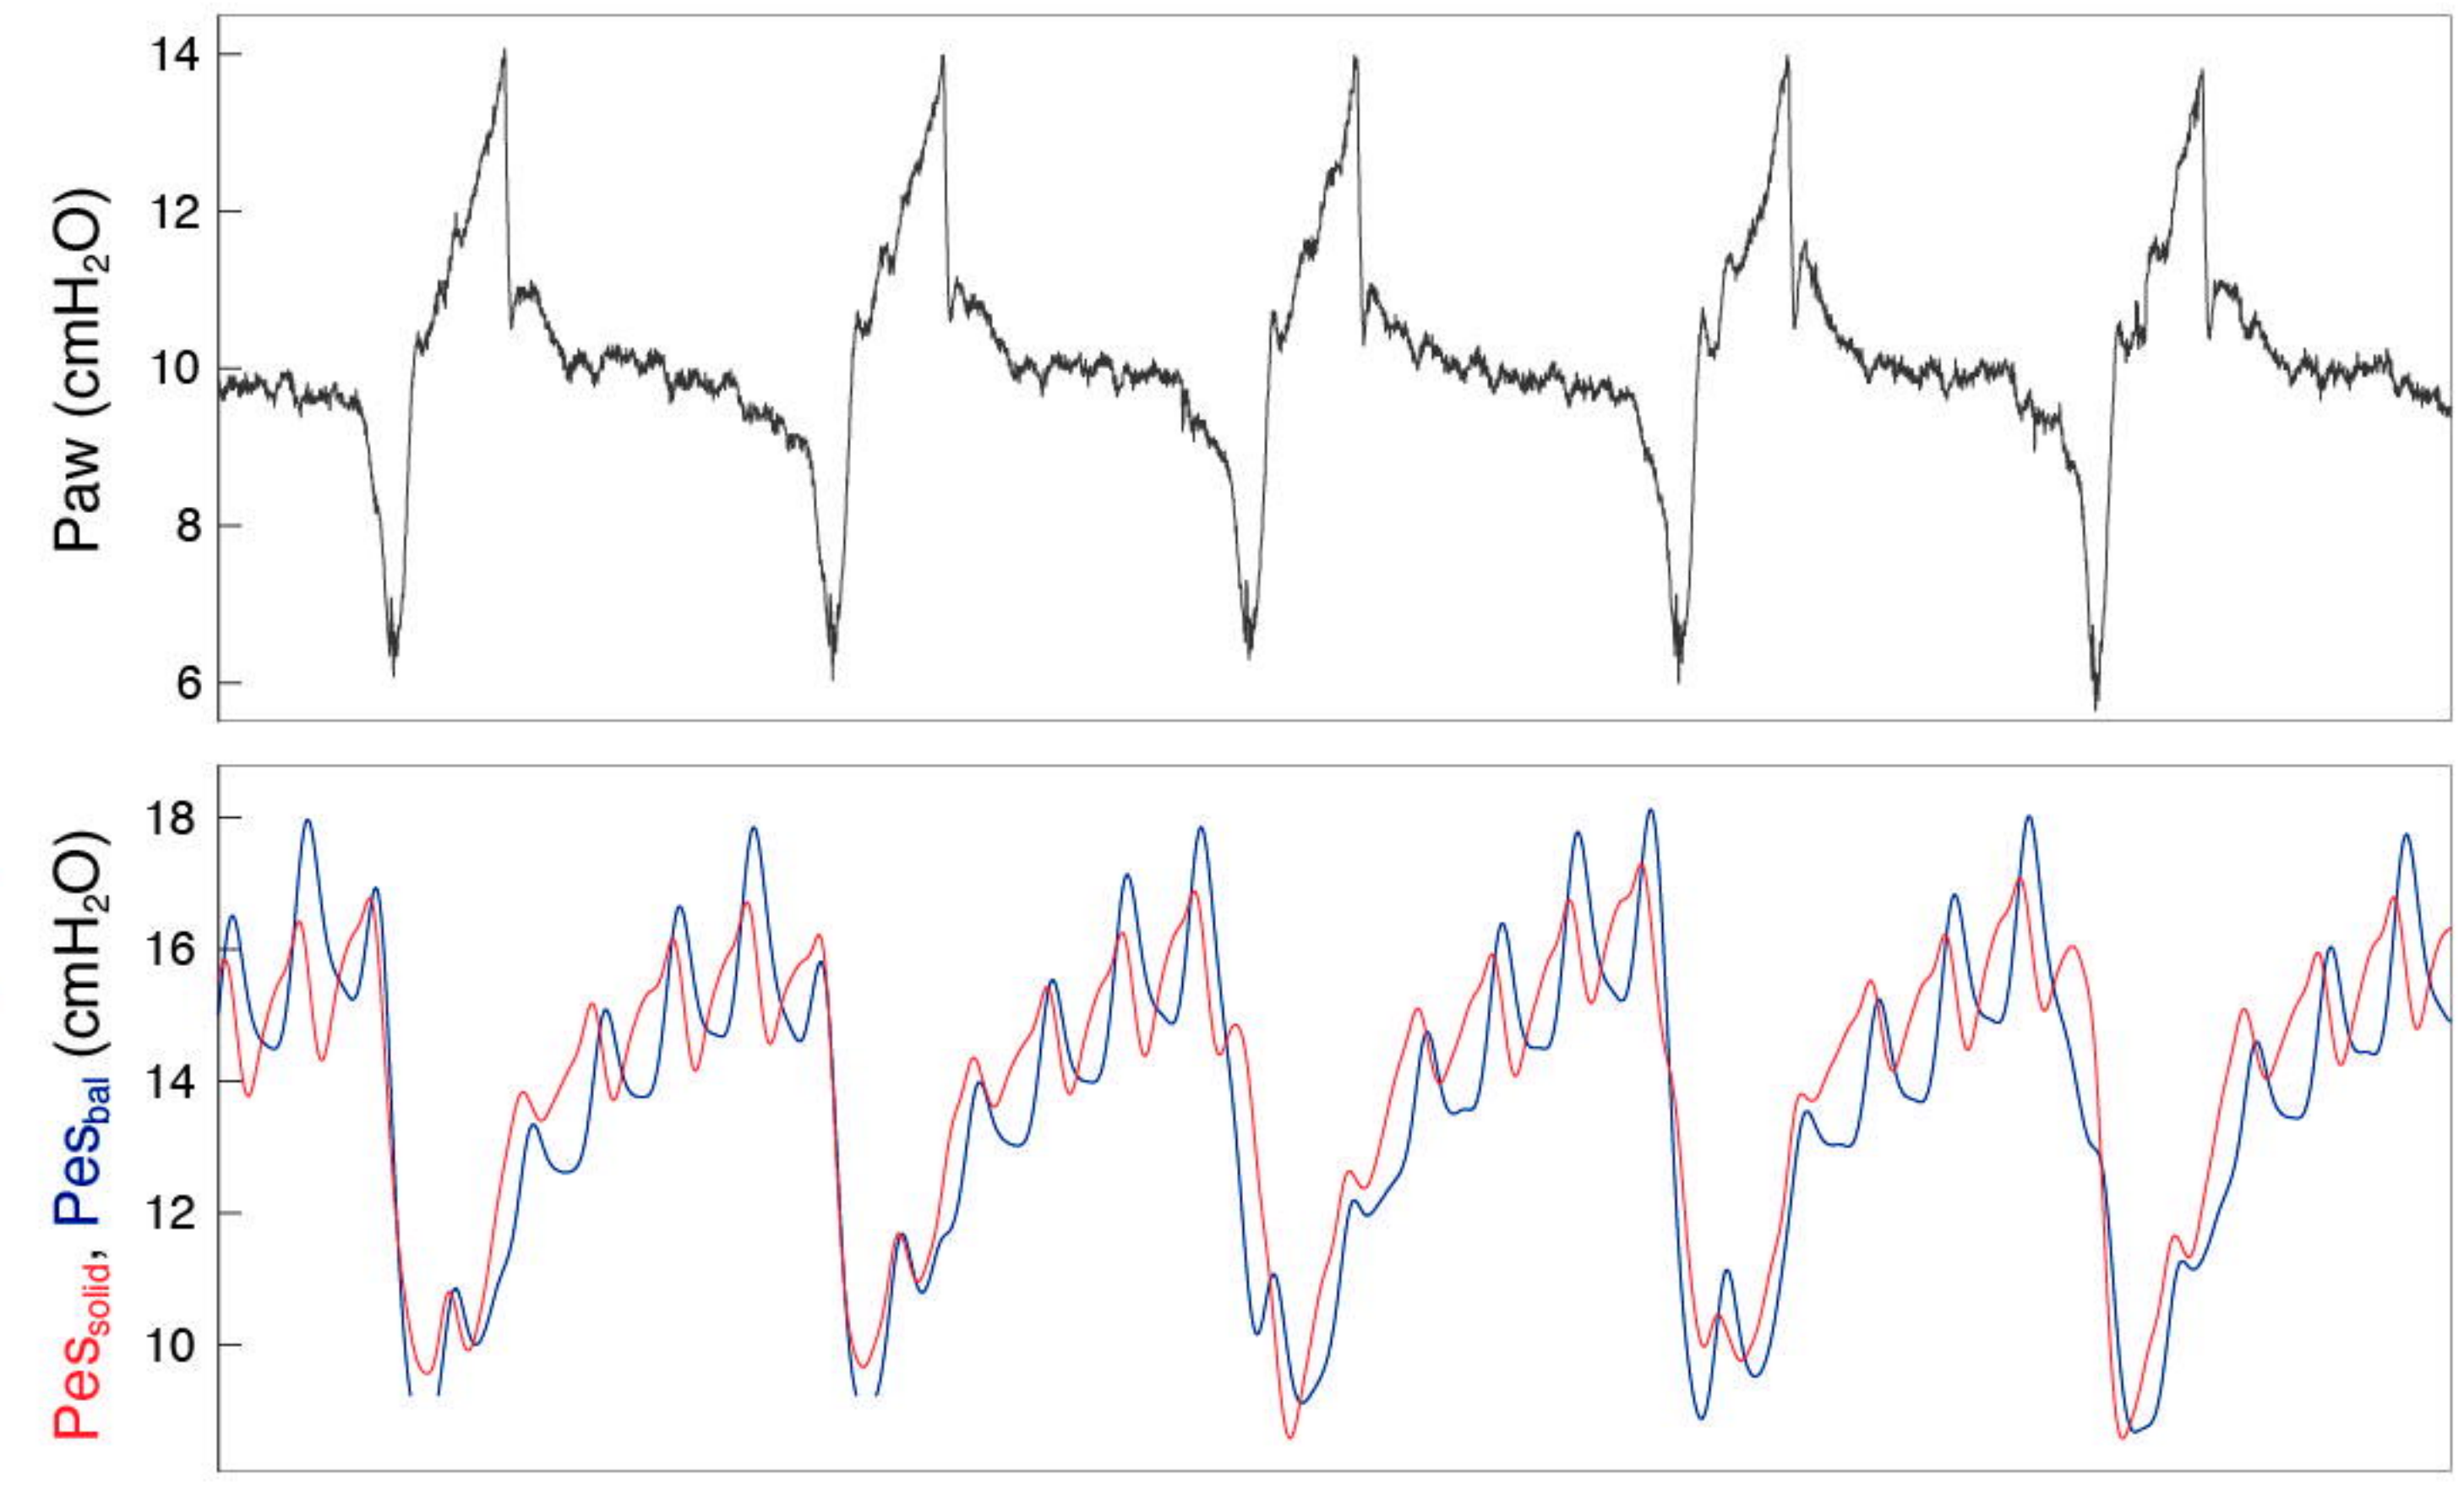

### A. Controlled: end-expiratory Pes

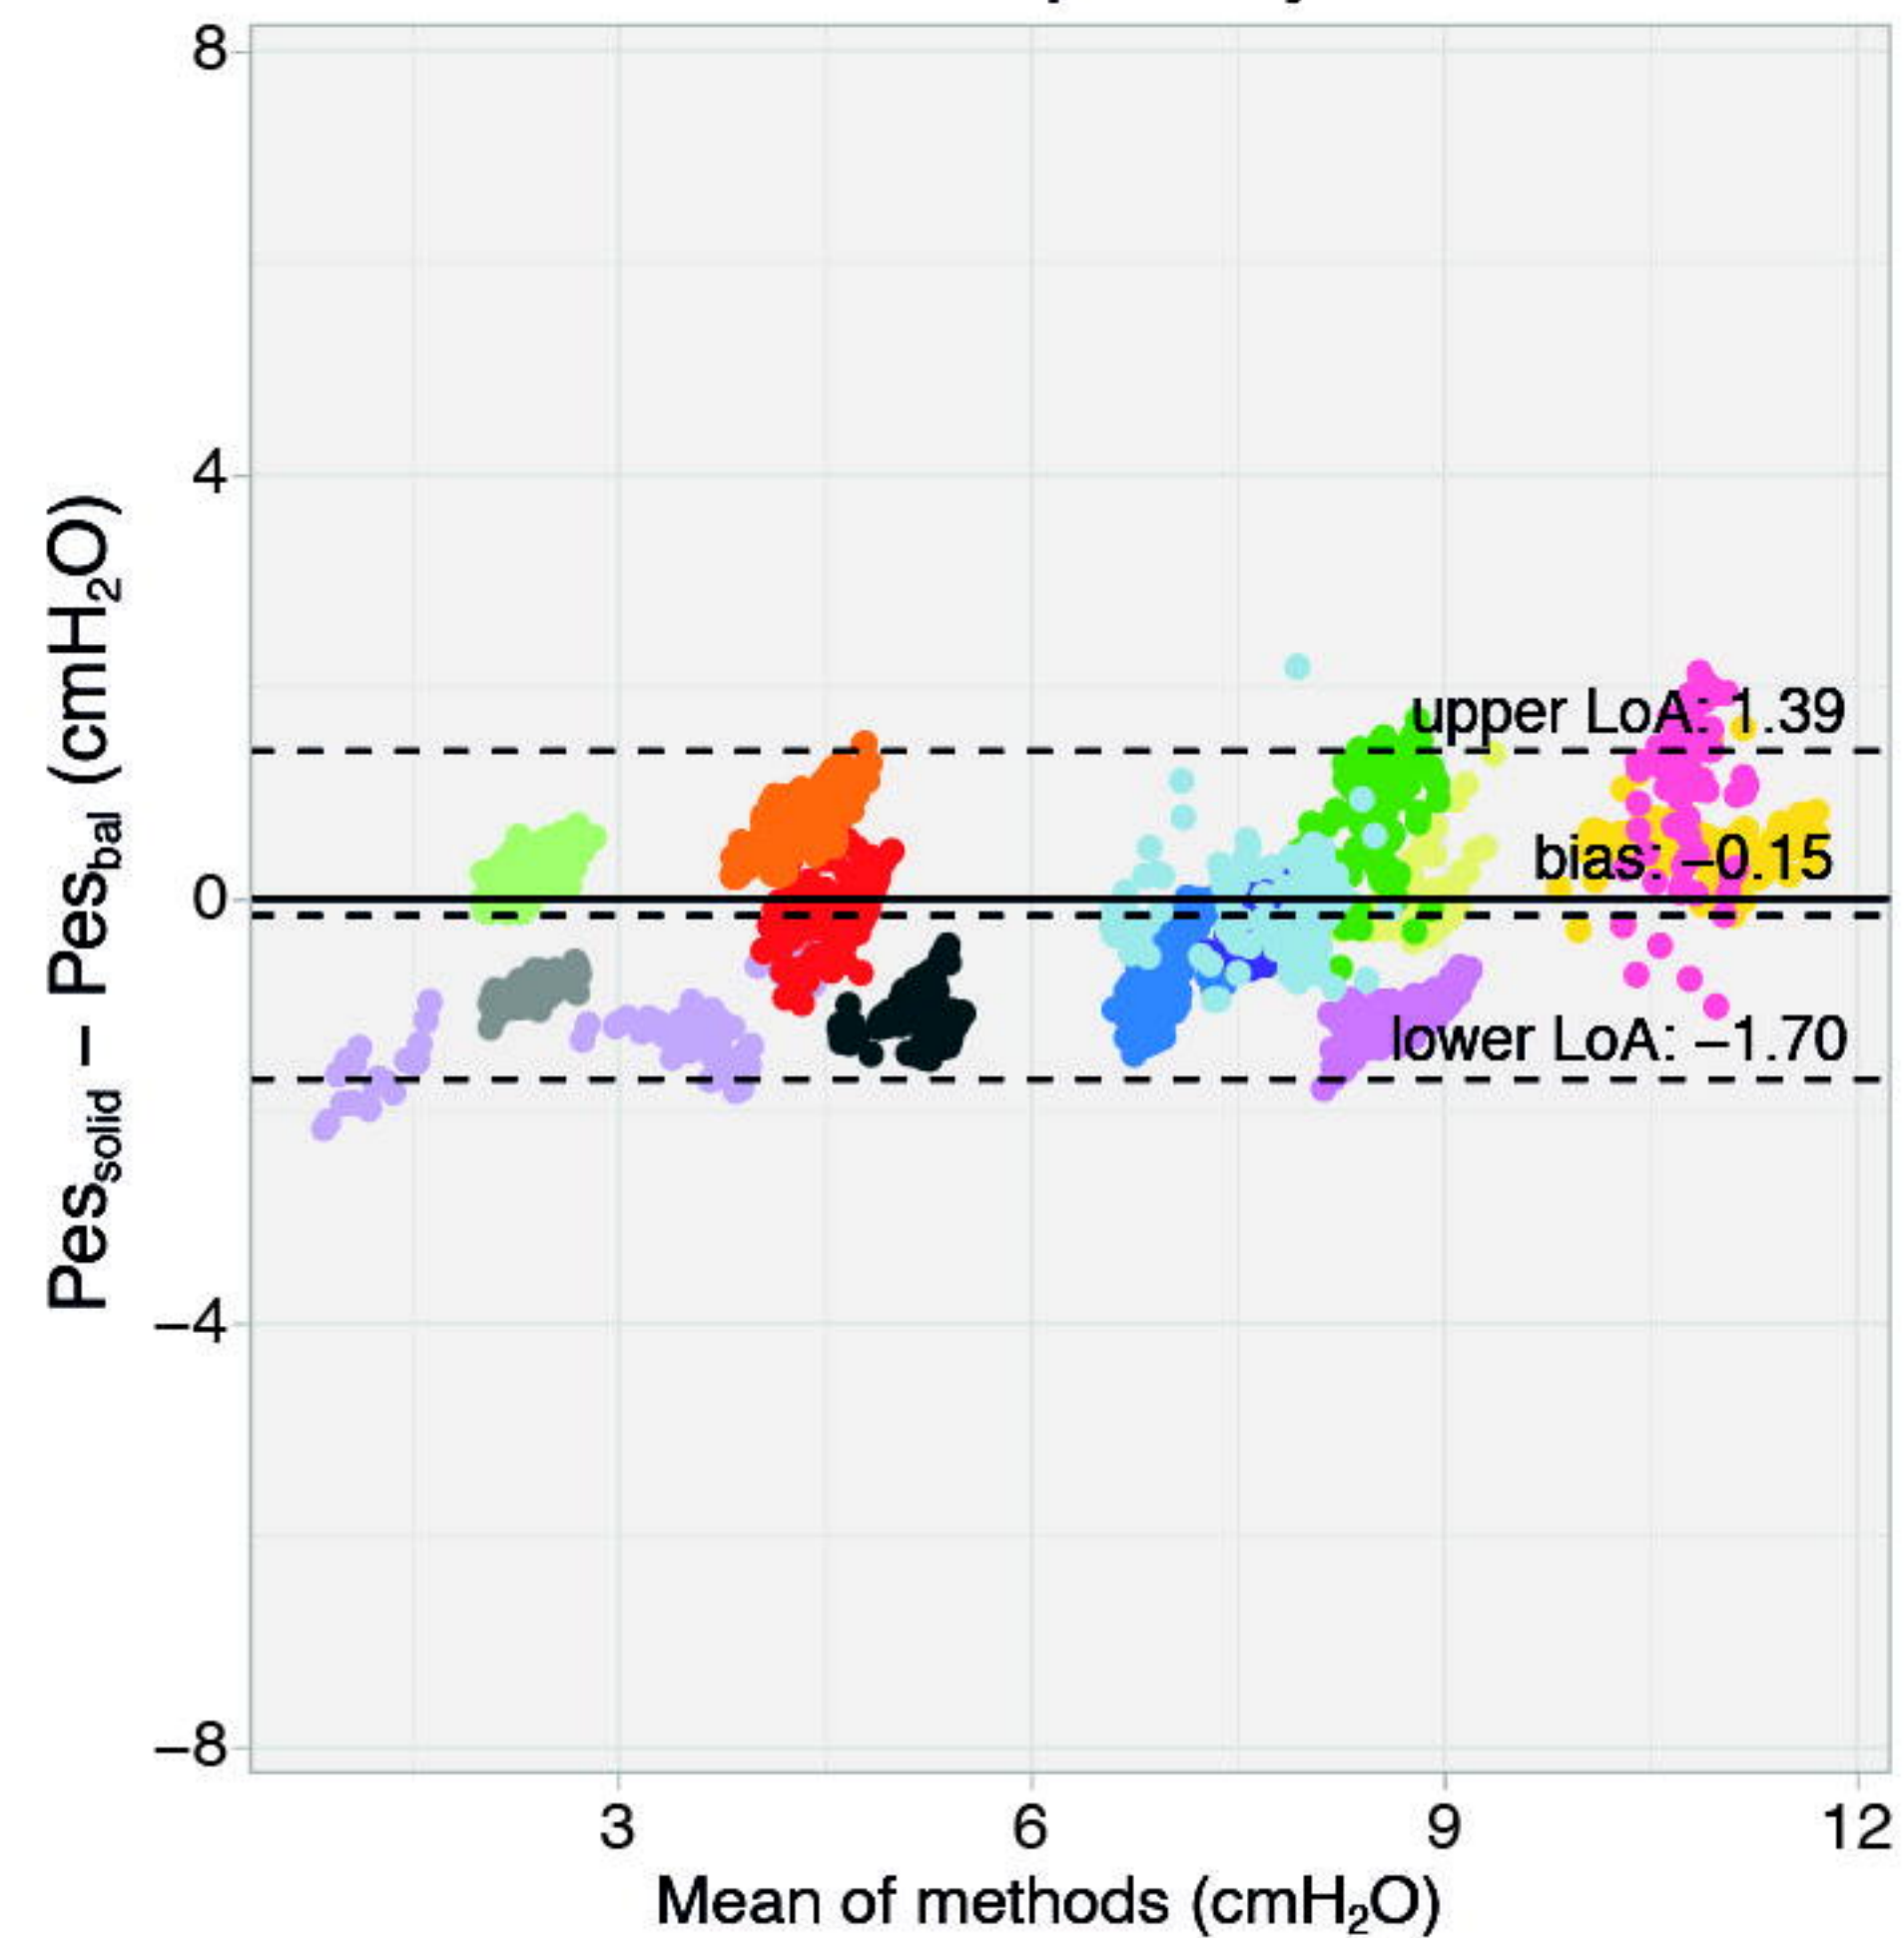

### B. Controlled: end-inspiratory Pes

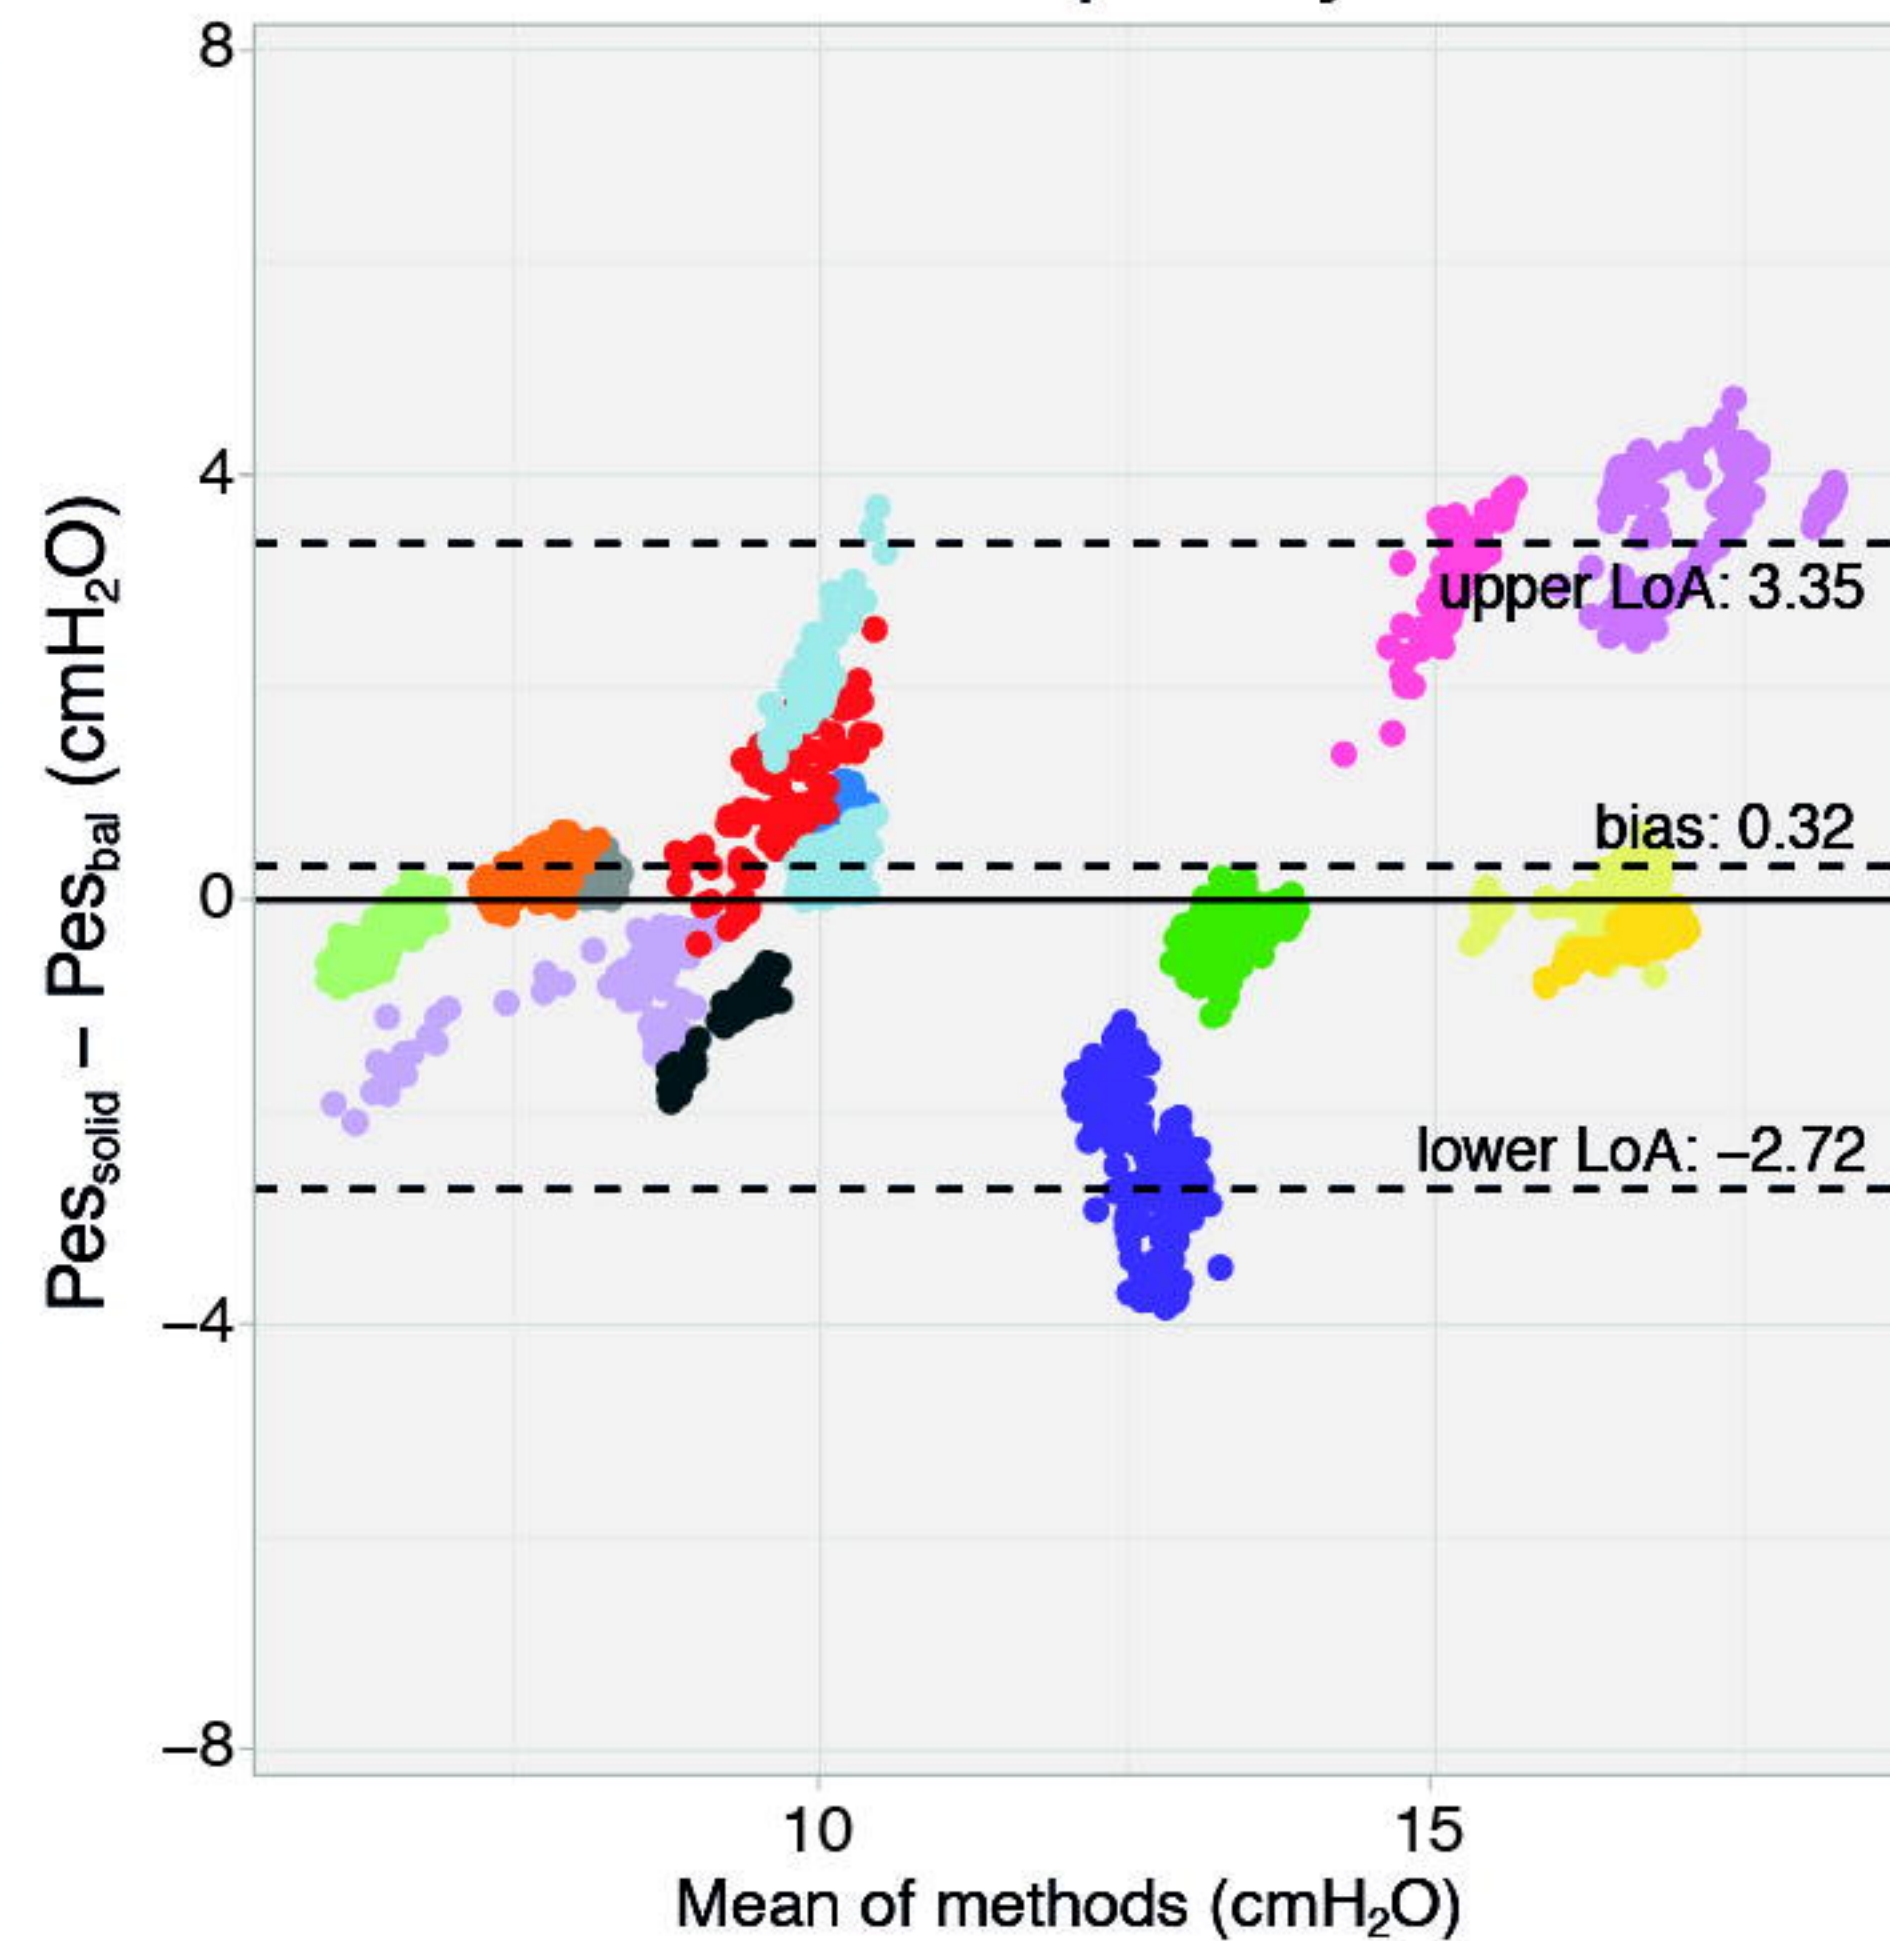

### C. Controlled: ΔPes

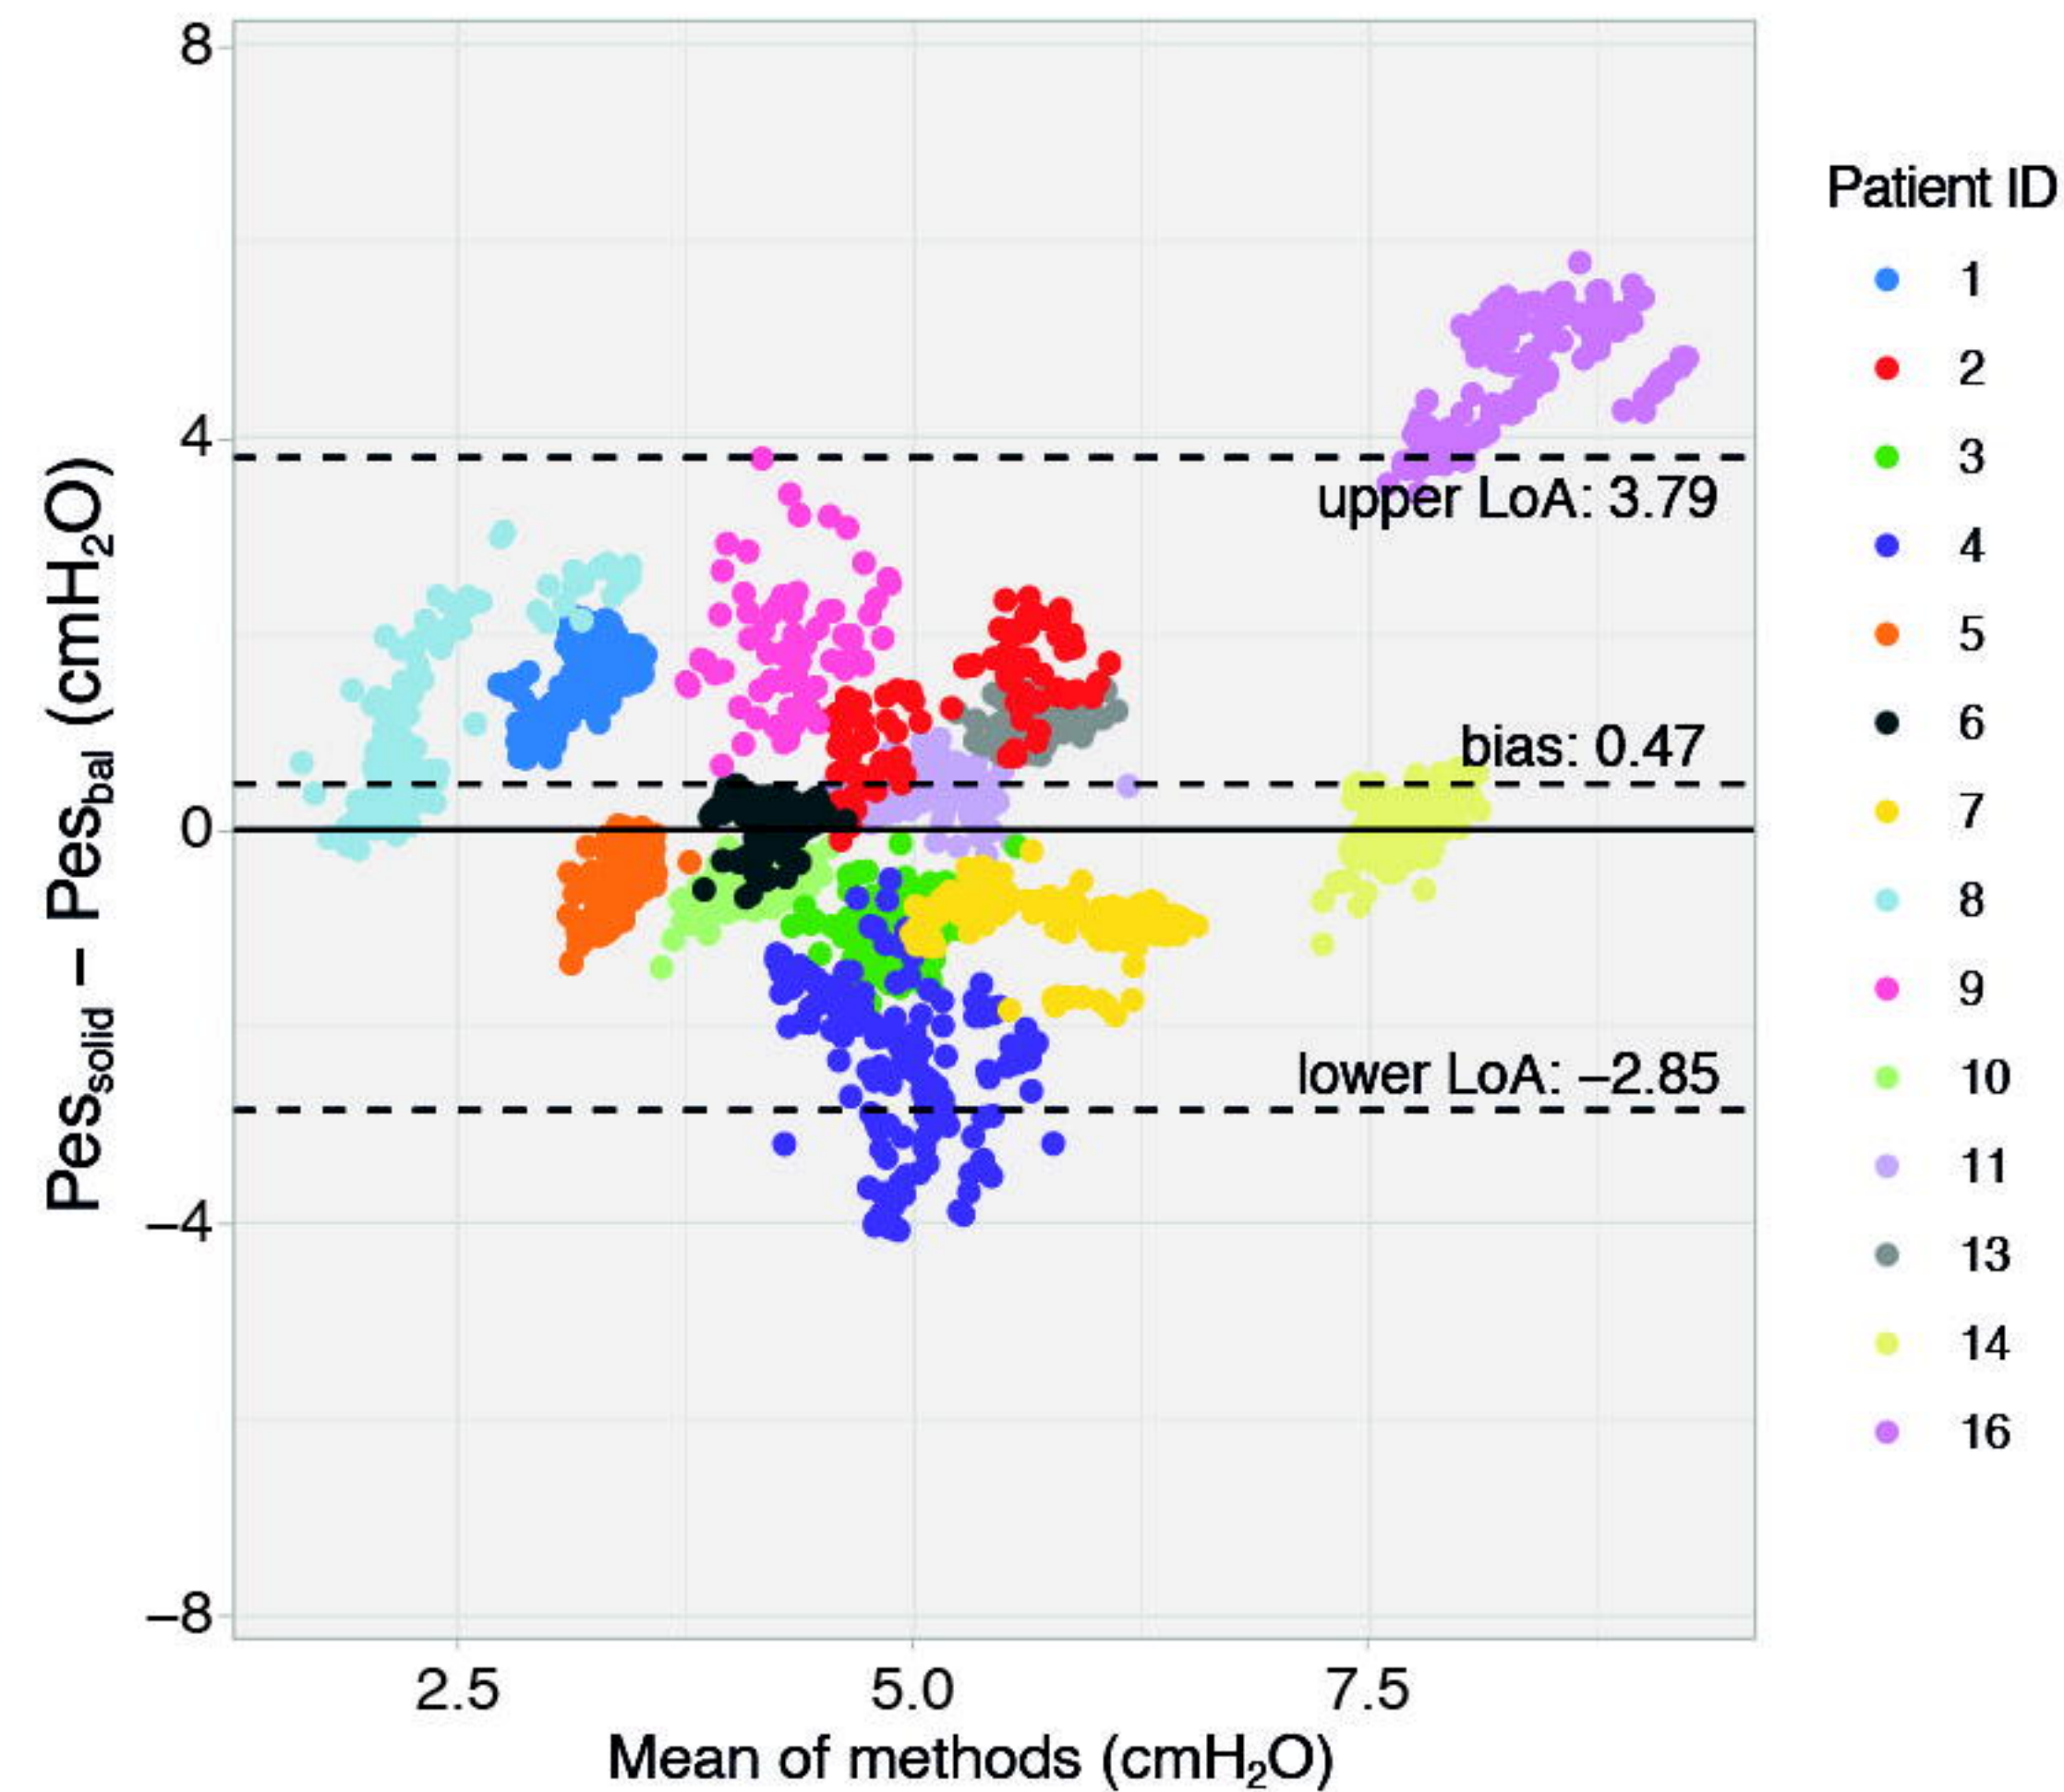

### A. Assisted: end-expiratory Pes

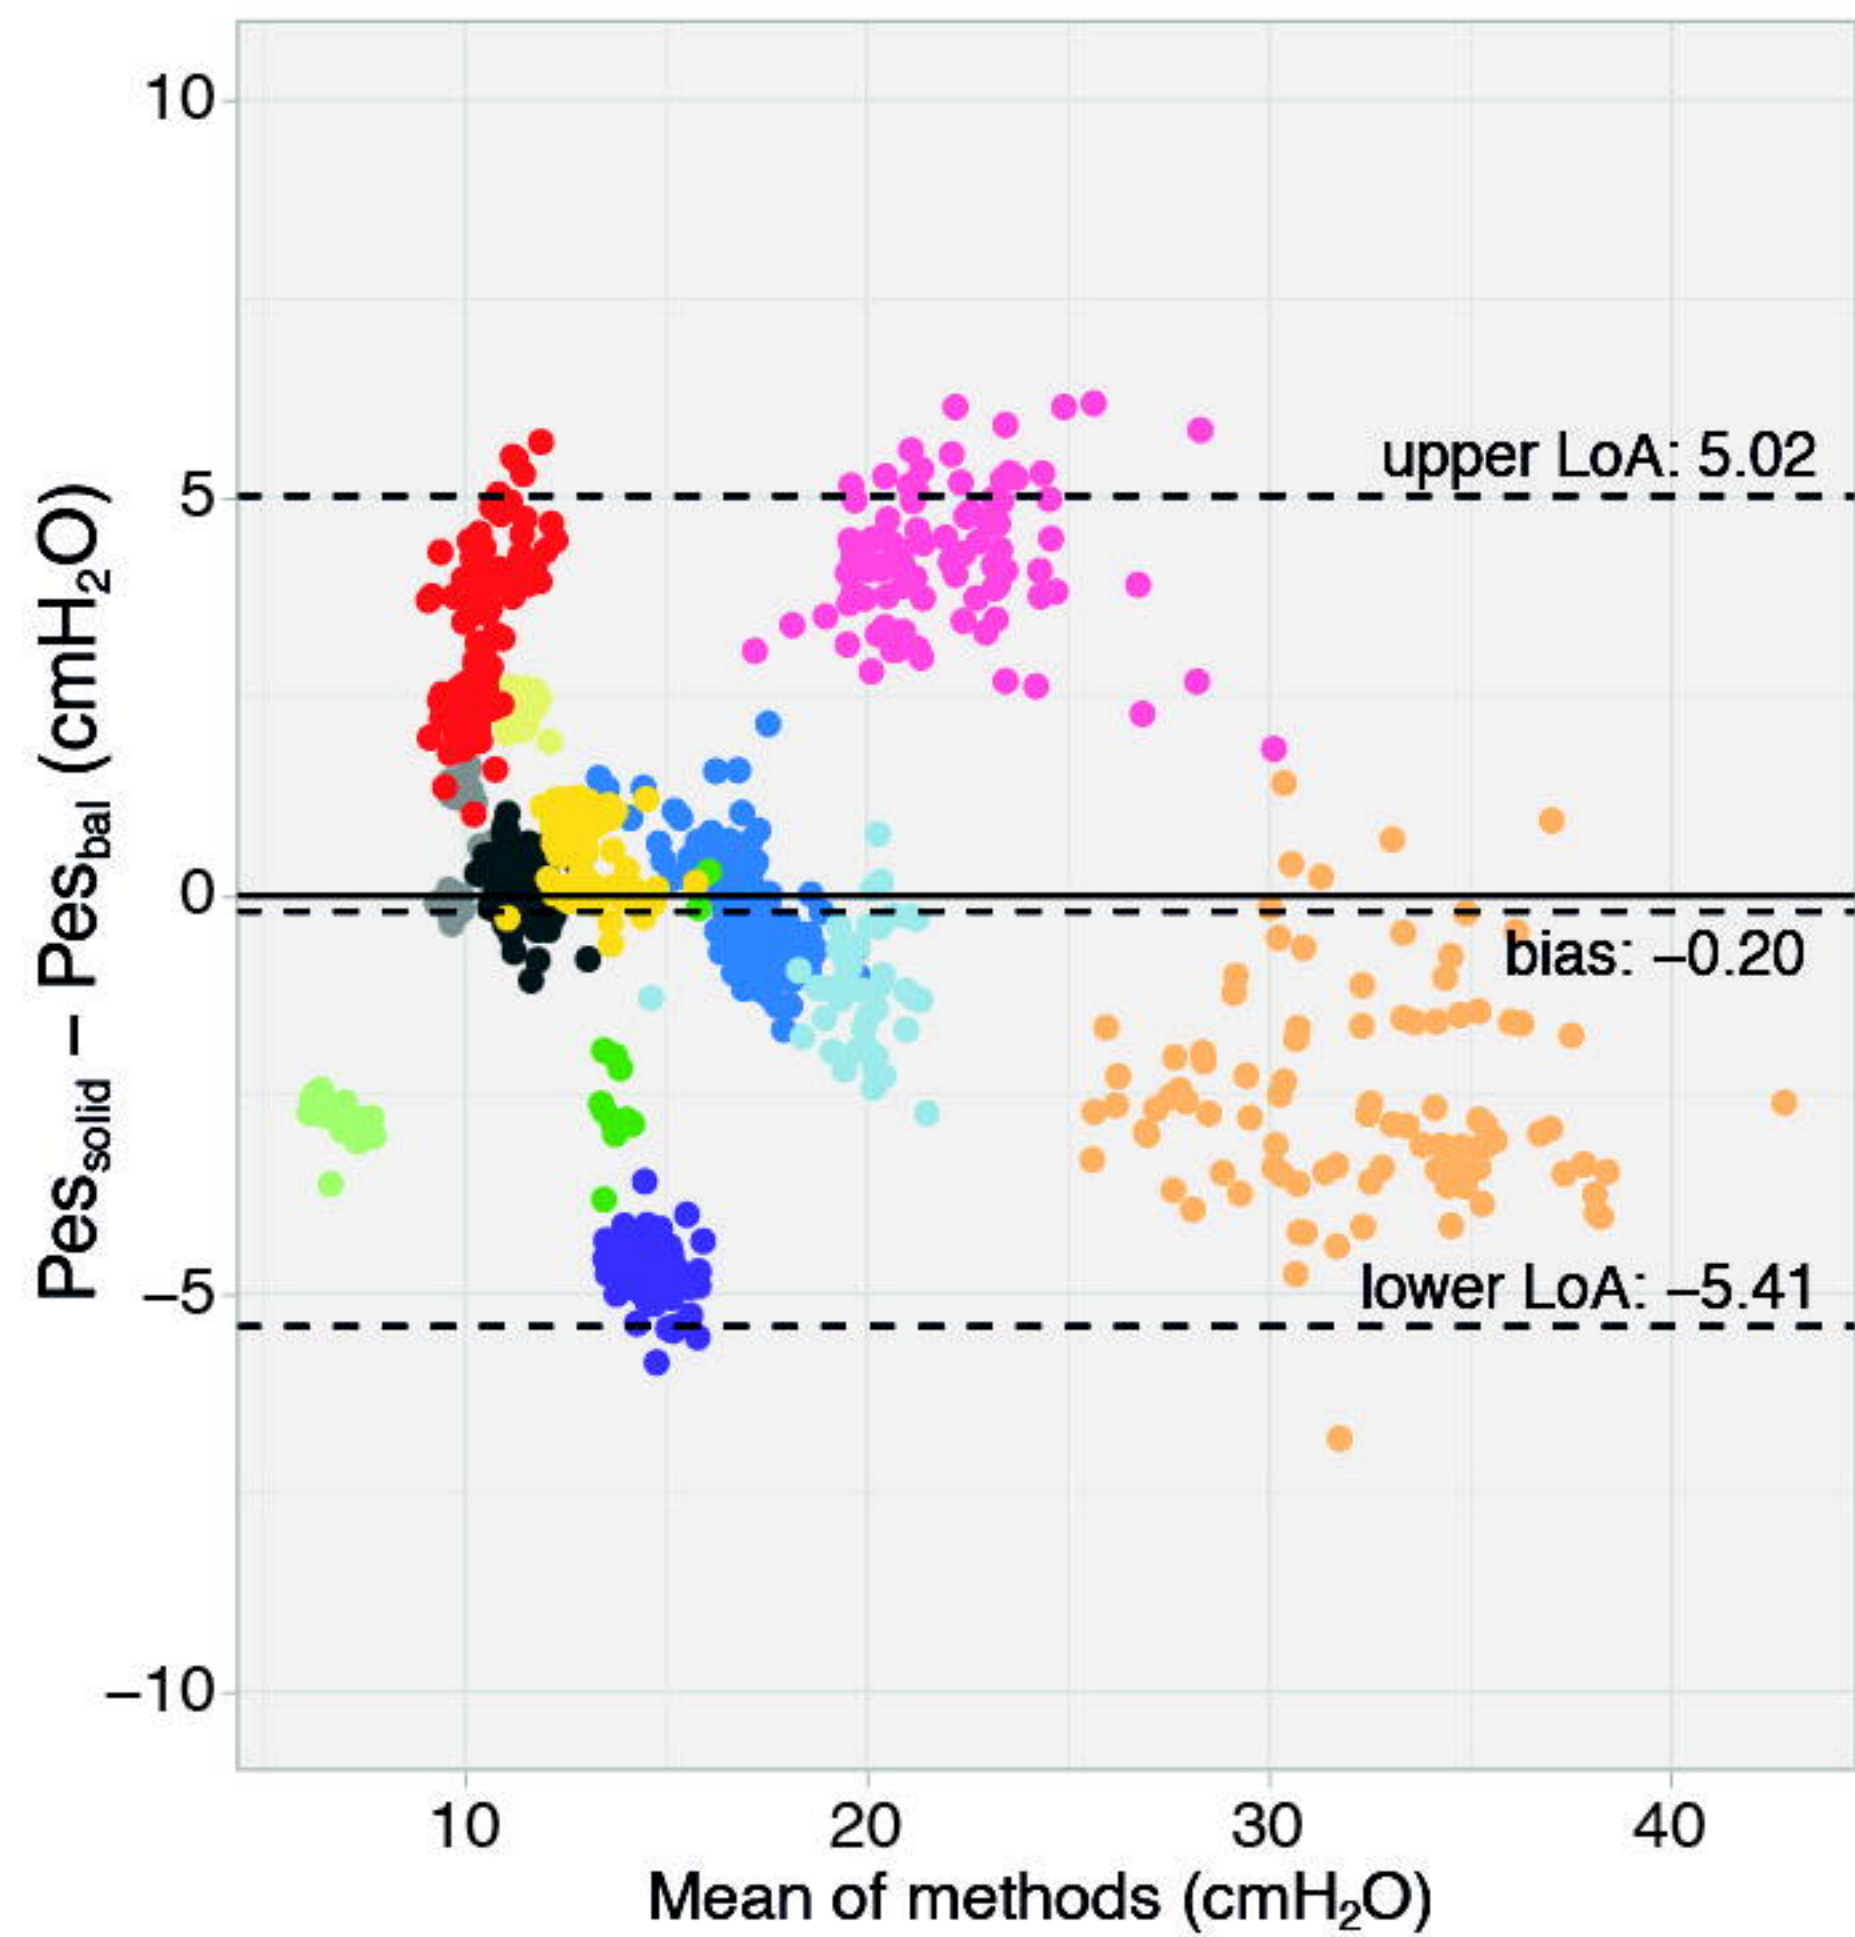

### B. Assisted: end-inspiratory Pes

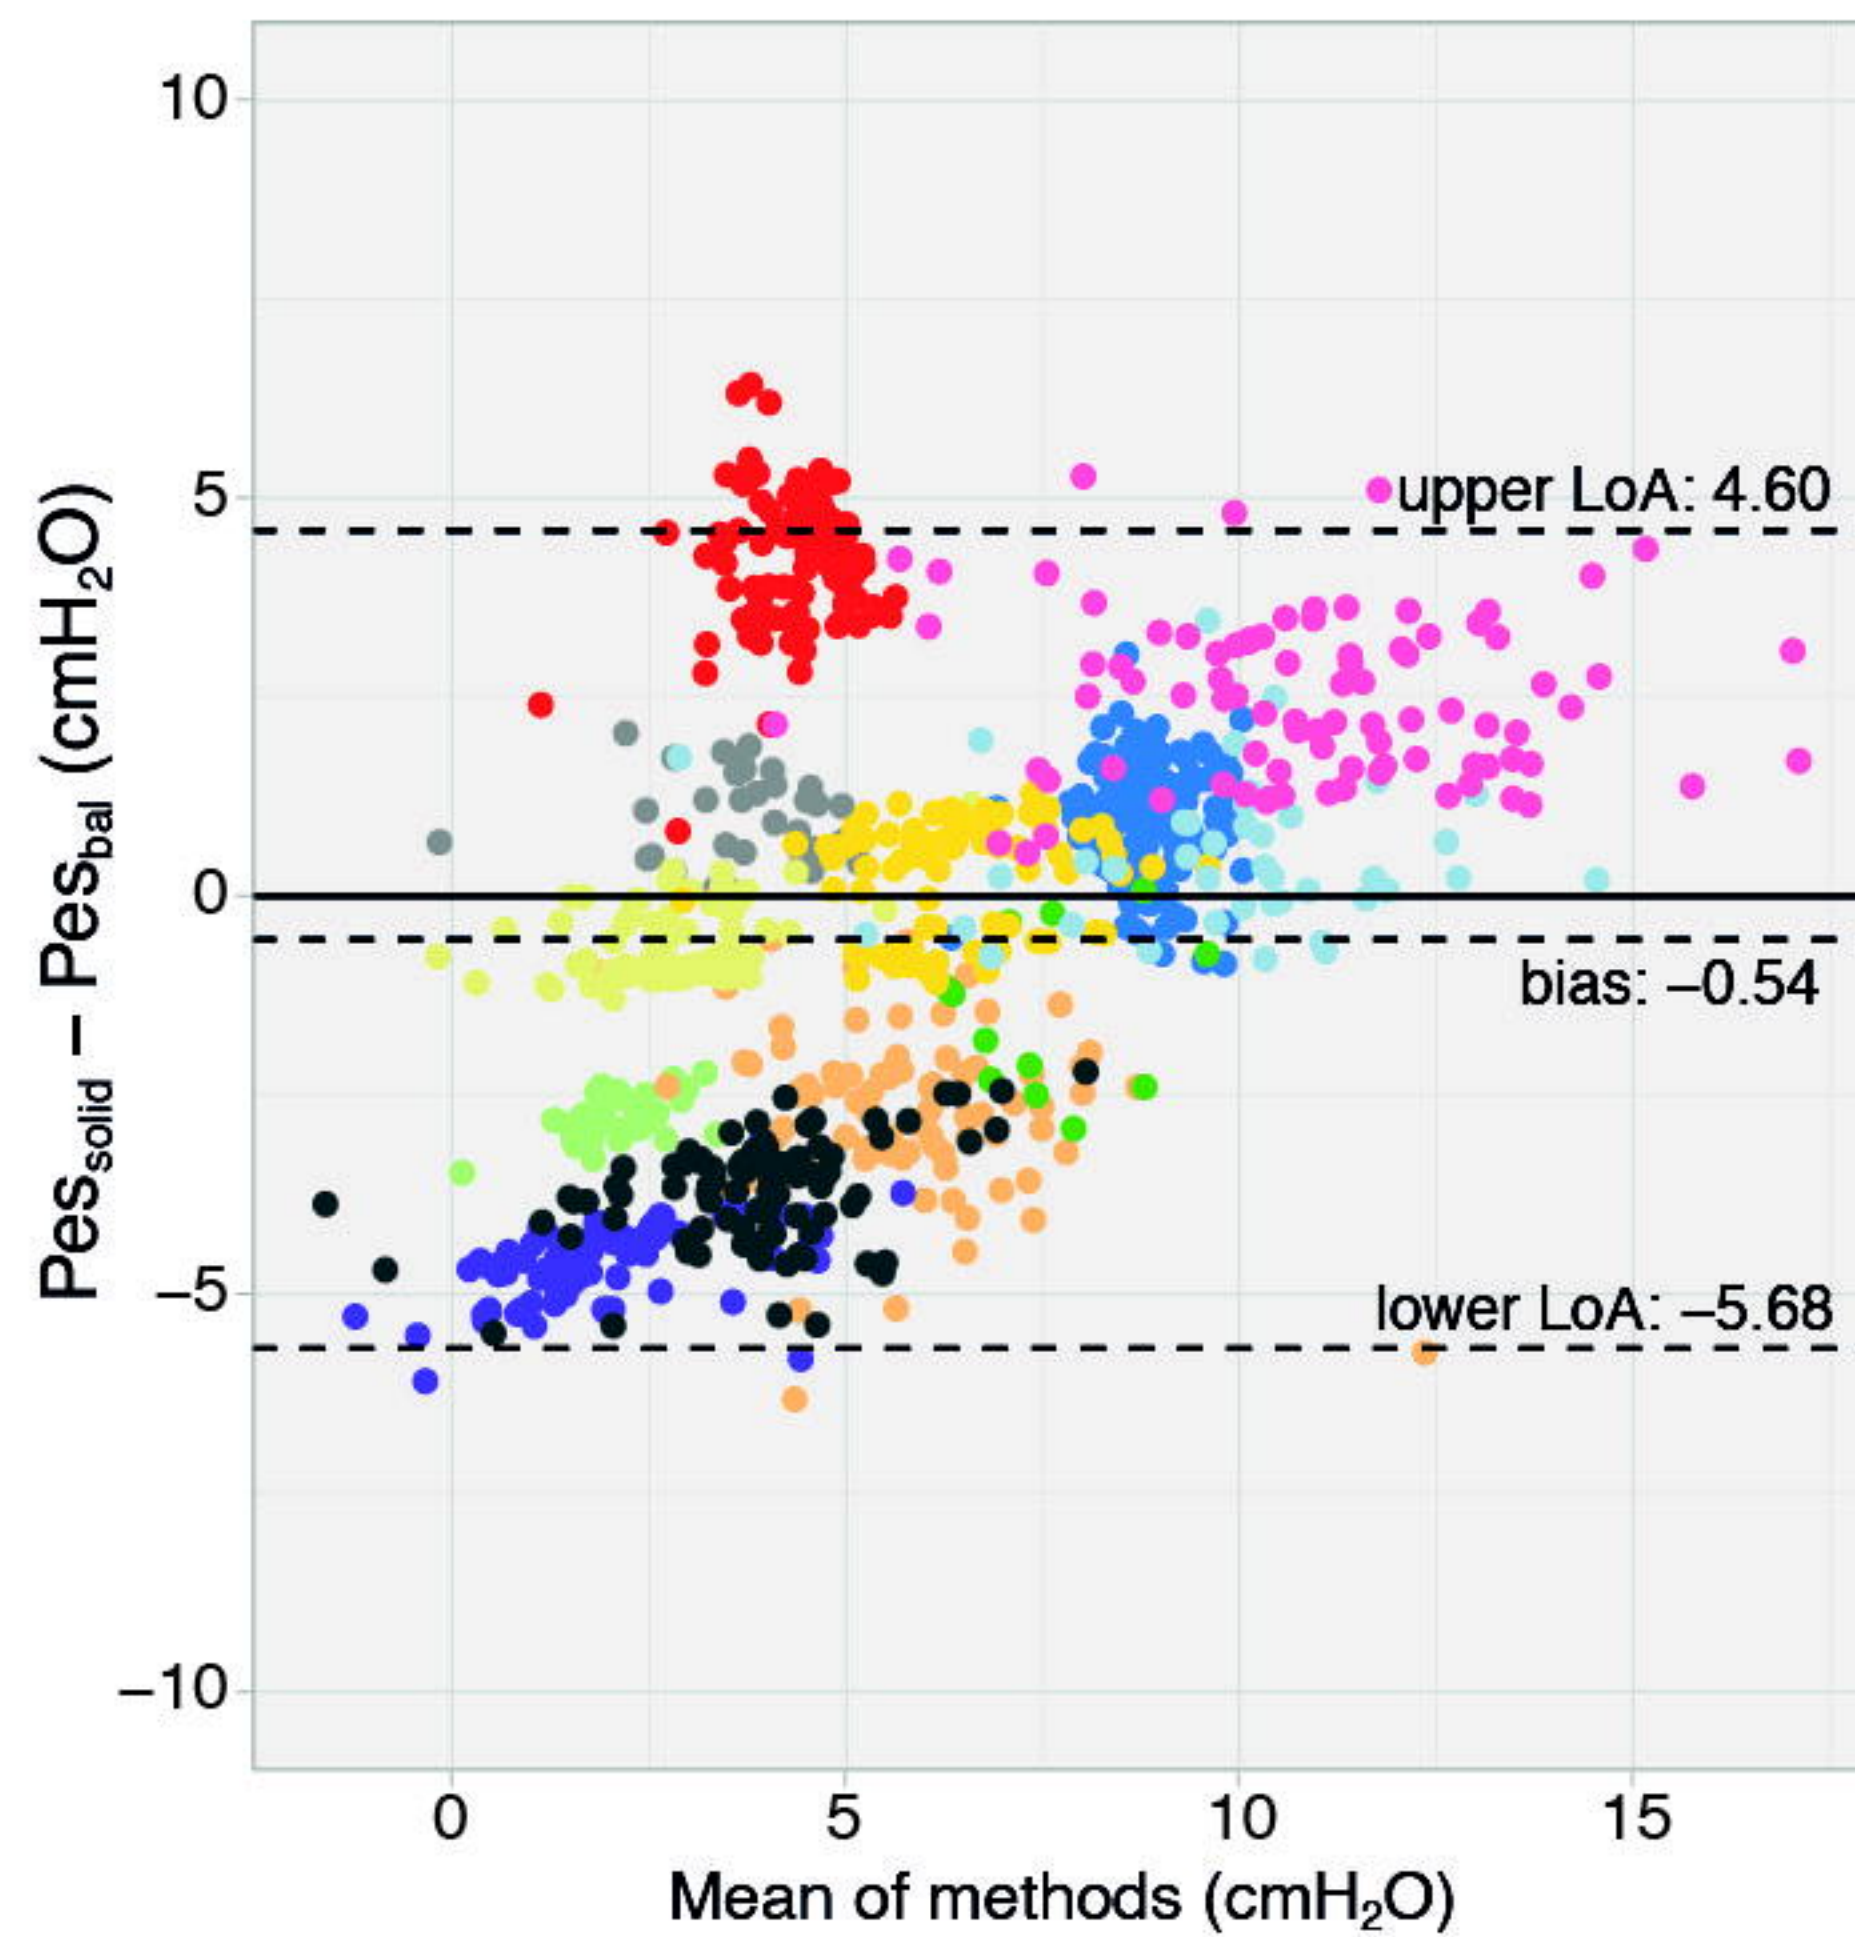

### C. Assisted: $\Delta$ Pes

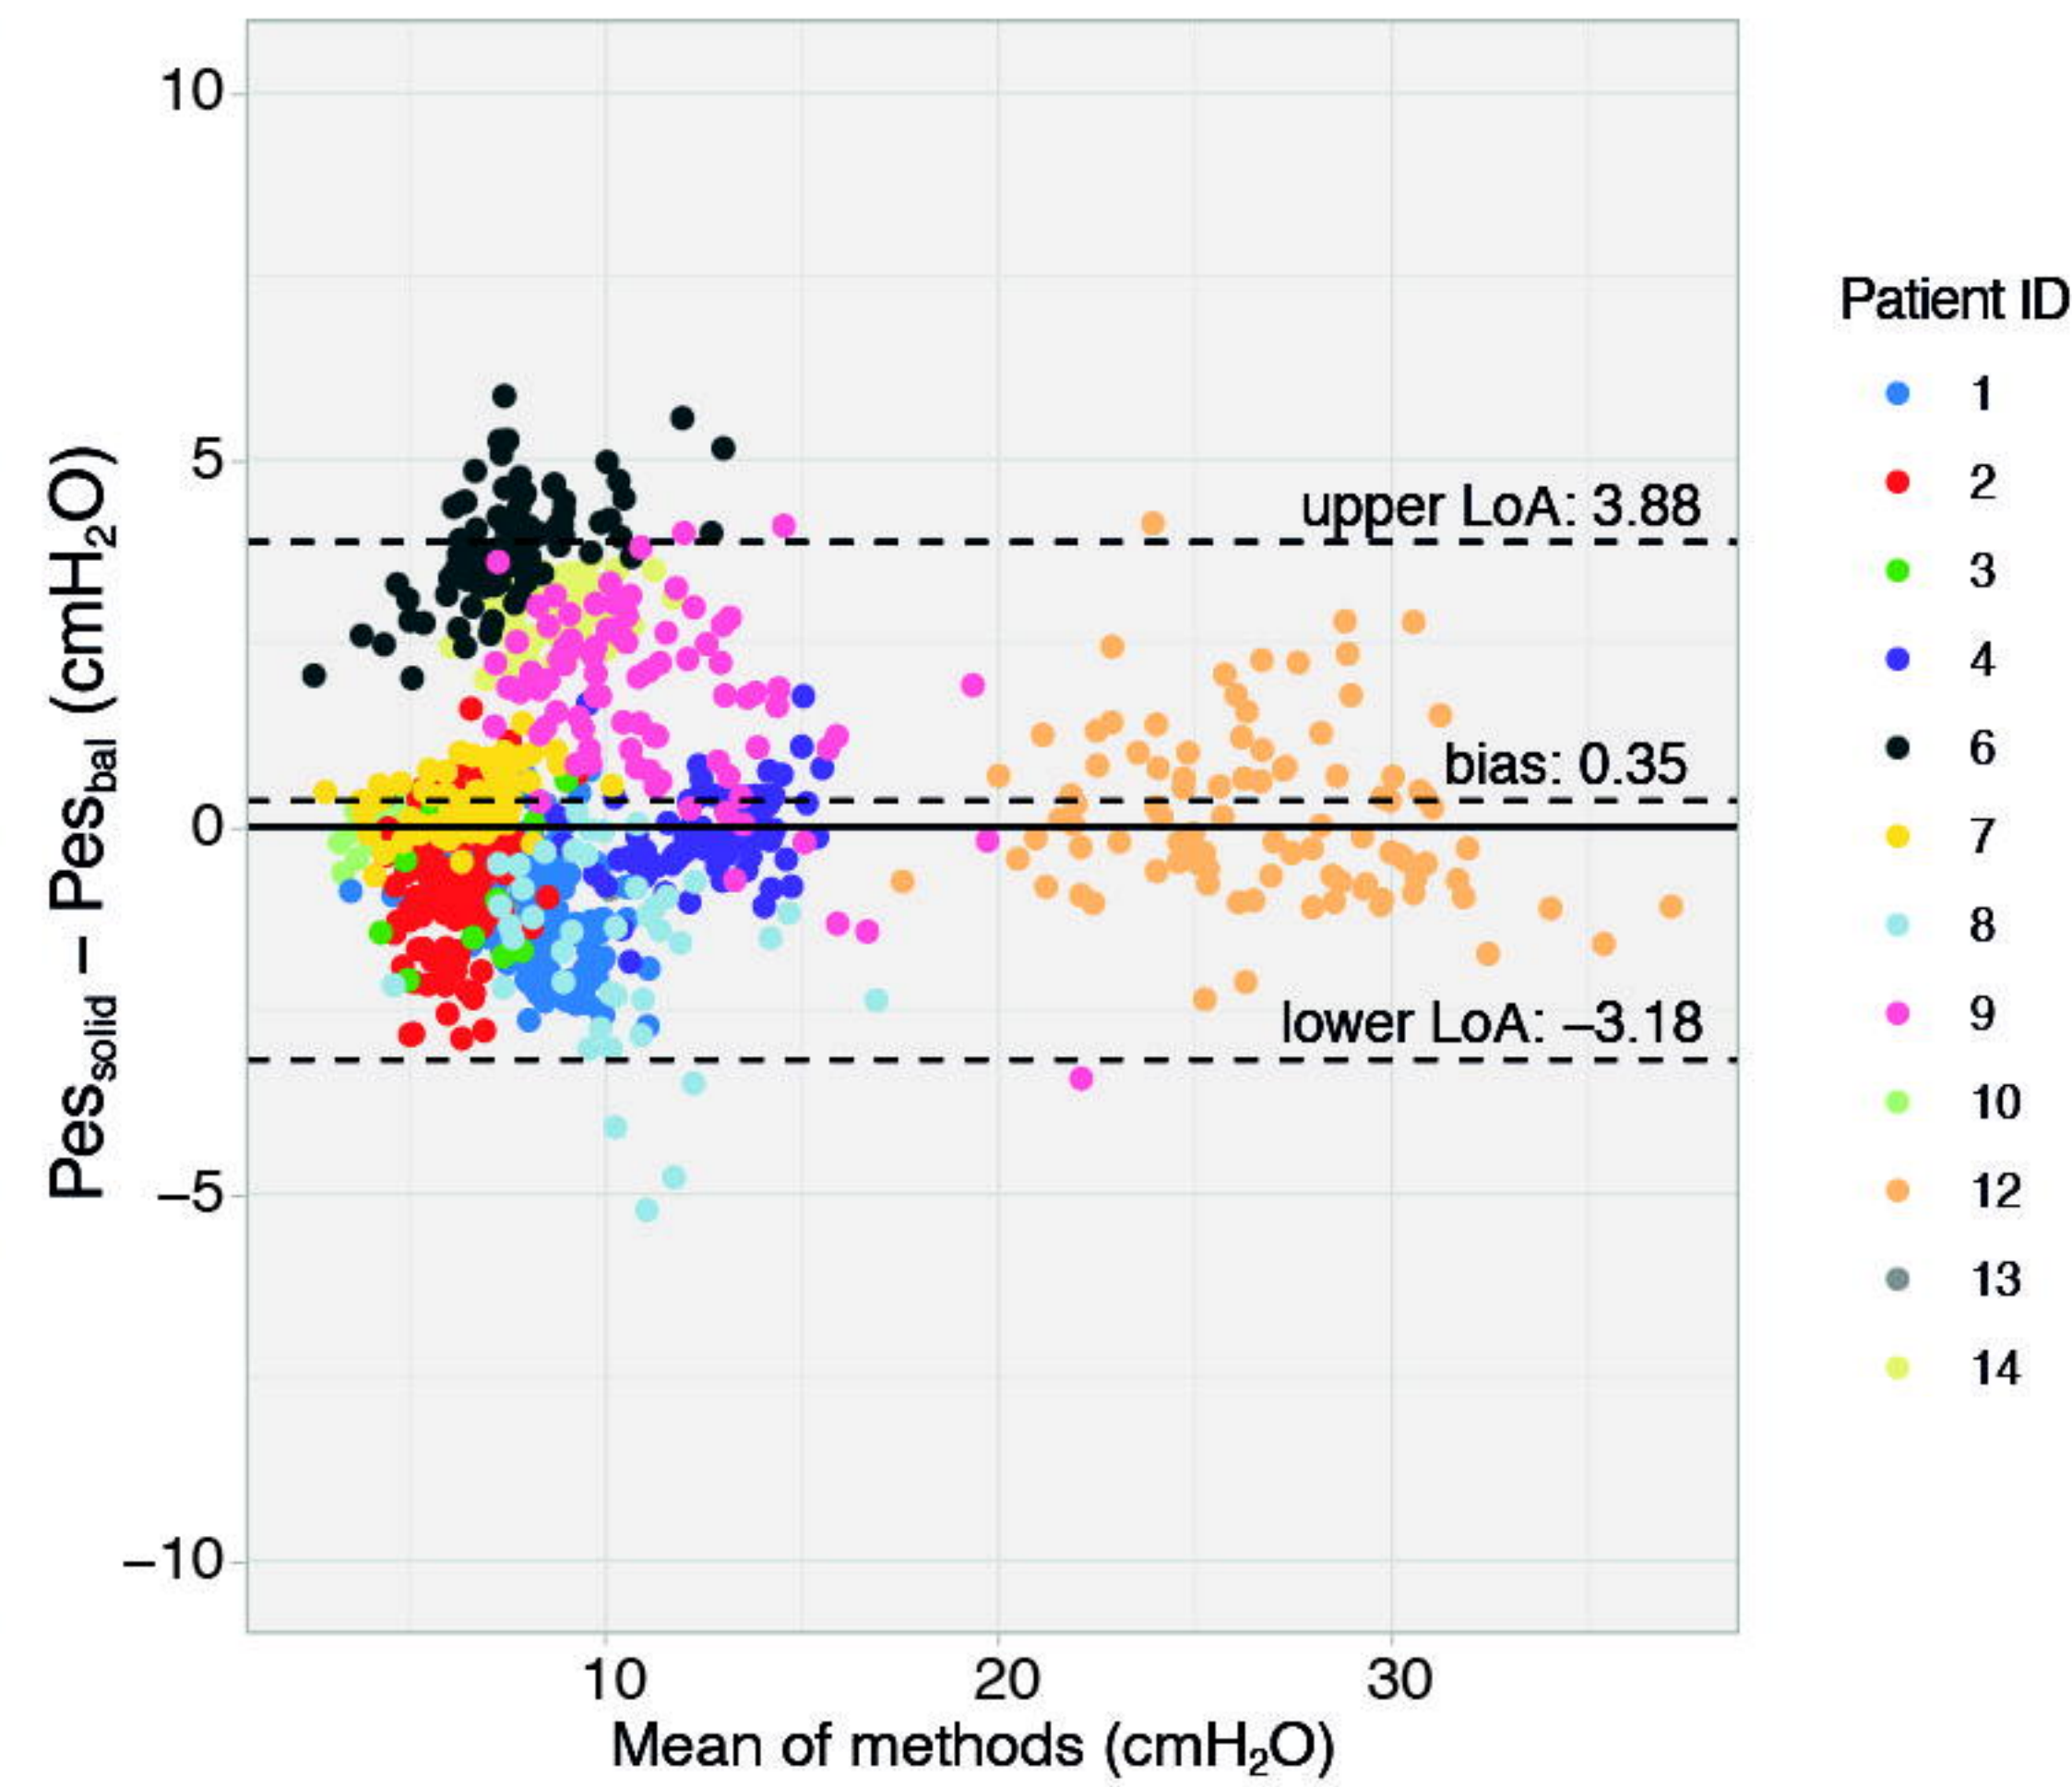

Source: https://medrxiv.org/content/10.1101/2024.10.01.24314687v1.full.pdf
