# Supplementary material for: Solid-state esophageal pressure sensor for the estimation of pleural pressure: a bench and first-in-human validation study
Source: medRxiv preprint, doi:10.1101/2024.10.01.24314687, version 1 (2024-10-01)
Supplement: Additional file 2 [file 314687_file09.docx]

**Additional file 2**


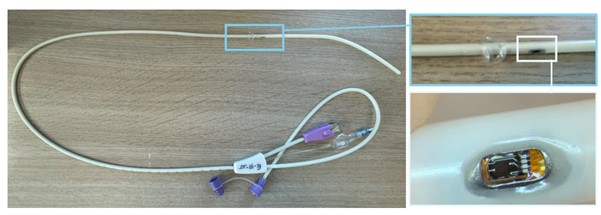


**Additional figure 2.** Intelligent esophageal pressure catheter (iEPC). The tiny solid-state sensor is embedded in the catheter, with a small balloon just above this sensor (top right photo). This balloon does not record any pressures but serves as a placeholder to make sure the sensor does not attach/stick to the esophageal wall.
